# Supplementary material for: Swedish nationwide time series analysis of influenza and suicide deaths from 1910 to 1978
Source: PubMed Central journal article supplement (PMC8266430; doi:10.1136/bmjopen-2021-049302), 2021-07-07
Supplement: bmjopen-2021-049302.draft_revisions.pdf [file bmjopen-2021-049302.draft_revisions.pdf]

# BMJ Open

BMJ Open is committed to open peer review. As part of this commitment we make the peer review history of every article we publish publicly available.

When an article is published we post the peer reviewers' comments and the authors' responses online. We also post the versions of the paper that were used during peer review. These are the versions that the peer review comments apply to.

The versions of the paper that follow are the versions that were submitted during the peer review process. They are not the versions of record or the final published versions. They should not be cited or distributed as the published version of this manuscript.

BMJ Open is an open access journal and the full, final, typeset and author-corrected version of record of the manuscript is available on our site with no access controls, subscription charges or pay-per-view fees (<http://bmjopen.bmj.com>).

If you have any questions on BMJ Open's open peer review process please email [info.bmjopen@bmj.com](mailto:info.bmjopen@bmj.com)

# BMJ Open

## Do pandemics lead to an increase in suicides? A Swedish nationwide analysis of historical and 2020 data

|                               |                                                                                                                                                                                                                                                                                                                                                                                                                                                                                             |
|-------------------------------|---------------------------------------------------------------------------------------------------------------------------------------------------------------------------------------------------------------------------------------------------------------------------------------------------------------------------------------------------------------------------------------------------------------------------------------------------------------------------------------------|
| Journal:                      | <i>BMJ Open</i>                                                                                                                                                                                                                                                                                                                                                                                                                                                                             |
| Manuscript ID                 | bmjopen-2021-049302                                                                                                                                                                                                                                                                                                                                                                                                                                                                         |
| Article Type:                 | Original research                                                                                                                                                                                                                                                                                                                                                                                                                                                                           |
| Date Submitted by the Author: | 22-Jan-2021                                                                                                                                                                                                                                                                                                                                                                                                                                                                                 |
| Complete List of Authors:     | Rück, Christian; Karolinska Institutet, Department of Clinical Neuroscience, Center for Psychiatry Research<br>Mataix-Cols, David; Karolinska Institutet, Department of Clinical Neuroscience, Center for Psychiatry Research<br>Malki, Kinda; Karolinska Institutet<br>Adler, Mats; Karolinska Institutet<br>Flygare, Oskar; Karolinska Institutet<br>Runeson, Bo; Karolinska Institutet, Clin Neuroscience<br>Sidorchuk, Anna; Karolinska Institutet Department of Clinical Neuroscience, |
| Keywords:                     | MENTAL HEALTH, COVID-19, Suicide & self-harm < PSYCHIATRY                                                                                                                                                                                                                                                                                                                                                                                                                                   |
|                               |                                                                                                                                                                                                                                                                                                                                                                                                                                                                                             |

SCHOLARONE™  
Manuscripts

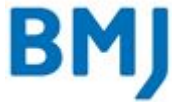

I, the Submitting Author has the right to grant and does grant on behalf of all authors of the Work (as defined in the below author licence), an exclusive licence and/or a non-exclusive licence for contributions from authors who are: i) UK Crown employees; ii) where BMJ has agreed a CC-BY licence shall apply, and/or iii) in accordance with the terms applicable for US Federal Government officers or employees acting as part of their official duties; on a worldwide, perpetual, irrevocable, royalty-free basis to BMJ Publishing Group Ltd ("BMJ") its licensees and where the relevant Journal is co-owned by BMJ to the co-owners of the Journal, to publish the Work in this journal and any other BMJ products and to exploit all rights, as set out in our [licence](#).

The Submitting Author accepts and understands that any supply made under these terms is made by BMJ to the Submitting Author unless you are acting as an employee on behalf of your employer or a postgraduate student of an affiliated institution which is paying any applicable article publishing charge ("APC") for Open Access articles. Where the Submitting Author wishes to make the Work available on an Open Access basis (and intends to pay the relevant APC), the terms of reuse of such Open Access shall be governed by a Creative Commons licence – details of these licences and which [Creative Commons](#) licence will apply to this Work are set out in our licence referred to above.

Other than as permitted in any relevant BMJ Author's Self Archiving Policies, I confirm this Work has not been accepted for publication elsewhere, is not being considered for publication elsewhere and does not duplicate material already published. I confirm all authors consent to publication of this Work and authorise the granting of this licence.

Word count  
Abstract: 293  
Body: 3405  
Tables: 3  
Figures: 3

1  
2  
3  
4  
5  
6  
7  
8  
9  
10  
11  
12  
13 **Do pandemics lead to an increase in suicides? A Swedish nationwide analysis of**  
14 **historical and 2020 data**  
15  
16

17  
18 Christian Rück, M.D.<sup>1</sup>, David Mataix-Cols, Ph.D.<sup>1</sup>, Kinda Malki, M.D. <sup>1</sup>, Mats Adler, M.D. <sup>1</sup>,  
19 Oskar Flygare, M.Sc.<sup>1</sup>, Bo Runeson, M.D. <sup>1</sup>, Anna Sidorchuk, M.D.<sup>1</sup>  
20  
21  
22  
23  
24  
25

26 Corresponding author:

27 Professor Christian Rück, M46, Karolinska University Hospital Huddinge, SE-14186  
28 Huddinge, Sweden E-mail: [Christian.ruck@ki.se](mailto:Christian.ruck@ki.se), telephone +46704843392.  
29  
30  
31

32 Affiliation:

33 1. Centre for Psychiatry Research, Department of Clinical Neuroscience,  
34 Karolinska Institutet, & Stockholm Health Care Services, Region Stockholm, Sweden  
35  
36  
37  
38  
39  
40  
41  
42  
43  
44  
45  
46  
47  
48  
49  
50  
51  
52  
53  
54  
55  
56  
57  
58  
59  
60

## ABSTRACT

**Objectives:** There is concern that the COVID-19 pandemic will lead to a surge of suicides, but evidence supporting a link between pandemics and suicide is limited. Using data from the three influenza pandemics of the 20<sup>th</sup> century, we aimed to investigate whether an association exists between influenza deaths and suicide deaths.

**Design:** Time series analysis.

**Setting:** Sweden.

**Participants:** Deaths from influenza and suicides extracted from the Statistical Yearbook of Sweden for 1910-1978, covering three pandemics, and from the National Board of Health and Welfare for January to June of each year during 2000-2020, and deaths from COVID-19 for the first half of 2020.

**Main outcome measures:** Annual suicide rates in Sweden among the whole population, men, and women. Non-linear autoregressive distributed lag (NARDL) models was implemented to explore if there is a short-term and/or long-term effect of increases and decreases in influenza death rates on suicide rates during 1910-1978. Descriptive analyses were used for 2020 data.

**Results:** Between 1910-1978, there was no evidence of either short-term or long-term significant associations between influenza death rates and changes in suicides ( $\beta$ -coefficients of 0.00002,  $P=0.931$  and  $\beta=0.00103$ ,  $P=0.764$  for short-term effect of increases and decreases in influenza death rates, respectively, on suicide rates, and  $\beta=-0.0002$ ,  $P=0.998$  and  $\beta=0.00211$ ,  $P=0.962$  for long-term effect of increases and decreases in influenza death rates, respectively, on suicide rates). The same pattern emerged in separate analyses for men and women. Suicide rates in January-June 2020 revealed a slight decrease compared to corresponding rates in January-June 2019 (-1.2% among men and -12.8% among women).

**Conclusions:** We found no evidence of short or long-term association between influenza death rates and suicide death rates across three 20<sup>th</sup> century pandemics and the first wave of COVID-19 did not lead to an acute increase of suicides.

**Key words:** pandemics, suicide, mental health, Spanish flu, Asian influenza, Hong-Kong influenza, COVID-19

### Strengths and limitations of this study

- First study to assess influenza death and suicide across several pandemics.
- The large amount of nationwide data on influenza and suicide death rates covering 1910-1978 complemented with the most recent official information, including deaths due to COVID-19, is a strength of the study.
- To guard against effects of changes in the recording of causes of death, we created a series of dummy variables for each corresponding period but no significant effects were found.
- No historical data with higher temporal resolution than yearly data could affect the results if the time sequence of association between changes in influenza death and suicide differ from the chosen time interval.

## INTRODUCTION

Various international surveys have documented a negative impact of the COVID-19 pandemic on the population's mental health, with increased levels of psychological stress, psychiatric symptoms, insomnia, and alcohol consumption.[1–4] A report from the UK also indicated an increase in suicidal ideation.[3] Whether these acute impacts will persist long term is currently unknown. The Royal College of Psychiatrists in the UK has warned of a “tsunami of mental illness”, and the World Health Organization as well as the International Academy of Suicide Research have raised concerns of a possible increase in suicide rates.[5–7] Such concerns originate from a combination of known risk factors for suicide, including the impacts of social distancing and disconnectedness, an economic downturn, the decreased access to mental health services, and increased access to lethal means exemplified by an increase in gun purchases in the US.[8] For example, a study of the economic recession in USA 2007-2009 found that for every percentage point increase in the unemployment rate, there was about a 1.6 per cent increase in the suicide rate.[9,10] By contrast, a study failed to find an increase in suicide rates in Sweden during the two most recent economic recessions.[11]

While the concern is widespread, there is currently little evidence to support a clear association between the ongoing COVID-19 outbreak and an increased risk of suicide. A recent review concluded that the quality of the evidence so far on the association between COVID-19 and suicidal behaviour was low and initial reports do not indicate an acute increase of suicides in the first COVID-19 wave.[12,13] Historic US mortality data from the largest pandemic in the 20<sup>th</sup> century, the Spanish flu, showed that the Spanish flu was associated with an increase in suicides but those effects may have been mitigated by a decline in alcohol consumption.[14] The outbreak of the Severe Acute Respiratory Syndrome (SARS) epidemic in 2003 in Hong Kong was according to two studies associated with an increase of suicide in the population above the age of 65.[15,16] In the first of these two reports, the association was only statistically significant in elderly women.[15] To summarize, at present, our understanding of the effects of pandemics on suicide rates is very limited.

The availability of high-quality historical data on mortality due to influenza and suicide in Sweden provides a unique opportunity to examine this important question. Using historical data from the three major influenza pandemics of the 20<sup>th</sup> century, we aimed to formally investigate whether an association between influenza deaths and suicide deaths exists. Given the substantial sex differences in suicidal behaviour, we additionally report on associations separately in men and women. We also report preliminary nationwide data from the first half of 2020.

## METHODS

### Data acquisition

Annual data on influenza death rates and suicide rates were estimated based on information from the Statistical Yearbook of Sweden from 1910-1978.[17] Over this period, Sweden was hit by three influenza pandemics which occurred during different socio-political contexts, namely the Spanish flu (1918-1920, with the first case appearing in Sweden in June 1918), the Asian flu (1957-1958, being first documented in August 1957), and the Hong Kong flu (1968-1969, starting in the autumn of 1968).[18] The yearbooks were produced by Statistics

Sweden, a governmental agency responsible for the official statistics in Sweden, with a history of population statistics going back to the 18<sup>th</sup> century.[17] For each year from 1910 to 1978, we retrieved information on the total population of Sweden, the number of deaths by influenza (if death cause was indicated as “influenza”) and the number of suicides (if death cause was indicated as “suicide”), as well as the corresponding data separately for men and women. Since yearbooks reported data retrospectively for several years prior to the year each book was published, we checked the correctness of retrieved data by comparing yearbooks with overlapping reporting periods. We constructed influenza mortality rates and suicide rates per 100 000 inhabitants for each year by dividing the number of deaths by influenza and, separately, suicide, by the total number of individuals registered in Sweden in a corresponding year and then multiplying by 100 000. The corresponding rates for men and women were constructed likewise. In addition, we collected information on the changes in registration of deaths in Sweden that included the cause of death classification based on the Bertillon criteria (prior to 1931), the new classification introduced in cooperation with statistical authorities from other Nordic countries (1931-1950), the International Classification of Diseases (ICD) Sixth Revision (ICD-6; 1951-1957), ICD-7 (1958-1968), and ICD-8 (1969-1978).[19] To capture a potential effect of changes in classification, we created a series of dummy variables for each corresponding period, but these were only kept in the models if statistically significant.

On November 17<sup>th</sup>, 2020, the Swedish National Board of Health and Welfare published statistics on the number all-cause and cause specific deaths (for 1997-2020) and the corresponding age-standardized death rates per 100 000 inhabitants for men and women (for 2000-2020; with the total population of Sweden in 2019 as the standard population for both men and women).[20] Importantly, all reported mortality data refer to deaths that occurred during January-June of each year from 1997 to 2020. The reported statistics also included deaths due to COVID-19 that occurred during the first six months of 2020. As the data were made publicly available, we retrieved information on January-June 2000-2020 age-standardized death rates due to influenza (ICD-10 codes: J09 – J11) and suicide and other intentional self-harm (ICD-10 codes: X60 – X84, Y870), and information on January-June 2020 age-standardized death rates due to COVID-19 (ICD-10 codes: U07.1-U07.2), in men and women.

The study protocol was not preregistered. The full dataset used in the analysis of historical data (1910-1978) and the STATA code are available in the online Supplement (**Supplementary eTable 1** and **Supplementary material**). Data on deaths in January-June 1997-2020 are available online at the National Board of Health and Welfare.[20]

### Statistical Analyses

We used the historical data 1910-1978 that span over three pandemics and focused on exploring a possible asymmetric short-term effect (i.e., instantaneous) and long-term effect (i.e., if distributed over a longer period of time) of influenza death rates on suicides by applying non-linear autoregressive distributed lag (NARDL) models,[21] a technique initially introduced for research in economics. NARDL models split the exposure in partial sum of positive changes (i.e., increases in influenza death rates) and partial sum of negative changes (i.e., decreases in influenza death rates) and explore if an outcome responds differently (i.e., asymmetrically) to an increase and decrease in exposure variable.[21] In other words, NARDL models do not rely on an assumption of symmetrical effects, by which the association of the outcome with a unit of positive change in the exposure is expected to be equal in strength and opposite in direction to the association between the outcome and a unit



of negative change in the exposure. We performed the modelling by using the *nardl* command in STATA.

Before the NARDL model is executed, it is important to test that the conditions for the modelling are fulfilled. It starts from testing whether or not the variables are stationary (i.e., their means and variances are constant over time). The advantage of the NARDL modelling is that it can be used regardless of whether the variables are integrated of the order zero, which means that variables are stationary, integrated of the the order one, which indicates non-stationarity, or mixed.[21] We examined the stationarity properties of the variables by using the Augmented Dickey–Fuller unit-root test (ADF) and Kwiatkowski-Phillips-Schmidt-Shin test for stationarity (KPSS) to explore the order of the integration for influenza death rates and suicide rates separately for the total population, men, and women. Previous studies on suicides hypothesized that various suicidogenic factors may interplay and reinforce each other and the logarithmic transformation of suicide time series was suggested.[22,23] We made such transformation by expressing suicide rates in natural logarithm. To select the optimal number of lags (i.e., how far in the past the dependency among measurements is examined) to be used in the NARDL for dependent and independent variables, we applied the *varsoc* command in STATA using the minimal values of Akaike Information Criterion, Schwarz’s Bayesian information criterion (SBIC), and the Hannan and Quinn information criterion information criteria. If information criteria indicated different lag orders, SBIC was used to select optimal lags. We applied the NARDL model to (i) estimate the coefficients and the corresponding 95% confidence intervals for short-term and long-term association of suicide rates with an increase and decrease in influenza death rates; (ii) explore if there is a long-term cointegration between exposure and outcome by using a bounds test (if variables are cointegrated, it means their positive and negative components do not drift far away from each other in the longer term); and (iii) obtain Wald test statistics that specifies whether or not short-term and/or long-term relation between the exposure and outcome is asymmetrical. Model diagnostic tests are described in the **Supplementary material**.

The modelling was performed, first, for the whole period of 1910-1978, and then for the periods of 1918-1956 (from the beginning of the Spanish influenza pandemic to the year before the Asian influenza pandemic), and for 1957-1978 (from the beginning of Asian pandemic to the end of observation period; with this interval also covering the Hong Kong influenza pandemic).

For a descriptive analysis of the data from two recent decades, we graphically visualized age-standardized death rates among men and women for influenza and suicides across January-June 2000-2020, and for COVID-19 in January-June 2020. Additionally, for suicides among men and women, we estimated the relative change in suicide rates reported for the first six months of 2020 to the rates reported for the same months in 2019.

All statistical analyses were performed using STATA version 15.1 (StataCorp LLC, College Station, TX, USA).

### **Patient and public involvement**

Patients and members of the public were not directly involved as this study used publically available historical national mortality data.



## RESULTS

Over the period 1910-1978, influenza death rates fluctuated considerably in Sweden with the highest rates being observed during the Spanish flu (in 1918, 1919, and 1920, the rates were 470.93, 125.55, and 48.32 per 100 000 inhabitants, respectively) (**Figure 1**). In post-pandemic years, several noticeable peaks in influenza death rates appeared, with the ones in 1922, 1927, 1929, 1931, 1937, and 1941 being particularly high. In the following years, a considerable fluctuation in influenza mortality remained, although the rates during the periods of the Asian flu (in 1957 and 1958: 8.78 and 3.99 per 100 000 inhabitants, respectively) and the Hong Kong flu (in 1968 and 1969: 3.67 and 4.68 per 100 000 inhabitants, respectively) were lower than that in the first half of the century. The influenza death rates were very similar in men and women across the entire observation period (**Figure 2**).

[Figure 1 to be inserted here]

[Figure 2 to be inserted here]

During the same period, a total of 80 058 deaths due to suicide occurred in Sweden (60 713 in men and 19 345 in women). The average suicide rate across 1910-1978 was 16.79 per 100 000 inhabitants (standard deviation [SD] of 2.58), with corresponding rates for men and women as 25.85 (SD=3.37) and 7.91 (SD=2.26) per 100 000, respectively. There was a considerable fluctuation in the suicide rates over time (**Figure 1**). The initial decrease in suicide rates during 1913-1918, with the lowest rate of 9.97 per 100 000 in 1918, was followed by an increase with the highest peak of 22.15 per 100 000 reached in 1970, with a series of intermediate peaks.

Sex-specific suicide rates differed considerably with the rates among men being between twice to over four times higher than that in women (on average, 3.4-times higher) (**Figure 2**). Moreover, suicide rates in men exhibited a sharp dip in 1913-1918, which was first followed by an increase by 1921 and then continued to raise more gradually, although with several distinct peaks and, rarely, dips. Among women, an upward trend in suicide rate was present, although with less fluctuations than that in men.

In our analysis of 1910-1978 data, the first step with the use of the ADF and KPSS test statistics on variables' stationarity indicated that the logarithmically-transformed suicide rates were integrated of the order one (for all, and men and women separately); whereas the influenza death rates were integrated of the order zero (for all and for men and women separately) (**Supplementary eTable 2**). On this premise, we implemented the NARDL modelling. Dummy variables on changes in death registration did neither appear statistically significant nor affected any parameter estimates in the initial model, and thus were not included in the final models. As reported in **Table 1**, for the observation period of 1910-1978, there were no statistically significant associations (either short-term or long-term) between decreased or increased influenza death rates and suicide rates among the overall population and among men. The corresponding results for women indicated a possible short-term association whereby a decrease in influenza rates seemed to be associated with a borderline decrease in suicides; however, the findings were not supported by the Wald test for asymmetry ( $[\text{Wald}_{\text{SR}}]$ , i.e. the null hypothesis of  $\text{Wald}_{\text{SR}}$  that an increase and decrease in influenza death rates would symmetrically affect suicide rates was not rejected). This suggests that association was likely due to the effect of other unobserved factors that may influence suicides in women. Full specification of the models is reported in **Supplementary eTable 3**. Full specification also includes the results of testing for long-term cointegration between

1  
2  
3 influenza mortality and suicides (as reported by F-statistics for Pesaran/Shin/Smith bounds  
4 test [F\_PSS]). Long-term cointegration was not found as we were unable to reject the null  
5 hypothesis of no cointegration between variables (**Supplementary eTable 3**, see footnotes for  
6 details on bounds test for cointegration).  
7

8  
9 The results of the additional analyses for the periods 1918-1956 and 1957-1978 also failed to  
10 provide clear evidence of association between changes in influenza mortality rates and suicide  
11 rates in either short-term or long-term. However, in the analysis among women, a long-term  
12 asymmetry was suggested in both periods (the Wald test for asymmetry in the long-term  
13 [Wald<sub>LR</sub>]  $p=0.044$  and  $p<0.001$  in the analyses of 1918-1956 and 1957-1978, respectively)  
14 and a short-term asymmetry in the analysis of 1957-1978 (Wald<sub>SR</sub> test  $p=0.019$ ) (**Tables 2** and  
15 **3**). We assume that these findings may again reflect the influence of unobserved confounders,  
16 as these results were not supported by other coefficients. It is important to mention that the  
17 results for 1957-1978 should be considered with caution since the analysis included time  
18 series with only 22 observations. Full specifications for the models used in the analyses of  
19 1918-1956 and 1957-1978 are reported in **Supplementary eTable 4** and **5**. No evidence of  
20 long-term cointegration between influenza and suicide rates were found in either period  
21 (F\_PSS statistics does not reject the null hypothesis in the analyses of the whole population,  
22 men, and women; **Supplementary eTable 4** and **5**, see footnotes for details on bounds test for  
23 cointegration).  
24  
25  
26

27 A descriptive analysis of mortality data from the National Board of Health and Welfare for  
28 January-June 2000-2020 (**Figure 3**) showed a considerable fluctuation over time in influenza  
29 death rates along with a close correspondence in those rates in men and women. For both  
30 sexes, the highest influenza death rates in January-June appeared in 2000 and 2018. During  
31 the first six months of 2020, influenza death rates were low in both men and women (1.5 and  
32 1.0 per 100 000 inhabitants, respectively), contrasting the very high COVID-19 death rates  
33 observed during the same period (67.8 and 39.9 per 100 000 inhabitants in men and women,  
34 respectively). For suicides, data from January-June of each year from 2000 to 2020 revealed,  
35 on average, 2.5-time higher rates in men. Interestingly, the relative change in suicide rates in  
36 the first half of 2020 compared to suicide rates in the first half of 2019 showed a decrease in  
37 rates, although marginal in men (-1.2%; from 8.6 per 100 000 in January-June 2019 to 8.5 per  
38 100 000 in January-June 2020), while more noticeable in women (-12.8%; from 3.9 per 100  
39 000 in January-June 2019 to 3.4 per 100 000 in January-June 2020).  
40  
41

42 [Figure 3 to be inserted here]  
43  
44  
45  
46

## 47 DISCUSSION

48 This study used publicly available Swedish national data from 1910 to 1978 to shed light on  
49 the potential association between influenza-related deaths and over 80 000 deaths by suicide  
50 across the three 20<sup>th</sup> century pandemics. To our knowledge, this is the first study of influenza  
51 death and suicide that analyses data from several influenza pandemics. The full modelling  
52 provided no clear evidence of either a short-term or a long-term relationship between changes  
53 in influenza death rates and changes in suicide rates. The year with the highest number of  
54 influenza-related deaths by far, 1918, had the lowest number of suicides in the whole time  
55 series. Consistently, preliminary data from the COVID-19 pandemic revealed that suicide  
56 rates had slightly decreased in January-June 2020, compared to the rates in January-June 2019  
57 (relative decrease by -1.2% among men and -12.8% among women).  
58  
59

## 60 The findings in context

1  
2  
3 International historical data on pandemics and suicide are very scarce. A report from the US  
4 focusing on the years 1910-1920 and using monthly data suggested a possible association  
5 between influenza deaths and suicide.[14] Similarly, a study focusing on SARS and suicide  
6 found some evidence of sex-specific effects in the short-term.[15] As suicide rates varied  
7 considerably in the years preceding SARS in Hong Kong, it is difficult to be certain that  
8 SARS, and not other contributing factors, was causally associated with an increase in  
9 suicides. In the present study, which uniquely spanned over several decades, we found that  
10 while suicide was consistently more prevalent among men throughout the study period, there  
11 were no sex-specific associations to influenza death.  
12  
13  
14

### 15 **Meaning of the study**

16 What do these results mean for our understanding of the short- and long-term consequences of  
17 COVID-19? Our results do not support the widespread belief that global pandemics may  
18 necessarily lead to a substantial increase in suicides. There are many factors associated with a  
19 global pandemic that may potentially increase suicide risk in the population, but these may be  
20 offset by other protective factors that should not be overlooked. A shared sense of belonging  
21 and focus, social connectedness and a “pulling together effect” may be one such factor.[1,24]  
22  
23  
24

### 25 **Strengths and limitations**

26 The use of a large amount of historical national data across three pandemics and up-to-date  
27 official information on influenza and suicide death rates, including recently reported death  
28 rates due to COVID-19, is the major strength of this study.  
29

30  
31 The study used the Swedish historical public death records and we had no means of verifying  
32 the causes of death. The coverage and precision of these records is likely to have improved  
33 over time for both variables. To guard against effects of changes in the recording of causes of  
34 death, we created a series of dummy variables for each corresponding period but no  
35 significant effects of those were found. If there were some other time-varying factors that  
36 could affect the coverage and precision of death records, apart from the official changes in  
37 registration system, this might have biased our results, in particular if such factors  
38 differentially affected the quality of recording deaths due to influenza and suicide. As we did  
39 not have access to data with higher temporal resolution than yearly data, that could affect our  
40 results if the time sequence of association between changes in influenza death and suicide  
41 differ from the chosen time interval. A multitude of factors may vary that impact the  
42 resilience of the society with regards to the effect of a pandemic. Such factors may also vary  
43 over time and place. However, the fact that we observed no clear associations between  
44 influenza and suicide deaths across pandemics, which challenged society with various degrees  
45 of lockdown, economic effects and health care supply issues, does support the stability of our  
46 findings.  
47  
48  
49

### 50 **Conclusion**

51 In this national analysis of historical data spanning across three 20<sup>th</sup> century pandemics, we  
52 found no evidence of a short- or long-term association between influenza death rates and  
53 suicide rates. Suicide rates in January-June 2020 (when the first wave of COVID-19 occurred)  
54 were not higher than those of the corresponding period in 2019. Our results challenge the  
55 notion that a tsunami of suicides is to be expected as a result of COVID-19 and we suggest a  
56 more moderated message to the public to avoid unfounded fear and an ineffective use of  
57 resources for prevention and care.  
58  
59  
60

## Footnotes

Contributor statement: CR and AS have full access to all the data in this study and take full responsibility as guarantors for the integrity of the data and the accuracy of the data analysis. CR, DMC, and AS conceived and designed the study. CR, KM, MA, and AS performed data collection. AS undertook the statistical analysis. CR, DMC, and AS drafted the manuscript. All authors provided critical input to the analyses, interpreted the data, and revised the manuscript critically. The corresponding author confirms that all listed authors meet authorship criteria and that no others meeting the criteria have been omitted.

Funding: Karolinska Institutet and Region Stockholm, which provide salary for the authors, had no involvement in the study design; collection, analysis, and interpretation of data; in the writing of the report; or in the decision to submit the paper for publication.

Competing interests: All authors have completed the ICMJE uniform disclosure form at [www.icmje.org/coi\\_disclosure.pdf](http://www.icmje.org/coi_disclosure.pdf) and declare: no grant support from any organisation for the submitted work, salaries of the author were provided from Region Stockholm and Karolinska Institutet but not specifically for this project; no financial relationships with any organisations that might have an interest in the submitted work in the previous three years; no other relationships or activities that could appear to have influenced the submitted work.

Ethical approval: Since only data already available in the public domain were used, ethical approval was not necessary.

Data sharing: The full dataset (numbers of deaths by influenza and suicide and total population for 1910-1978) is published as supplementary material (eTable 1). Data on deaths in January-June 1997-2020 are available online at the National Board of Health and Welfare.[20,25]

Dissemination to participants and patient organizations: since only aggregated mortality data was used, dissemination to participants is not possible. We intend to disseminate the results to the general public via media and the research groups webpage.

Transparency declaration: The lead author affirms that this manuscript is an honest, accurate, and transparent account of the study being reported; that no important aspects of the study have been omitted; and that any discrepancies from the study as planned have been explained.

## References

- 1 Reger MA, Stanley IH, Joiner TE. Suicide Mortality and Coronavirus Disease 2019—A Perfect Storm? *JAMA Psychiatry* Published Online First: 10 April 2020. doi:10.1001/jamapsychiatry.2020.1060
- 2 Dutheil F, Mondillon L, Navel V. PTSD as the second tsunami of the SARS-Cov-2 pandemic. *Psychol Med* 2020;:1–2. doi:10.1017/S0033291720001336
- 3 O'Connor RC, Wetherall K, Cleare S, *et al.* Mental health and well-being during the COVID-19 pandemic: longitudinal analyses of adults in the UK COVID-19 Mental Health & Wellbeing study. *Br J Psychiatry* 2020;:1–8. doi:10.1192/bjp.2020.212
- 4 Pierce M, Hope H, Ford T, *et al.* Mental health before and during the COVID-19 pandemic: a longitudinal probability sample survey of the UK population. *Lancet Psychiatry* 2020;7:883–92. doi:10.1016/S2215-0366(20)30308-4
- 5 WHO. Substantial investment needed to avert mental health crisis. <https://www.who.int/news-room/detail/14-05-2020-substantial-investment-needed-to-avert-mental-health-crisis> (accessed 1 Jun 2020).
- 6 Zalsman G, Stanley B, Szanto K, *et al.* Suicide in the Time of COVID-19: Review and Recommendations. *Arch Suicide Res* 2020;:1–6. doi:10.1080/13811118.2020.1830242
- 7 Psychiatrists see alarming rise in patients needing urgent and emergency care and forecast a 'tsunami' of mental illness. [www.rcpsych.ac.uk](http://www.rcpsych.ac.uk). <https://www.rcpsych.ac.uk/news-and-features/latest-news/detail/2020/05/15/psychiatrists-see-alarming-rise-in-patients-needing-urgent-and-emergency-care> (accessed 1 Jun 2020).
- 8 Moutier C. Suicide Prevention in the COVID-19 Era: Transforming Threat Into Opportunity. *JAMA Psychiatry* Published Online First: 16 October 2020. doi:10.1001/jamapsychiatry.2020.3746
- 9 Stuckler D, Basu S, Suhrcke M, *et al.* The public health effect of economic crises and alternative policy responses in Europe: an empirical analysis. *The Lancet* 2009;374:315–23. doi:10.1016/S0140-6736(09)61124-7
- 10 Phillips JA, Nugent CN. Suicide and the Great Recession of 2007–2009: The role of economic factors in the 50 U.S. states. *Soc Sci Med* 2014;116:22–31. doi:10.1016/j.socscimed.2014.06.015
- 11 Reeves A, McKee M, Stuckler D. Economic suicides in the Great Recession in Europe and North America. *Br J Psychiatry* 2014;205:246–7. doi:10.1192/bjp.bp.114.144766
- 12 John A, Okolie C, Eyles E, *et al.* The impact of the COVID-19 pandemic on self-harm and suicidal behaviour: a living systematic review. *F1000Research* 2020;9:1097. doi:10.12688/f1000research.25522.1
- 13 John A, Pirkis J, Gunnell D, *et al.* Trends in suicide during the covid-19 pandemic. *BMJ* 2020;:m4352. doi:10.1136/bmj.m4352



- 14 Wasserman IM. The impact of epidemic, war, prohibition and media on suicide: United States, 1910-1920. *Suicide Life Threat Behav* 1992;**22**:240–54.
- 15 Chan SMS, Chiu FKH, Lam CWL, *et al*. Elderly suicide and the 2003 SARS epidemic in Hong Kong. *Int J Geriatr Psychiatry* 2006;**21**:113–8. doi:10.1002/gps.1432
- 16 Cheung YT, Chau PH, Yip PSF. A revisit on older adults suicides and Severe Acute Respiratory Syndrome (SARS) epidemic in Hong Kong. *Int J Geriatr Psychiatry* 2008;**23**:1231–8. doi:10.1002/gps.2056
- 17 *Statistics Sweden. Statistical yearbook of Sweden [Statistisk årsbok för Sverige 1914–2014].* <https://www.scb.se/hitta-statistik/aldre-statistik/innehall/statistisk-arsbok-1914-2014/>.
- 18 Holmberg M. The ghost of pandemics past: revisiting two centuries of influenza in Sweden. *Med Humanit* 2017;**43**:141–7. doi:10.1136/medhum-2016-011023
- 19 The National Board of Health and Welfare. Cause of death statistics. History, production methods and reliability [Dödsorsaksstatistik. Historik, produktionsmetoder och tillförlitlighet]. [www.socialstyrelsen.se](http://www.socialstyrelsen.se). 2010.
- 20 Statistik om dödsorsaker. Socialstyrelsen. <https://www.socialstyrelsen.se/statistik-och-data/statistik/statistikammen/dodsorsaker/> (accessed 21 Nov 2020).
- 21 Shin Y, Yu B, Greenwood-Nimmo M. Modelling Asymmetric Cointegration and Dynamic Multipliers in a Nonlinear ARDL Framework. In: Sickles RC, Horrace WC, eds. *Festschrift in Honor of Peter Schmidt: Econometric Methods and Applications*. New York: : Springer Science+Business Media 2014. 281–314.
- 22 Norstrom T, Stickley A, Shibuya K. The importance of alcoholic beverage type for suicide in Japan: a time-series analysis, 1963-2007. *Drug Alcohol Rev* 2012;**31**:251–6. doi:10.1111/j.1465-3362.2011.00300.x
- 23 Gunnell D, Lopatzidis A, Dorling D, *et al*. Suicide and unemployment in young people. Analysis of trends in England and Wales, 1921-1995. *Br J Psychiatry* 1999;**175**:263–70. doi:10.1192/bjp.175.3.263
- 24 Zortea TC, Brenna CTA, Joyce M, *et al*. The Impact of Infectious Disease-Related Public Health Emergencies on Suicide, Suicidal Behavior, and Suicidal Thoughts: A Systematic Review. *Crisis* 2020;:1–14. doi:10.1027/0227-5910/a000753
- 25 Dödligheten ökade första halvåret - covid-19 tredje vanligaste dödsorsaken - Socialstyrelsen. <https://www.socialstyrelsen.se/om-socialstyrelsen/pressrum/press/dodligheten-okade-forsta-halvaret---covid-19-tredje-vanligaste-dodsorsaken/> (accessed 21 Nov 2020).

## Figure legends

**Figure 1. Annual suicide rate (scaled on the left arithmetic Y-axis) and influenza mortality (scaled on the right logarithmic Y-axis) in Sweden in 1910-1978 per 100 000 inhabitants.** *Note:* To ease visualization, influenza death rates are reported on the logarithmic scale, while for the analysis, the logarithmic transformation was performed for suicide rates. Grey areas denote the time periods corresponding to the Spanish influenza pandemic ('S.flu', 1918-1920), the Asian influenza pandemic ('A.flu', 1957-1958), and the Hong Kong influenza pandemic ('HK.flu', 1968-1969) in Sweden.

**Figure 2. Sex-specific annual suicide rate (scaled on the left arithmetic Y-axis) and influenza mortality (scaled on the right logarithmic Y-axis) in Sweden in 1910-1978 per 100 000 inhabitants of corresponding sex.** *Note:* To ease visualization, influenza death rates are reported on the logarithmic scale, while for the analysis, the logarithmic transformation was performed for suicide rates. Grey areas denote the time periods corresponding to the Spanish influenza pandemic ('S.flu', 1918-1920), the Asian influenza pandemic ('A.flu', 1957-1958), and the Hong Kong influenza pandemic ('HK.flu', 1968-1969) in Sweden.

**Figure 3. Age-standardized death rates due to suicide and influenza (scaled on the left Y-axis) in January-June 2000-2020 and age-standardized death rates due to Covid-19 (scaled on the right Y-axis) in January-June 2020 in Sweden among men and women per 100 000 inhabitants of corresponding sex.** *Note:* Bars denote Covid-19 death rates in first half of 2020. All death rates in the figure are presented on arithmetic scales. The reported death rates are retrieved from the National Board of Health and Welfare tables published on November 17<sup>th</sup>, 2020.[25]



**Table 1. Short-term and long-term relationship of suicide rates with positive and negative changes in influenza death rates among the whole population, men, and women in 1910-1978 in Sweden**

|                                      | Whole population                 |         | Men                               |         | Women                             |         |
|--------------------------------------|----------------------------------|---------|-----------------------------------|---------|-----------------------------------|---------|
|                                      | Coeff. (95% CI)                  | p-value | Coeff. (95% CI)                   | p-value | Coeff. (95% CI)                   | p-value |
| <b>Short-term coefficients</b>       |                                  |         |                                   |         |                                   |         |
| Influenza +                          | 0.00002<br>(-0.00036 to 0.00039) | 0.931   | 0.00004<br>(-0.00034 to 0.00041)  | 0.854   | -0.00007<br>(-0.00056 to 0.00041) | 0.760   |
| Influenza –                          | 0.00103<br>(-0.00579 to 0.00785) | 0.764   | -0.00192<br>(-0.01005 to 0.00621) | 0.638   | 0.00780<br>(0.00015 to 0.01544)   | 0.046   |
| <b>Long-term coefficients</b>        |                                  |         |                                   |         |                                   |         |
| Influenza +                          | -0.00012                         | 0.998   | -0.01314                          | 0.745   | 0.11254                           | 0.538   |
| Influenza –                          | 0.00211                          | 0.962   | 0.01443                           | 0.722   | -0.10789                          | 0.544   |
| <b>Model diagnostics</b>             |                                  |         |                                   |         |                                   |         |
| Q-test for autocorrelation, $\chi^2$ | 40.160                           | 0.125   | 35.260                            | 0.273   | 31.850                            | 0.424   |
| Heteroscedasticity, $\chi^2$         | 3.649                            | 0.056   | 5.439                             | 0.020   | 1.280                             | 0.258   |
| Normality, $\chi^2$                  | 2.826                            | 0.243   | 2.237                             | 0.327   | 2.372                             | 0.305   |
| RESET, F-statistics                  | 4.656                            | 0.006   | 5.473                             | 0.023   | 1.013                             | 0.394   |
| CUSUM                                | Stabl., no str. break            | NA      | Stabl., no str. break             | NA      | Stabl., no str. break             | NA      |
| CUSUMQ                               | Stabl.                           | NA      | Stabl.                            | NA      | Stabl.                            | NA      |
| Adj. R <sup>2</sup>                  | 0.257                            | NA      | 0.300                             | NA      | 0.374                             | NA      |
| Wald <sub>SR</sub> , F-statistics    | 0.054                            | 0.817   | 0.275                             | 0.602   | 1.062                             | 0.307   |
| Wald <sub>LR</sub> , F-statistics    | 1.206                            | 0.277   | 1.176                             | 0.283   | 0.771                             | 0.384   |

*Note:* Signs as “+” and “–” denote the exposure variable being partitioned in positive and negative changes, respectively. Wald test for asymmetry in the short-term (Wald<sub>SR</sub>) and long-term (Wald<sub>LR</sub>) has a null hypothesis of no cointegration. Q-test for autocorrelation reports the results of Portmanteau test for white noise. Heteroscedasticity is measured by Breusch-Pagan/Cook-Weisberg test. Normality is measured by Jarque-Bera test. RESET statistics refers to the regression specification error tests. CUSUM and CUSUMQ refer to the tests of the cumulative sum of recursive residuals and their squares, respectively. “Stabl., no str. break” in the results of CUSUM indicates that the model was found stable and the null hypothesis of no structural break was not rejected (same applies to “Stabl.” as an output for CUSUMQ). “NA” denotes that a certain test parameter was not applicable.

**Table 2. Short-term and long-term relationship of suicide rates with positive and negative changes in influenza death rates among the whole population, men, and women in 1918-1956 in Sweden**

|                                      | Whole population                 |         | Men                               |         | Women                            |         |
|--------------------------------------|----------------------------------|---------|-----------------------------------|---------|----------------------------------|---------|
|                                      | Coeff. (95% CI)                  | p-value | Coeff. (95% CI)                   | p-value | Coeff. (95% CI)                  | p-value |
| <b>Short-term coefficients</b>       |                                  |         |                                   |         |                                  |         |
| Influenza +                          | 0.00002<br>(-0.00077 to 0.00082) | 0.955   | -0.00014<br>(-0.00102 to 0.00075) | 0.755   | 0.00098<br>(-0.00068 to 0.00263) | 0.237   |
| Influenza -                          | 0.00087<br>(-0.00643 to 0.00817) | 0.809   | -0.00132<br>(-0.01001 to 0.00741) | 0.760   | 0.00434<br>(-0.00595 to 0.01463) | 0.394   |
| <b>Long-term coefficients</b>        |                                  |         |                                   |         |                                  |         |
| Influenza +                          | 0.00011                          | 0.994   | -0.00490                          | 0.802   | 0.01403                          | 0.521   |
| Influenza -                          | 0.00103                          | 0.936   | 0.00548                           | 0.775   | -0.01098                         | 0.600   |
| <b>Model diagnostics</b>             |                                  |         |                                   |         |                                  |         |
| Q-test for autocorrelation, $\chi^2$ | 14.130                           | 0.658   | 9.674                             | 0.917   | 9.614                            | 0.919   |
| Heteroscedasticity, $\chi^2$         | 0.939                            | 0.333   | 0.768                             | 0.381   | 5.042                            | 0.025   |
| Normality, $\chi^2$                  | 0.420                            | 0.811   | 0.132                             | 0.936   | 2.383                            | 0.304   |
| RESET, F-statistics                  | 0.413                            | 0.745   | 0.764                             | 0.524   | 0.505                            | 0.683   |
| CUSUM                                | Stabl., no str. break            | NA      | Stabl., no str. break             | NA      | Stabl., no str. break            | NA      |
| CUSUMQ                               | Stabl.                           | NA      | Stabl.                            | NA      | Stabl.                           | NA      |
| Adj. R <sup>2</sup>                  | 0.309                            | NA      | 0.345                             | NA      | 0.432                            | NA      |
| Wald <sub>SR</sub> , F-statistics    | 0.056                            | 0.815   | 0.155                             | 0.697   | 0.183                            | 0.673   |
| Wald <sub>LR</sub> , F-statistics    | 1.555                            | 0.222   | 0.217                             | 0.645   | 4.479                            | 0.044   |

*Note:* Signs as “+” and “-” denote the exposure variable being partitioned in positive and negative changes, respectively. Wald test for asymmetry in the short-term (Wald<sub>SR</sub>) and long-term (Wald<sub>LR</sub>) has a null hypothesis of no cointegration. Q-test for autocorrelation reports the results of Portmanteau test for white noise. Heteroscedasticity is measured by Breusch-Pagan/Cook-Weisberg test. Normality is measured by Jarque-Bera test. RESET statistics refers to the regression specification error tests. CUSUM and CUSUMQ refer to the tests of the cumulative sum of recursive residuals and their squares, respectively. “Stabl., no str. break” in the results of CUSUM indicates that the model was found stable and the null hypothesis of no structural break was not rejected (same applies to “Stabl.” as an output for CUSUMQ). “NA” denotes that a certain test parameter was not applicable.

**Table 3. Short-term and long-term relationship of suicide rates with positive and negative changes in influenza death rates among the whole population, men, and women in 1957-1978 in Sweden**

|                                      | Whole population                  |         | Men                               |         | Women                             |         |
|--------------------------------------|-----------------------------------|---------|-----------------------------------|---------|-----------------------------------|---------|
|                                      | Coeff. (95% CI)                   | p-value | Coeff. (95% CI)                   | p-value | Coeff. (95% CI)                   | p-value |
| <b>Short-term coefficients</b>       |                                   |         |                                   |         |                                   |         |
| Influenza +                          | -0.00964<br>(-0.02252 to 0.00324) | 0.883   | -0.00876<br>(-0.02738 to 0.00985) | 0.328   | -0.00976<br>(-0.02033 to 0.00081) | 0.068   |
| Influenza –                          | 0.00194<br>(-0.02614 to 0.03003)  | 0.130   | -0.01531<br>(-0.04658 to 0.01596) | 0.309   | 0.02155<br>(-0.00343 to 0.04653)  | 0.085   |
| <b>Long-term coefficients</b>        |                                   |         |                                   |         |                                   |         |
| Influenza +                          | 0.01255                           | 0.618   | -0.02659                          | 0.541   | 0.04091                           | 0.064   |
| Influenza –                          | -0.01033                          | 0.684   | 0.024538                          | 0.582   | -0.02870                          | 0.184   |
| <b>Model diagnostics</b>             |                                   |         |                                   |         |                                   |         |
| Q-test for autocorrelation, $\chi^2$ | 5.662                             | 0.773   | 3.790                             | 0.925   | 5.243                             | 0.813   |
| Heteroscedasticity, $\chi^2$         | 0.102                             | 0.750   | 0.155                             | 0.694   | 0.079                             | 0.778   |
| Normality, $\chi^2$                  | 1.569                             | 0.456   | 1.627                             | 0.443   | 1.237                             | 0.537   |
| RESET, F-statistics                  | 5.839                             | 0.014   | 3.348                             | 0.064   | 1.089                             | 0.398   |
| CUSUM                                | Stabl., no str. break             | NA      | Stabl., no str. break             | NA      | Stabl., no str. break             | NA      |
| CUSUMQ                               | Stabl.                            | NA      | Stabl.                            | NA      | Stabl.                            | NA      |
| Adj. R <sup>2</sup>                  | 0.246                             | NA      | 0.337                             | NA      | 0.371                             | NA      |
| Wald <sub>SR</sub> , F-statistics    | 2.903                             | 0.112   | 0.536                             | 0.477   | 7.132                             | 0.019   |
| Wald <sub>LR</sub> , F-statistics    | 0.922                             | 0.354   | 0.297                             | 0.595   | 26.74                             | <0.001  |

*Note:* Signs as “+” and “–” denote the exposure variable being partitioned in positive and negative changes, respectively. Wald test for asymmetry in the short-term (Wald<sub>SR</sub>) and long-term (Wald<sub>LR</sub>) has a null hypothesis of no cointegration. Q-test for autocorrelation reports the results of Portmanteau test for white noise. Heteroscedasticity is measured by Breusch-Pagan/Cook-Weisberg test. Normality is measured by Jarque-Bera test. RESET statistics refers to the regression specification error tests. CUSUM and CUSUMQ refer to the tests of the cumulative sum of recursive residuals and their squares, respectively. “Stabl., no str. break” in the results of CUSUM indicates that the model was found stable and the null hypothesis of no structural break was not rejected (same applies to “Stabl.” as an output for CUSUMQ). “NA” denotes that a certain test parameter was not applicable.

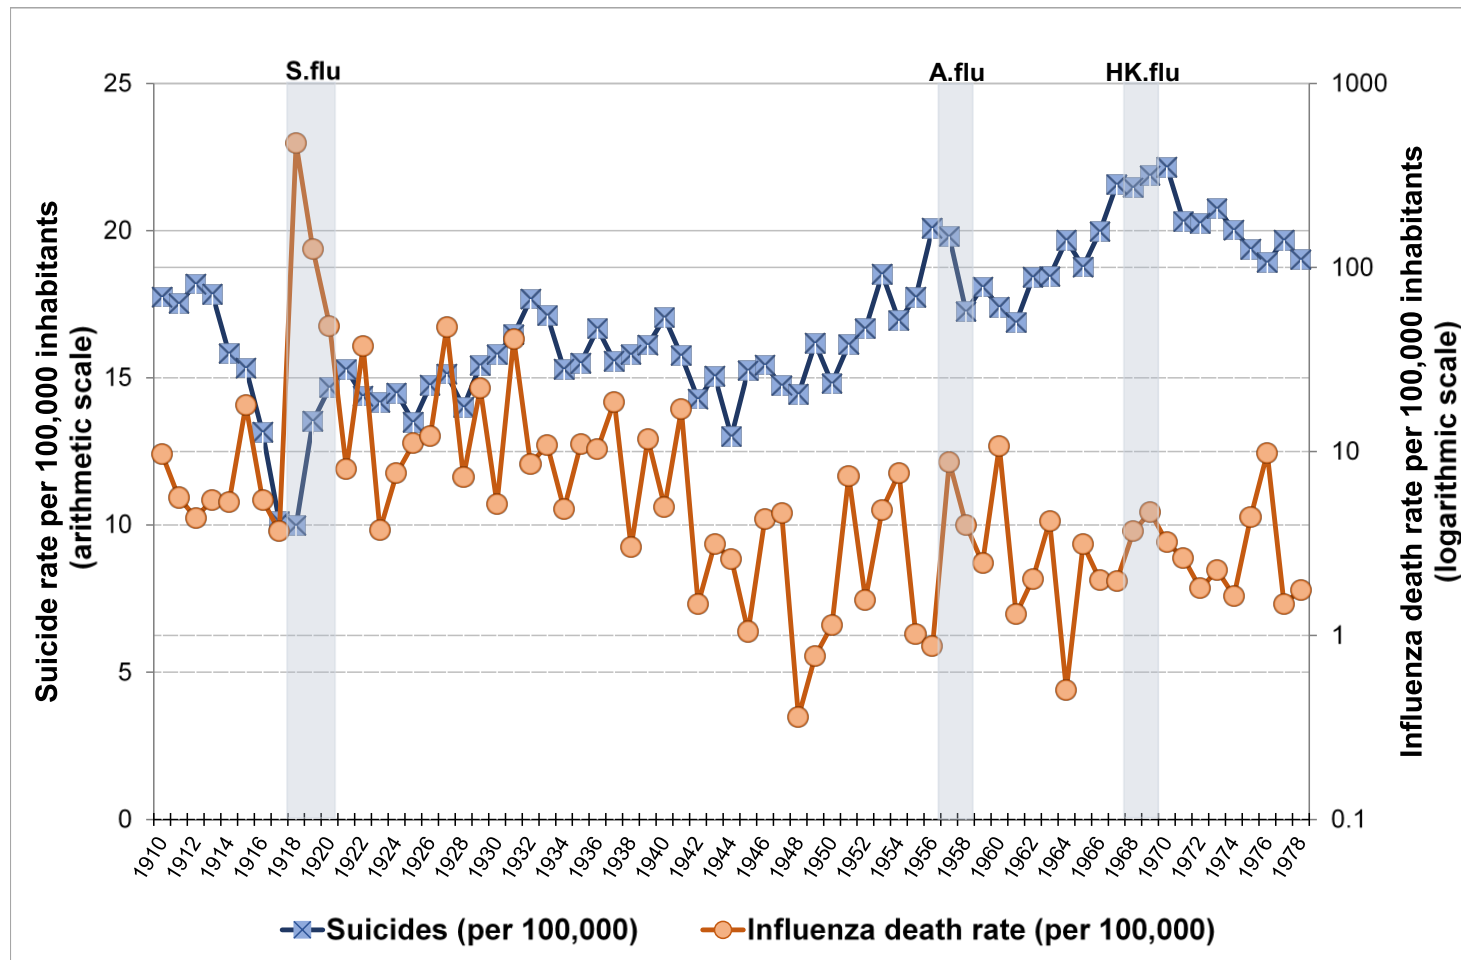

**Figure 1. Annual suicide rate (scaled on the left arithmetic Y-axis) and influenza mortality (scaled on the right logarithmic Y-axis) in Sweden in 1910-1978 per 100 000 inhabitants.** Note: To ease visualization, influenza death rates are reported on the logarithmic scale, while for the analysis, the logarithmic transformation was performed for suicide rates. Grey areas denote the time periods corresponding to the Spanish influenza pandemic ('S.flu', 1918-1920), the Asian influenza pandemic ('A.flu', 1957-1958), and the Hong Kong influenza pandemic ('HK.flu', 1968-1969) in Sweden.

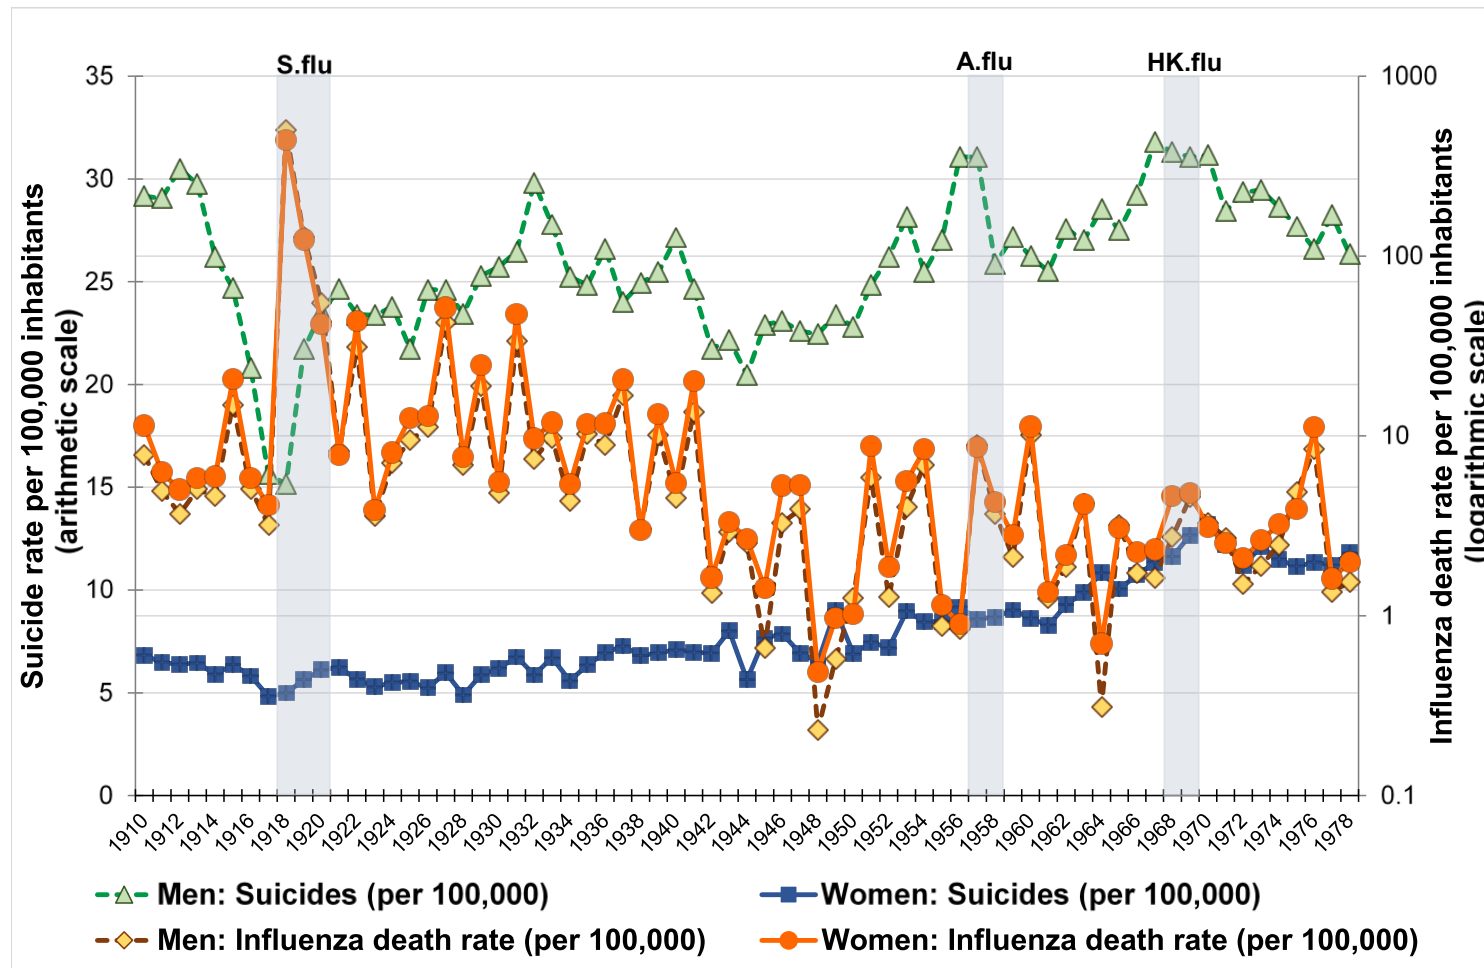

**Figure 2. Sex-specific annual suicide rate (scaled on the left arithmetic Y-axis) and influenza mortality (scaled on the right logarithmic Y-axis) in Sweden in 1910-1978 per 100,000 inhabitants of corresponding sex. Note:** To ease visualization, influenza death rates are reported on the logarithmic scale, while for the analysis, the logarithmic transformation was performed for suicide rates. Grey areas denote the time periods corresponding to the Spanish influenza pandemic ('S.flu', 1918-1920), the Asian influenza pandemic ('A.flu', 1957-1958), and the Hong Kong influenza pandemic ('HK.flu', 1968-1969) in Sweden.

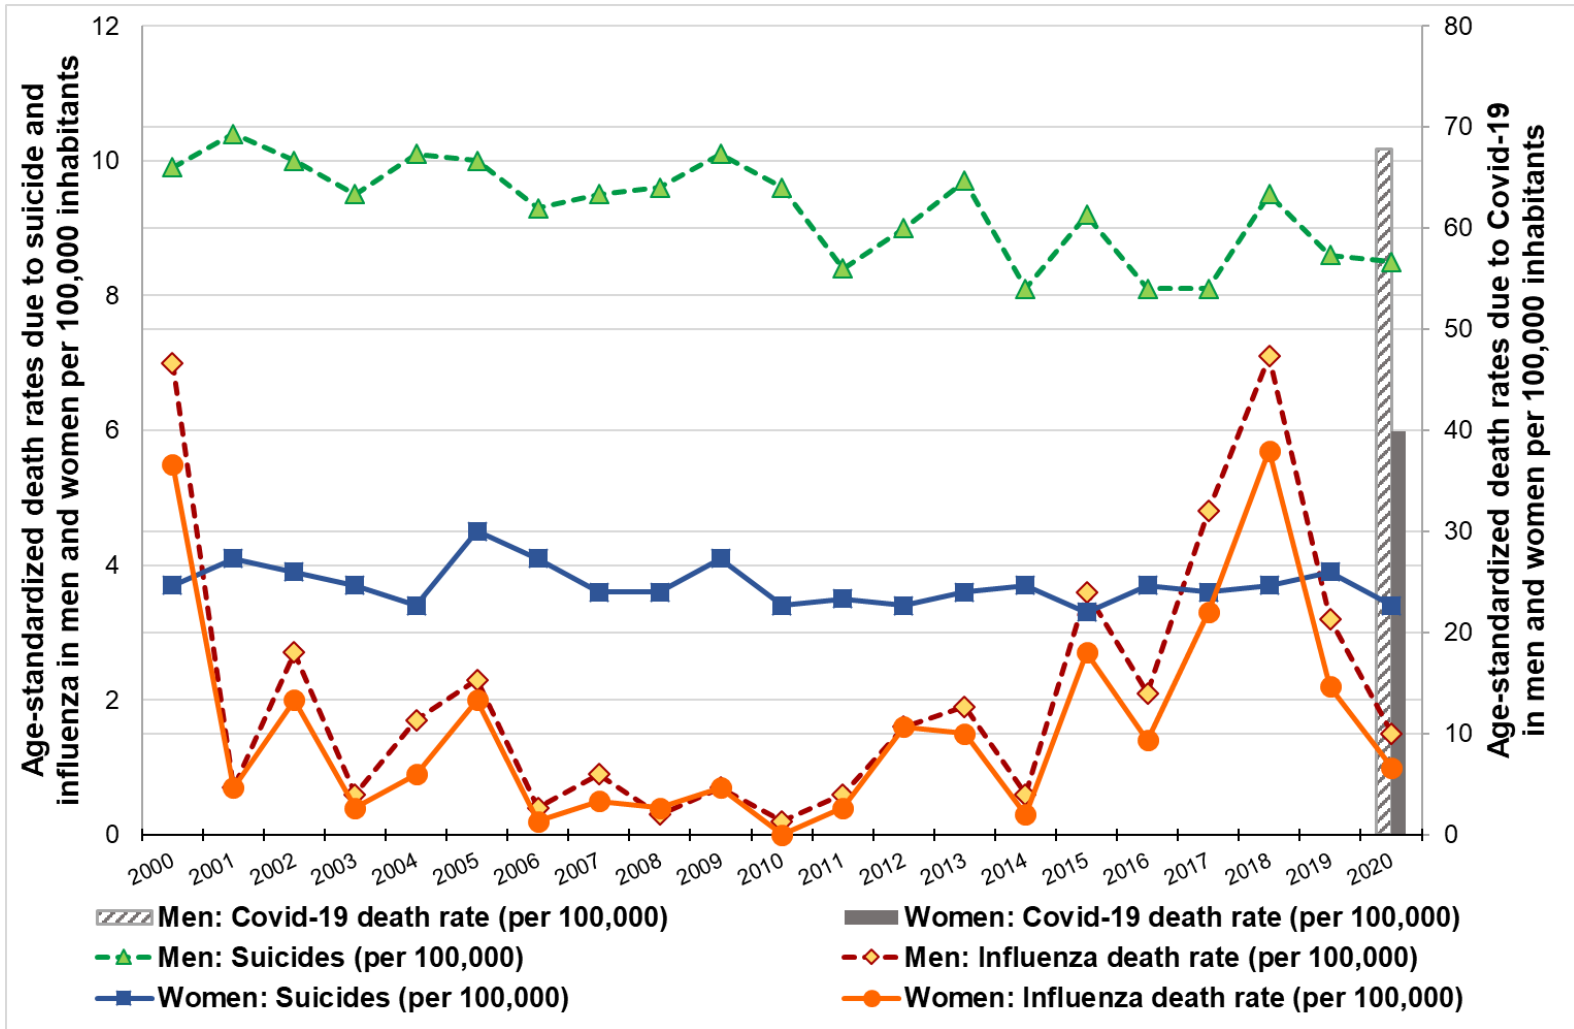

**Figure 3. Age-standardized death rates due to suicide and influenza (scaled on the left Y-axis) in January-June 2000-2020 and age-standardized death rates due to Covid-19 (scaled on the right Y-axis) in January-June 2020 in Sweden among men and women per 100 000 inhabitants of corresponding sex. Note: Bars denote Covid-19 death rates in first half of 2020. All death rates in the figure are presented on arithmetic scales. The reported death rates are retrieved from the National Board of Health and Welfare tables published on November 17<sup>th</sup>, 2020.[25]**

## Supplementary material

**eTable 1. Original data on the number of deaths by influenza and suicide, and population size for total population, men, and women in 1910-1978, retrieved from the Statistical Yearbook of Sweden from 1910-1978**

| Year | Total population, N | Men, N  | Women, N | Deaths by influenza in total population, N | Deaths by influenza among men, N | Deaths by influenza among women, N | Deaths by suicide in total population, N | Deaths by suicide among men, N | Deaths by suicide among women, N |
|------|---------------------|---------|----------|--------------------------------------------|----------------------------------|------------------------------------|------------------------------------------|--------------------------------|----------------------------------|
| 1910 | 5522403             | 2698729 | 2823674  | 534                                        | 212                              | 322                                | 980                                      | 787                            | 193                              |
| 1911 | 5561799             | 2718638 | 2843161  | 312                                        | 134                              | 178                                | 974                                      | 790                            | 184                              |
| 1912 | 5604192             | 2740737 | 2863455  | 245                                        | 101                              | 144                                | 1019                                     | 836                            | 183                              |
| 1913 | 5638583             | 2756946 | 2881637  | 307                                        | 139                              | 168                                | 1006                                     | 820                            | 186                              |
| 1914 | 5679607             | 2777447 | 2902160  | 300                                        | 128                              | 172                                | 899                                      | 728                            | 171                              |
| 1915 | 5712740             | 2794552 | 2918188  | 1018                                       | 417                              | 601                                | 876                                      | 690                            | 186                              |
| 1916 | 5757566             | 2817950 | 2939616  | 314                                        | 143                              | 171                                | 757                                      | 586                            | 171                              |
| 1917 | 5800847             | 2841554 | 2959293  | 213                                        | 91                               | 122                                | 587                                      | 444                            | 143                              |
| 1918 | 5813850             | 2849205 | 2964645  | 27379                                      | 14245                            | 13134                              | 580                                      | 432                            | 148                              |
| 1919 | 5847037             | 2868395 | 2978642  | 7341                                       | 3667                             | 3674                               | 791                                      | 623                            | 168                              |
| 1920 | 5904489             | 2898256 | 3006233  | 2853                                       | 1596                             | 1257                               | 866                                      | 682                            | 184                              |
| 1921 | 5954316             | 2925988 | 3028328  | 479                                        | 241                              | 238                                | 910                                      | 721                            | 189                              |
| 1922 | 5987520             | 2944031 | 3043489  | 2235                                       | 918                              | 1317                               | 861                                      | 689                            | 172                              |
| 1923 | 6005759             | 2948508 | 3057251  | 224                                        | 106                              | 118                                | 851                                      | 689                            | 162                              |
| 1924 | 6036118             | 2964230 | 3071888  | 458                                        | 210                              | 248                                | 874                                      | 705                            | 169                              |
| 1925 | 6053562             | 2972554 | 3081008  | 669                                        | 280                              | 389                                | 817                                      | 646                            | 171                              |
| 1926 | 6074368             | 2982625 | 3091743  | 731                                        | 335                              | 396                                | 896                                      | 734                            | 162                              |
| 1927 | 6087923             | 2990205 | 3097718  | 2875                                       | 1277                             | 1598                               | 921                                      | 736                            | 185                              |
| 1928 | 6105190             | 2999562 | 3105628  | 444                                        | 207                              | 237                                | 855                                      | 703                            | 152                              |
| 1929 | 6120080             | 3007946 | 3112134  | 1345                                       | 573                              | 772                                | 944                                      | 761                            | 183                              |
| 1930 | 6142191             | 3020848 | 3121343  | 319                                        | 146                              | 173                                | 970                                      | 777                            | 193                              |
| 1931 | 6162446             | 3037064 | 3125382  | 2518                                       | 1025                             | 1493                               | 1015                                     | 804                            | 211                              |
| 1932 | 6190364             | 3053528 | 3136836  | 531                                        | 228                              | 303                                | 1094                                     | 910                            | 184                              |
| 1933 | 6211566             | 3066888 | 3144678  | 673                                        | 300                              | 373                                | 1063                                     | 852                            | 211                              |
| 1934 | 6233090             | 3079690 | 3153400  | 303                                        | 133                              | 170                                | 953                                      | 777                            | 176                              |
| 1935 | 6250506             | 3090451 | 3160055  | 685                                        | 316                              | 369                                | 969                                      | 768                            | 201                              |
| 1936 | 6266888             | 3100534 | 3166354  | 646                                        | 275                              | 371                                | 1045                                     | 825                            | 220                              |
| 1937 | 6284722             | 3111256 | 3173466  | 1173                                       | 522                              | 651                                | 978                                      | 747                            | 231                              |
| 1938 | 6310214             | 3125000 | 3185214  | 190                                        | 95                               | 95                                 | 996                                      | 779                            | 217                              |
| 1939 | 6341303             | 3142356 | 3198947  | 740                                        | 319                              | 421                                | 1022                                     | 800                            | 222                              |
| 1940 | 6371432             | 3160128 | 3211304  | 318                                        | 142                              | 176                                | 1086                                     | 858                            | 228                              |
| 1941 | 6406474             | 3180535 | 3225939  | 1082                                       | 434                              | 648                                | 1009                                     | 784                            | 225                              |
| 1942 | 6458200             | 3207756 | 3250444  | 96                                         | 43                               | 53                                 | 922                                      | 697                            | 225                              |
| 1943 | 6522827             | 3240631 | 3282196  | 204                                        | 95                               | 109                                | 982                                      | 719                            | 263                              |
| 1944 | 6597348             | 3279723 | 3317625  | 172                                        | 83                               | 89                                 | 858                                      | 671                            | 187                              |
| 1945 | 6673749             | 3321502 | 3352247  | 70                                         | 22                               | 48                                 | 1018                                     | 761                            | 257                              |
| 1946 | 6763685             | 3366694 | 3396991  | 291                                        | 111                              | 180                                | 1044                                     | 777                            | 267                              |
| 1947 | 6842046             | 3407577 | 3434469  | 316                                        | 133                              | 183                                | 1008                                     | 770                            | 238                              |



Supplementary material

|      |         |         |         |     |     |     |      |      |     |
|------|---------|---------|---------|-----|-----|-----|------|------|-----|
| 1948 | 6924888 | 3448122 | 3476766 | 25  | 8   | 17  | 1000 | 774  | 226 |
| 1949 | 6986181 | 3479079 | 3507102 | 54  | 20  | 34  | 1130 | 814  | 316 |
| 1950 | 7041829 | 3506442 | 3535387 | 80  | 44  | 36  | 1043 | 799  | 244 |
| 1951 | 7098740 | 3535736 | 3563004 | 522 | 208 | 314 | 1145 | 879  | 266 |
| 1952 | 7150606 | 3562475 | 3588131 | 112 | 45  | 67  | 1192 | 934  | 258 |
| 1953 | 7192316 | 3583598 | 3608718 | 347 | 145 | 202 | 1332 | 1008 | 324 |
| 1954 | 7234664 | 3605013 | 3629651 | 553 | 248 | 305 | 1225 | 918  | 307 |
| 1955 | 7290112 | 3633983 | 3656129 | 74  | 32  | 42  | 1293 | 983  | 310 |
| 1956 | 7338991 | 3659917 | 3679074 | 64  | 31  | 33  | 1474 | 1137 | 337 |
| 1957 | 7388611 | 3685654 | 3702957 | 649 | 327 | 322 | 1463 | 1145 | 318 |
| 1958 | 7429675 | 3706039 | 3723636 | 297 | 137 | 160 | 1282 | 959  | 323 |
| 1959 | 7462823 | 3722867 | 3739956 | 184 | 79  | 105 | 1350 | 1012 | 338 |
| 1960 | 7497967 | 3740119 | 3757848 | 801 | 378 | 423 | 1305 | 981  | 324 |
| 1961 | 7542028 | 3763040 | 3778988 | 98  | 47  | 51  | 1273 | 960  | 313 |
| 1962 | 7581148 | 3782252 | 3798896 | 154 | 71  | 83  | 1396 | 1043 | 353 |
| 1963 | 7627507 | 3805699 | 3821808 | 319 | 160 | 159 | 1406 | 1028 | 378 |
| 1964 | 7695200 | 3840897 | 3854303 | 39  | 12  | 27  | 1514 | 1096 | 418 |
| 1965 | 7772506 | 3882473 | 3890033 | 243 | 124 | 119 | 1459 | 1068 | 391 |
| 1966 | 7843088 | 3919170 | 3923918 | 157 | 68  | 89  | 1566 | 1145 | 421 |
| 1967 | 7892774 | 3942223 | 3950551 | 156 | 64  | 92  | 1702 | 1254 | 448 |
| 1968 | 7934996 | 3961414 | 3973582 | 291 | 108 | 183 | 1702 | 1240 | 462 |

review only

1  
2  
3  
4  
5  
6  
7  
8  
9  
10  
11  
12  
13  
14  
15  
16  
17  
18  
19  
20  
21  
22  
23  
24  
25  
26  
27  
28  
29  
30  
31  
32  
33  
34  
35  
36  
37  
38  
39  
40  
41  
42  
43  
44  
45  
46

## Supplementary material

**Supplementary material. Model diagnostics**

We carried out several types of model diagnostics, including Portmanteau test for white noise to check autocorrelation in residuals, Breusch-Pagan/Cook-Weisberg test for heteroscedasticity, Jarque-Bera test on normality, and the regression specification error tests that indicates whether there is a misspecification in the model. We also performed tests for stability of the models by using the cumulative sum of recursive residuals and their squares to test whether there is a structural break due to changes in regression coefficients over time.

**Supplementary material. STATA codes for the non-linear autoregressive distributed lag (NARDL) modelling of association between influenza death rates and suicide rates**

```

clear
use "Z:\Influenza_deaths_suicides\ALL19101978.dta"

///// 1. DATA MANAGEMENT: generate and label variables to be used in the analyses

/// Labels for original variables (retrieved from the Statistical Yearbooks 1910-1978)

lab var year "Years 1910-1978"

lab var number_population_all "Total number of inhabitants (population size) in Sweden in corresponding year"
lab var number_population_men "Total number of male population in Sweden in corresponding year"
lab var number_population_women "Total number of female population in Sweden in corresponding year"

lab var number_influenza_all "Number of deaths from influenza in total population in corresponding year"
lab var number_influenza_men "Number of deaths from influenza among men in corresponding year"
lab var number_influenza_women "Number of deaths from influenza among women in corresponding year"

lab var number_suicide_all "Number of suicides in total population in corresponding year"
lab var number_suicide_men "Number of suicides among men in corresponding year"
lab var number_suicide_women "Number of suicides among women in corresponding year"

/// Calculation of annual influenza death rates and suicide rates per 100,000 for total population, men, and women

gen influenza_rates_all = (number_influenza_all/number_population_all)*100000
gen influenza_rates_men = (number_influenza_men/number_population_men)*100000
gen influenza_rates_women = (number_influenza_women/number_population_women)*100000

gen suicide_rates_all = (number_suicide_all/number_population_all)*100000
gen suicide_rates_men = (number_suicide_men/number_population_men)*100000
gen suicide_rates_women = (number_suicide_women/number_population_women)*100000

lab var influenza_rates_all "Influenza death rates for total population per 100,000, annual"
lab var influenza_rates_men "Influenza death rates among men per 100,000, annual"
lab var influenza_rates_women "Influenza death rates among women per 100,000, annual"

lab var suicide_rates_all "Suicide rates for total population per 100,000, annual"
lab var suicide_rates_men "Suicide rates among men per 100,000, annual"
lab var suicide_rates_women "Suicide rates among women per 100,000, annual"

/// Logarithmic transformation for suicide rates for total population, men, and women

```

## Supplementary material

```

1
2
3   gen ln_suicide_rates_all = ln(suicide_rates_all)
4   gen ln_suicide_rates_men = ln(suicide_rates_men)
5   gen ln_suicide_rates_women = ln(suicide_rates_women)
6
7   lab var ln_suicide_rates_all "Log-transformed suicide rates for total population per 100,000, annual"
8   lab var ln_suicide_rates_men "Log-transformed suicide rates among men per 100,000, annual"
9   lab var ln_suicide_rates_women "Log-transformed suicide rates among women per 100,000, annual"
10
11
12
13  /// Variables for changes in death registration in Sweden 1910-1978 (as dummy variables)
14
15  // based on the Bertillon criteria (prior to 1931)
16  gen registration_19101930=0
17  replace registration_19101930=1 if year<=1930
18  lab var registration_19101930 "Dummy variable for death registration in 1910-1930 (Bertillon)"
19
20  // introduced in cooperation with other Nordic countries (1931-1950)
21  gen registration_19311950=0
22  replace registration_19311950=1 if year>=1931 & year<=1950
23  lab var registration_19311950 "Dummy variable for death registration in 1931-1950 (new registration)"
24
25  // ICD-6 (1951-1957)
26  gen registration_19511957=0
27  replace registration_19511957=1 if year>=1951 & year<=1957
28  lab var registration_19511957 "Dummy variable for death registration in 1951-1957 (ICD-6)"
29
30  // ICD-7 (1958-1968)
31  gen registration_19581968=0
32  replace registration_19581968=1 if year>=1958 & year<=1968
33  lab var registration_19581968 "Dummy variable for death registration in 1958-1968 (ICD-7)"
34
35  // ICD-8 (1969-1978)
36  gen registration_1969after=0
37  replace registration_1969after=1 if year>=1969
38  lab var registration_1969after "Dummy variable for death registration in 1969 and after (ICD-8)"
39  ///////////////////////////////////////////////////////////////////
40
41
42  ///// 2. CHECKING VARIABLES' PROPERTIES AND TESTING THE CONDITIONS FOR MODELLING
43
44
45  /// Declare data to be time-series data
46  tsset year, yearly
47
48
49  /// Obtain optimal lags for each variable (for (i) augmentation in ADF and KPSS tests, and (ii) for p and q
50  parameters in NARDL).
51  /// Lags obtained for influenza death rates and logarithmically-transformed suicide rates for total population,
52  men, and women, and for time periods 1910-1978, 1918-1956, and 1957-1978
53  /// If AIC, HQIC, and SBIC information criteria indicated different lag orders, SBIC was used to select optimal
54  lags
55
56  varsoc influenza_rates_all
57  varsoc influenza_rates_all if tin(1918, 1956)
58  varsoc influenza_rates_all if tin(1957, )
59
60  varsoc influenza_rates_men

```

## Supplementary material

```
1
2
3 varsoc influenza_rates_men if tin(1918, 1956)
4 varsoc influenza_rates_men if tin(1957, )
5
6 varsoc influenza_rates_women
7 varsoc influenza_rates_women if tin(1918, 1956)
8 varsoc influenza_rates_women if tin(1957, )
9
10 varsoc ln_suicide_rates_all
11 varsoc ln_suicide_rates_all if tin(1918, 1956)
12 varsoc ln_suicide_rates_all if tin(1957, )
13
14 varsoc ln_suicide_rates_men
15 varsoc ln_suicide_rates_men if tin(1918, 1956)
16 varsoc ln_suicide_rates_men if tin(1957, )
17
18 varsoc ln_suicide_rates_women
19 varsoc ln_suicide_rates_women if tin(1918, 1956)
20 varsoc ln_suicide_rates_women if tin(1957, )
21
22 /// Tests for stationarity: ADF and KPSS for influenza death rates and logarithmically-transformed suicide rates
23 variables for total population, men, and women
24 /// Augmentation by at least one lag was used (for suicide rates in women - by two lags according to SBIC in
25 varsoc)
26
27 dfuller influenza_rates_all, lag(1)
28 dfuller influenza_rates_men, lag(1)
29 dfuller influenza_rates_women, lag(1)
30
31 dfuller ln_suicide_rates_all, lag(1)
32 dfuller ln_suicide_rates_men, lag(1)
33 dfuller ln_suicide_rates_women, lag(1)
34 dfuller ln_suicide_rates_women, lag(2)
35
36 dfuller D.influenza_rates_all, lag(1)
37 dfuller D.influenza_rates_men, lag(1)
38 dfuller D.influenza_rates_women, lag(1)
39
40 dfuller D.ln_suicide_rates_all, lag(1)
41 dfuller D.ln_suicide_rates_men, lag(1)
42 dfuller D.ln_suicide_rates_women, lag(1)
43 dfuller D.ln_suicide_rates_women, lag(2)
44
45 kpss influenza_rates_all, maxlag(1) notrend
46 kpss influenza_rates_men, maxlag(1) notrend
47 kpss influenza_rates_women, maxlag(1) notrend
48
49 kpss ln_suicide_rates_all, maxlag(1) notrend
50 kpss ln_suicide_rates_men, maxlag(1) notrend
51 kpss ln_suicide_rates_women, maxlag(2) notrend
52
53 kpss D.influenza_rates_all, maxlag(1) notrend
54 kpss D.influenza_rates_men, maxlag(1) notrend
55 kpss D.influenza_rates_women, maxlag(1) notrend
56
57 kpss D.ln_suicide_rates_all, maxlag(1) notrend
58 kpss D.ln_suicide_rates_men, maxlag(1) notrend
59 kpss D.ln_suicide_rates_women, maxlag(2) notrend
60
```

## Supplementary material

1  
2  
3  
4 *////* 3. ESTIMATION OF NON-LINEAR AUTOREGRESSIVE DISTRIBUTED LAG (NARDL) MODELS:  
5 for total population, men, and women, and for time periods 1910-1978, 1918-1956, and 1957-1978  
6 *///* The dependent and independent variables are indicated in levels.  
7 *///* The covariates (i.e., changes in death registration system 1910-1978) are included with the deterministic  
8 option, but these were only kept in the models if statistically significant.  
9 *///* The optimal number of lags for dependent and independent variables (p and q parameters, respectively).  
10 *///* Since p and q parameters refer to levels, one additional lag is added to p and q to get an optimal lag length in  
11 differences (p and q must be at least 2).  
12 *///* The model provides an output for a long-term cointegration bounds test and diagnostic tests.

13  
14 `nardl ln_suicide_rates_all influenza_rates_all, p(2) q(2) h(69) plot bootstrap(100) level(95) residuals /* used as  
15 a final model */`

16 `nardl ln_suicide_rates_all influenza_rates_all, p(2) q(2) deterministic(registration_19101930  
17 registration_19311950 registration_19511957 registration_19581968 registration_1969after) h(69) plot  
18 bootstrap(100) level(95) residuals`

19  
20 `nardl ln_suicide_rates_men influenza_rates_men, p(2) q(2) h(69) plot bootstrap(100) level(95) residuals /* used  
21 as a final model */`

22 `nardl ln_suicide_rates_men influenza_rates_men, p(2) q(2) deterministic(registration_19101930  
23 registration_19311950 registration_19511957 registration_19581968 registration_1969after) h(69) plot  
24 bootstrap(100) level(95) residuals`

25  
26 `nardl ln_suicide_rates_women influenza_rates_women, p(3) q(2) h(69) plot bootstrap(100) level(95) residuals  
27 /* used as a final model */`

28 `nardl ln_suicide_rates_women influenza_rates_women, p(3) q(2) deterministic(registration_19101930  
29 registration_19311950 registration_19511957 registration_19581968 registration_1969after) h(69) plot  
30 bootstrap(100) level(95) residuals`

31  
32 `nardl ln_suicide_rates_all influenza_rates_all if tin(1918,1956), p(2) q(2) h(39) plot bootstrap(50) level(95)  
33 residuals`

34 `nardl ln_suicide_rates_men influenza_rates_men if tin(1918,1956), p(2) q(2) h(39) plot bootstrap(50) level(95)  
35 residuals`

36 `nardl ln_suicide_rates_women influenza_rates_women if tin(1918,1956), p(5) q(2) h(39) plot bootstrap(50)  
37 level(95) residuals`

38 `nardl ln_suicide_rates_all influenza_rates_all if tin(1957, ), p(2) q(2) h(22) plot bootstrap(50) level(95) residuals`  
39 `nardl ln_suicide_rates_men influenza_rates_men if tin(1957, ), p(2) q(2) h(22) plot bootstrap(50) level(95)  
40 residuals`

41 `nardl ln_suicide_rates_women influenza_rates_women if tin(1957, ), p(2) q(2) h(22) plot bootstrap(50)  
42 level(95) residuals`

43  
44  
45 */\* REFERENCES*

46 For varsoc and dfuller:

47 StataCorp. Stata 15 Base Reference Manual. College Station, TX: Stata Press; 2017

48  
49 For kpss:

50 Author: Christopher F Baum, Boston College, USA baum@@bc.edu

51 Kwiatkowski, D., Phillips, P.C.B., Schmidt, P. and Y. Shin. Testing the null hypothesis of stationarity against  
52 the alternative of a unit root: How sure are we that economic time series have a unit root? Journal of  
53 Econometrics, 54, 1992, 159-178.

54 Lee, D. and P. Schmidt. On the power of the KPSS test of stationarity against fractionally-integrated alternatives.  
55 Journal of Econometrics, 73, 1996, 285-302.

56 Schwert, G.W. Tests for Unit Roots: A Monte Carlo Investigation. Journal of Business and Economic Statistics,  
57 7, 1989, 147-160.

58  
59 For nardl:  
60

## Supplementary material

1  
2  
3 Author: Stata implementation by Marco Sunder (sunder@wifa.uni-leipzig.de). This version was created on  
4 26jan2012.

5 Shin, Y., Yu, B., Greenwood-Nimmo, M. (2011): Modelling asymmetric cointegration and dynamic multipliers  
6 in a nonlinear ARDL framework. Working paper (version of November 2011),  
7 <http://ssrn.com/abstract=1807745>. \*/

8  
9 end of do-file  
10  
11  
12  
13  
14  
15  
16  
17  
18  
19  
20  
21  
22  
23  
24  
25  
26  
27  
28  
29  
30  
31  
32  
33  
34  
35  
36  
37  
38  
39  
40  
41  
42  
43  
44  
45  
46  
47  
48  
49  
50  
51  
52  
53  
54  
55  
56  
57  
58  
59  
60

For peer review only

Supplementary material

eTable 2. Unit root tests at the level and first difference by Augmented Dickey-Fuller (ADF) and Kwiatkowski-Phillips-Schmidt-Shin (KPSS) test statistics

|                                       | ADF at level   |         | KPSS at level  |                      | Results for stationarity at the level | ADF at first difference |         | KPSS at first difference |                      | Results for stationarity at the 1 <sup>st</sup> difference | Order of integration |
|---------------------------------------|----------------|---------|----------------|----------------------|---------------------------------------|-------------------------|---------|--------------------------|----------------------|------------------------------------------------------------|----------------------|
|                                       | Test statistic | p-value | Test statistic | p-value <sup>1</sup> |                                       | Test statistic          | p-value | Test statistic           | p-value <sup>1</sup> |                                                            |                      |
| <b>Suicide rate (log-transformed)</b> |                |         |                |                      |                                       |                         |         |                          |                      |                                                            |                      |
| All                                   | -2.181         | 0.213   | 1.980          | <0.001               | nonstationary                         | -6.640                  | <0.001  | 0.068                    | >0.1                 | stationary                                                 | 1                    |
| Males                                 | -3.230         | 0.018   | 0.964          | <0.001               | nonstationary                         | -6.512                  | <0.001  | 0.053                    | >0.1                 | stationary                                                 | 1                    |
| Females                               | -0.517         | 0.889   | 3.130          | <0.001               | nonstationary                         | -8.692                  | <0.001  | 0.104                    | >0.1                 | stationary                                                 | 1                    |
| <b>Influenza death rate</b>           |                |         |                |                      |                                       |                         |         |                          |                      |                                                            |                      |
| All                                   | -4.895         | <0.001  | 0.461          | >0.1                 | stationary                            | -8.727                  | <0.001  | <i>0.016</i>             | >0.1                 | <i>stationary</i>                                          | 0                    |
| Males                                 | -4.856         | <0.001  | 0.431          | >0.1                 | stationary                            | -8.642                  | <0.001  | <i>0.016</i>             | >0.1                 | <i>stationary</i>                                          | 0                    |
| Females                               | -4.940         | <0.001  | 0.491          | >0.1                 | stationary                            | -8.824                  | <0.001  | <i>0.015</i>             | >0.1                 | <i>stationary</i>                                          | 0                    |

Note: For the ADF test, the null hypothesis implies that the variable contains a unit root (the alternate hypothesis is that the variable is stationary), whereas for the KPSS test the null hypothesis implies that the variable is stationary (the alternate hypothesis is that there is a unit root). The results for ADF and KPSS tests for stationarity at first difference for influenza death rates are reported as explanatory (written in Italics) since the stationarity at the level has already been established (i.e., integrated of the order zero).

<sup>1</sup> KPSS test results do not indicate the exact p-value, but report the level of significance at which the null hypothesis is rejected (1%, 2.5%, 5%, or 10% significance level).

Abbreviations: ADF, Augmented Dickey-Fuller unit-root test; KPSS, Kwiatkowski-Phillips-Schmidt-Shin test for stationarity



## Supplementary material

**eTable 3. Full specification for non-linear autoregressive distributed lag models used for the analysis of short-term and long-term relationship of suicide rates with positive and negative changes in influenza death rates among the whole population, men, and women in 1910-1978 in Sweden**

|                          | Whole population               |         | Men                            |         | Women                           |         |
|--------------------------|--------------------------------|---------|--------------------------------|---------|---------------------------------|---------|
|                          | Coefficient (95% CI)           | p-value | Coefficient (95% CI)           | p-value | Coefficient (95% CI)            | p-value |
| LnSuicide, lag 1         | -0.08466 (-0.23940 to 0.07009) | 0.278   | -0.11457 (-0.30588 to 0.07674) | 0.235   | -0.04517 (-0.15832 to 0.06799)  | 0.427   |
| Influenza +, lag 1       | -0.00001 (-0.00761 to 0.00759) | 0.998   | -0.00150 (-0.01032 to 0.00732) | 0.734   | 0.00508 (-0.00366 to 0.01382)   | 0.249   |
| Influenza -, lag 1       | -0.00018 (-0.00775 to 0.00739) | 0.962   | -0.00165 (-0.01044 to 0.00714) | 0.708   | 0.00487 (-0.00383 to 0.01358)   | 0.267   |
| ΔLnSuicide, lag 1        | -0.14610 (-0.43113 to 0.13893) | 0.309   | 0.029465 (-0.27204 to 0.33097) | 0.846   | -0.65184 (-0.91785 to -0.38582) | <0.001  |
| ΔLnSuicide, lag 2        | NA                             | NA      | NA                             | NA      | -0.30807 (-0.55722 to -0.05892) | 0.016   |
| ΔInfluenza +             | 0.00002 (-0.00036 to 0.00039)  | 0.931   | 0.00004 (-0.00034 to 0.00041)  | 0.854   | -0.00007 (-0.00056 to 0.00041)  | 0.760   |
| ΔInfluenza +, lag 1      | 0.00153 (-0.00285 to 0.00590)  | 0.488   | 0.00085 (-0.00347 to 0.00518)  | 0.694   | 0.00093 (-0.00482 to 0.00668)   | 0.747   |
| ΔInfluenza -             | 0.00103 (-0.00579 to 0.00785)  | 0.764   | -0.00192 (-0.01005 to 0.00621) | 0.638   | 0.00780 (0.00015 to 0.01544)    | 0.046   |
| ΔInfluenza -, lag 1      | -0.00070 (-0.00236 to 0.00096) | 0.401   | -0.00038 (-0.00212 to 0.00136) | 0.663   | -0.000075 (-0.00289 to 0.00139) | 0.488   |
| <b>Long-term effect</b>  |                                |         |                                |         |                                 |         |
| Influenza +              | -0.00012                       | 0.998   | -0.01314                       | 0.745   | 0.11254                         | 0.538   |
| Influenza -              | 0.00211                        | 0.962   | 0.01443                        | 0.722   | -0.10789                        | 0.544   |
| <b>Model diagnostics</b> |                                |         |                                |         |                                 |         |

Supplementary material

|                                      |                                        |       |                                        |       |                                        |       |
|--------------------------------------|----------------------------------------|-------|----------------------------------------|-------|----------------------------------------|-------|
| Q-test for autocorrelation, $\chi^2$ | 40.160                                 | 0.125 | 35.260                                 | 0.273 | 31.850                                 | 0.424 |
| Heteroscedasticity, $\chi^2$         | 3.649                                  | 0.056 | 5.439                                  | 0.020 | 1.280                                  | 0.258 |
| Normality, $\chi^2$                  | 2.826                                  | 0.243 | 2.237                                  | 0.327 | 2.372                                  | 0.305 |
| RESET, F-statistics                  | 4.656                                  | 0.006 | 5.473                                  | 0.023 | 1.013                                  | 0.394 |
| CUSUM                                | Stable, no structural break            | NA    | Stable, no structural break            | NA    | Stable, no structural break            | NA    |
| CUSUMQ                               | Stable                                 | NA    | Stable                                 | NA    | Stable                                 | NA    |
| Adj. R <sup>2</sup>                  | 0.257                                  | NA    | 0.300                                  | NA    | 0.374                                  | NA    |
| Wald <sub>SR</sub> , F-statistics    | 0.054                                  | 0.817 | 0.275                                  | 0.602 | 1.062                                  | 0.307 |
| Wald <sub>LR</sub> , F-statistics    | 1.206                                  | 0.277 | 1.176                                  | 0.283 | 0.771                                  | 0.384 |
| <b>Cointegration test statistics</b> |                                        |       |                                        |       |                                        |       |
| t_BDM                                | -1.095                                 | NA    | -1.199                                 | NA    | -0.799                                 | NA    |
| F_PSS                                | 3.789                                  | NA    | 3.735                                  | NA    | 2.530                                  | NA    |
| <b>Critical values for F_PSS</b>     |                                        |       |                                        |       |                                        |       |
| 5% critical values; I(0), I(1)       | k=1: 5.055, 5.915<br>k=2: 3.947, 5.020 | NA    | k=1: 5.055, 5.915<br>k=2: 3.947, 5.020 | NA    | k=1: 5.055, 5.915<br>k=2: 3.947, 5.020 | NA    |

Note: F\_PSS denotes F-statistics for Pesaran/Shin/Smith bounds test with null hypothesis of no cointegration. Critical values are retrieved from Narayan PK (2005) for a sample size of n=70.[1] The null hypothesis of no cointegration is supported if F\_PSS statistics is lower than 5% I(0) critical value; the null hypothesis is rejected if F\_PSS statistics is greater than 5% I(1) critical value. We applied a conservative approach to considering the number of exposure variables (k), as suggested by Shin Y, et al (2014) [2] (since influenza death rates represent one exposure (k=1), while the analysis actually partitions the

## Supplementary material

1  
2 exposure to positive and negative changes ( $k=2$ ). In a given table, the results of  $F_{PSS}$  for the whole population, men, and women are lower than the reported  
3 5%  $I(0)$  critical values that accepts a null hypothesis of no cointegration.  
4

5 “LnSuicide” indicates that suicide rates were logarithmically-transformed. “ $\Delta$ ” signifies the series is differenced. Signs as “+” and “-” denote the exposure  
6 variable being partitioned in positive and negative changes, respectively. “NA” denotes that a certain test or test parameter is not applicable.

7 Number of lags used for each variable in the model are noted by “lag#”. To select the optimal number of lags to be used for choosing  $p$  and  $q$  parameters for the  
8 NARDL (i.e., numbers of lags for dependent and independent variables, respectively), we applied a varsoc command in STATA using the minimal values of  
9 Akaike Information Criterion, Schwarz’s Bayesian information criterion (SBIC), and the Hannan and Quinn information criterion information criteria. If  
10 information criteria indicated different lag orders, SBIC was used to select optimal lags. Thus, for the analysis of the whole population and men, both exposure  
11 and outcome time series were lagged once, while for analysis among women to outcome time series were lagged twice and exposure time series were lagged  
12 once.

13 Wald test for asymmetry in a short-term ( $Wald_{SR}$ ) and long-term ( $Wald_{LR}$ ) has a null hypothesis of no cointegration. Q-test for autocorrelation reports the results  
14 of Portmanteau test for white noise. Heteroscedasticity is measured by Breusch-Pagan/Cook-Weisberg test. Normality is measured by Jarque-Bera test. RESET  
15 statistics refers to the regression specification error tests. CUSUM and CUSUMQ refer to the tests of the cumulative sum of recursive residuals and their squares,  
16 respectively. “Stable, no structural break” in the results of CUSUM indicates that the model was found stable and the null hypothesis of no structural break was  
17 not rejected (same applies to “Stable” as an output for CUSUMQ).  
18  
19  
20  
21  
22  
23  
24  
25  
26  
27  
28  
29  
30  
31  
32  
33  
34  
35  
36  
37  
38  
39  
40  
41  
42  
43  
44  
45  
46

## Supplementary material

**eTable 4. Full specification for non-linear autoregressive distributed lag models used for the analysis of short-term and long-term relationship of suicide rates with positive and negative changes in influenza death rates among the whole population, men, and women in 1918-1956 in Sweden**

|                         | Whole population               |         | Men                             |         | Women                          |         |
|-------------------------|--------------------------------|---------|---------------------------------|---------|--------------------------------|---------|
|                         | Coefficient (95% CI)           | p-value | Coefficient (95% CI)            | p-value | Coefficient (95% CI)           | p-value |
| LnSuicide, lag 1        | -0.32229 (-0.73472 to 0.09015) | 0.121   | -0.26417 (-0.60333 to 0.07492)  | 0.122   | -0.36067 (-0.97384 to 0.25250) | 0.238   |
| Influenza +, lag 1      | 0.00003 (-0.00851 to 0.00858)  | 0.994   | -0.00129 (-0.011384 to 0.00879) | 0.795   | 0.00506 (-0.00682 to 0.01695)  | 0.390   |
| Influenza -, lag 1      | -0.00033 (-0.00869 to 0.00803) | 0.936   | -0.00145 (-0.01129 to 0.00840)  | 0.766   | 0.00396 (-0.00801 to 0.01593)  | 0.503   |
| ΔLnSuicide, lag 1       | -0.19387 (-0.59955 to 0.21181) | 0.337   | -0.03045 (-0.44243 to 0.38153)  | 0.881   | -0.58189 (-1.19784 to 0.03406) | 0.063   |
| ΔLnSuicide, lag 2       | NA                             | NA      | NA                              | NA      | -0.36148 (-0.91643 to 0.19346) | 0.193   |
| ΔLnSuicide, lag 3       | NA                             | NA      | NA                              | NA      | -0.11520 (-0.61658 to 0.38617) | 0.641   |
| ΔLnSuicide, lag 4       | NA                             | NA      | NA                              | NA      | 0.11306 (-0.26409 to 0.49021)  | 0.544   |
| ΔInfluenza +            | 0.00002 (-0.00077 to 0.00082)  | 0.955   | -0.00014 (-0.00102 to 0.00075)  | 0.755   | 0.00098 (-0.00068 to 0.00263)  | 0.237   |
| ΔInfluenza +, lag 1     | 0.00140 (-0.00347 to 0.00627)  | 0.561   | 0.00095 (-0.00389 to 0.00580)   | 0.691   | -0.00063 (-0.00821 to 0.00696) | 0.866   |
| ΔInfluenza -            | 0.00087 (-0.00643 to 0.00817)  | 0.809   | -0.00132 (-0.01001 to 0.00741)  | 0.760   | 0.00434 (-0.00595 to 0.01463)  | 0.394   |
| ΔInfluenza -, lag 1     | -0.00076 (-0.00256 to 0.00104) | 0.396   | -0.00044 (-0.00233 to 0.00145)  | 0.637   | -0.00052 (-0.00328 to 0.00224) | 0.704   |
| <b>Long-term effect</b> |                                |         |                                 |         |                                |         |
| Influenza +             | 0.00011                        | 0.994   | -0.00490                        | 0.802   | 0.01403                        | 0.521   |

## Supplementary material

|                                      |                                        |       |                                        |       |                                        |       |
|--------------------------------------|----------------------------------------|-------|----------------------------------------|-------|----------------------------------------|-------|
| Influenza –                          | 0.00103                                | 0.936 | 0.00548                                | 0.775 | -0.01098                               | 0.600 |
| <b>Model diagnostics</b>             |                                        |       |                                        |       |                                        |       |
| Q-test for autocorrelation, $\chi^2$ | 14.130                                 | 0.658 | 9.674                                  | 0.917 | 9.614                                  | 0.919 |
| Heteroscedasticity, $\chi^2$         | 0.939                                  | 0.333 | 0.768                                  | 0.381 | 5.042                                  | 0.025 |
| Normality, $\chi^2$                  | 0.420                                  | 0.811 | 0.132                                  | 0.936 | 2.383                                  | 0.304 |
| RESET, F-statistics                  | 0.413                                  | 0.745 | 0.764                                  | 0.524 | 0.505                                  | 0.683 |
| CUSUM                                | Stable, no structural break            | NA    | Stable, no structural break            | NA    | Stable, no structural break            | NA    |
| CUSUMQ                               | Stable                                 | NA    | Stable                                 | NA    | Stable                                 | NA    |
| Adj. R <sup>2</sup>                  | 0.309                                  | NA    | 0.345                                  | NA    | 0.432                                  | NA    |
| Wald <sub>SR</sub> , F-statistics    | 0.056                                  | 0.815 | 0.155                                  | 0.697 | 0.183                                  | 0.673 |
| Wald <sub>LR</sub> , F-statistics    | 1.555                                  | 0.222 | 0.217                                  | 0.645 | 4.479                                  | 0.044 |
| <b>Cointegration test statistics</b> |                                        |       |                                        |       |                                        |       |
| t_BDM                                | -1.596                                 | NA    | -1.591                                 | NA    | -1.207                                 | NA    |
| F_PSS                                | 1.009                                  | NA    | 1.019                                  | NA    | 1.328                                  | NA    |
| <b>Critical values for F_PSS</b>     |                                        |       |                                        |       |                                        |       |
| 5% critical values; I(0) to I(1)     | k=1: 5.260, 6.160<br>k=2: 4.133, 5.260 | NA    | k=1: 5.260, 6.160<br>k=2: 4.133, 5.260 | NA    | k=1: 5.260, 6.160<br>k=2: 4.133, 5.260 | NA    |

## Supplementary material

1  
2  
3 *Note:* F\_PSS denotes F-statistics for Pesaran/Shin/Smith bounds test with null hypothesis of no cointegration. Critical values are retrieved from Narayan PK  
4 (2005) for a sample size of n=40 [1]. The null hypothesis of no cointegration is supported if F\_PSS statistics is lower than 5% I(0) critical value; the null  
5 hypothesis is rejected if F\_PSS statistics is greater than 5% I(1) critical value. We applied a conservative approach to considering the number of exposure  
6 variables (k), as suggested by Shin Y, et al (2014) [2] (since influenza death rates represent one exposure (k=1), while the analysis actually partitions the  
7 exposure to positive and negative changes (k=2)). In a given table, the results of F\_PSS for the whole population, men, and women are lower than the reported  
8 5% I(0) critical values that accepts a null hypothesis of no cointegration.

9 “LnSuicide” indicates that suicide rates were logarithmically-transformed. “Δ” signifies the series is differenced. Signs as “+” and “-” denote the exposure  
10 variable being partitioned in positive and negative changes, respectively. “NA” denotes that a certain test or test parameter is not applicable.

11 Number of lags used for each variable in the model are noted by “lag#”. To select the optimal number of lags to be used for choosing p and q parameters for the  
12 NARDL (i.e., numbers of lags for dependent and independent variables, respectively), we applied a varsoc command in STATA using the minimal values of  
13 Akaike Information Criterion, Schwarz’s Bayesian information criterion (SBIC), and the Hannan and Quinn information criterion information criteria. If  
14 information criteria indicated different lag orders, SBIC was used to select optimal lags. Thus, for the analysis of the whole population and men, both exposure  
15 and outcome time series were lagged once, while for analysis among women, outcome time series were lagged four times and exposure time series were lagged  
16 once.

17 Wald test for asymmetry in a short-term (Wald<sub>SR</sub>) and long-term (Wald<sub>LR</sub>) has a null hypothesis of no cointegration. Q-test for autocorrelation reports the results  
18 of Portmanteau test for white noise. Heteroscedasticity is measured by Breusch-Pagan/Cook-Weisberg test. Normality is measured by Jarque-Bera test. RESET  
19 statistics refers to the regression specification error tests. CUSUM and CUSUMQ refer to the tests of the cumulative sum of recursive residuals and their squares,  
20 respectively. “Stable, no structural break” in the results of CUSUM indicates that the model was found stable and the null hypothesis of no structural break was  
21 not rejected (same applies to “Stable” as an output for CUSUMQ).  
22  
23  
24  
25  
26  
27  
28  
29  
30  
31  
32  
33  
34  
35  
36  
37  
38  
39  
40  
41  
42  
43  
44  
45  
46

## Supplementary material

**eTable 5. Full specification for non-linear autoregressive distributed lag models used for the analysis of short-term and long-term relationship of suicide rates with positive and negative changes in influenza death rates among the whole population, men, and women in 1957-1978 in Sweden**

|                                      | Whole population                |         | Men                             |         | Women                           |         |
|--------------------------------------|---------------------------------|---------|---------------------------------|---------|---------------------------------|---------|
|                                      | Coefficient (95% CI)            | p-value | Coefficient (95% CI)            | p-value | Coefficient (95% CI)            | p-value |
| LnSuicide, lag 1                     | -0.64009 (-1.15104 to -0.12914) | 0.018   | -0.52238 (-1.11901 to 0.07425)  | 0.081   | -0.66040 (-1.04522 to -0.27558) | 0.003   |
| Influenza +, lag 1                   | 0.008034 (-0.02823 to 0.04429)  | 0.640   | -0.01385 (-0.05324 to 0.02553)  | 0.461   | 0.02702 (-0.00364 to 0.05768)   | 0.079   |
| Influenza -, lag 1                   | 0.00661 (-0.02823 to 0.04429)   | 0.699   | -0.01281 (-0.054045 to 0.02841) | 0.514   | 0.01895 (-0.01066 to 0.04857)   | 0.190   |
| $\Delta$ LnSuicide, lag 1            | 0.14293 (-0.41621 to 0.70206)   | 0.590   | -0.04565 (-0.70111 to 0.60981)  | 0.883   | 0.16936 (-0.25995 to 0.59868)   | 0.409   |
| $\Delta$ Influenza +                 | -0.00964 (-0.02252 to 0.00324)  | 0.883   | -0.00876 (-0.02738 to 0.00985)  | 0.328   | -0.00976 (-0.02033 to 0.00081)  | 0.068   |
| $\Delta$ Influenza +, lag 1          | -0.01999 (-0.04573 to 0.00574)  | 0.117   | -0.01837 (-0.04871 to 0.01197)  | 0.214   | -0.01298 (-0.04073 to 0.014772) | 0.331   |
| $\Delta$ Influenza -                 | 0.00194 (-0.02614 to 0.03003)   | 0.130   | -0.01531 (-0.04658 to 0.01596)  | 0.309   | 0.02155 (-0.00343 to 0.04653)   | 0.085   |
| $\Delta$ Influenza -, lag 1          | 0.00864 (-0.00271 to 0.02000)   | 0.124   | 0.01033 (-0.00294 to 0.02359)   | 0.116   | 0.00585 (-0.00565 to 0.01735)   | 0.292   |
| <b>Long-term effect</b>              |                                 |         |                                 |         |                                 |         |
| Influenza +                          | 0.01255                         | 0.618   | -0.02659                        | 0.541   | 0.04091                         | 0.064   |
| Influenza -                          | -0.01033                        | 0.684   | 0.024538                        | 0.582   | -0.02870                        | 0.184   |
| <b>Model diagnostics</b>             |                                 |         |                                 |         |                                 |         |
| Q-test for autocorrelation, $\chi^2$ | 5.662                           | 0.773   | 3.790                           | 0.925   | 5.243                           | 0.813   |



Supplementary material

|                                      |                                        |       |                                        |       |                                        |        |
|--------------------------------------|----------------------------------------|-------|----------------------------------------|-------|----------------------------------------|--------|
| Heteroscedasticity, $\chi^2$         | 0.102                                  | 0.750 | 0.155                                  | 0.694 | 0.079                                  | 0.778  |
| Normality, $\chi^2$                  | 1.569                                  | 0.456 | 1.627                                  | 0.443 | 1.237                                  | 0.537  |
| RESET, F-statistics                  | 5.839                                  | 0.014 | 3.348                                  | 0.064 | 1.089                                  | 0.398  |
| CUSUM                                | Stable, no structural break            | NA    | Stable, no structural break            | NA    | Stable, no structural break            | NA     |
| CUSUMQ                               | Stable                                 | NA    | Stable                                 | NA    | Stable                                 | NA     |
| Adj. R <sup>2</sup>                  | 0.246                                  | NA    | 0.337                                  | NA    | 0.371                                  | NA     |
| Wald <sub>SR</sub> , F-statistics    | 2.903                                  | 0.112 | 0.536                                  | 0.477 | 7.132                                  | 0.019  |
| Wald <sub>LR</sub> , F-statistics    | 0.922                                  | 0.354 | 0.297                                  | 0.595 | 26.74                                  | <0.001 |
| <b>Cointegration test statistics</b> |                                        |       |                                        |       |                                        |        |
| t_BDM                                | -2.706                                 | NA    | -1.891                                 | NA    | -3.707                                 | NA     |
| F_PSS                                | 2.649                                  | NA    | 2.075                                  | NA    | 4.688                                  | NA     |
| <b>Critical values for F_PSS</b>     |                                        |       |                                        |       |                                        |        |
| 5% critical values; I(0), I(1)       | k=1: 5.395, 6.350<br>k=2: 4.267, 5.473 | NA    | k=1: 5.395, 6.350<br>k=2: 4.267, 5.473 | NA    | k=1: 5.395, 6.350<br>k=2: 4.267, 5.473 | NA     |

Note: F\_PSS denotes F-statistics for Pesaran/Shin/Smith bounds test with null hypothesis of no cointegration. Critical values are retrieved from Narayan PK (2005) for a sample size of n=30 [1]. The null hypothesis of no cointegration is supported if F\_PSS statistics is lower than 5% I(0) critical value; the null hypothesis is rejected if F\_PSS statistics is greater than 5% I(1) critical value. We applied a conservative approach to considering the number of exposure variables (k), as suggested by Shin Y, et al (2014) [2] (since influenza death rates represent one exposure (k=1), while the analysis actually partitions the exposure to positive and negative changes (k=2)). In a given table, the results of F\_PSS for the whole population, men, and women are lower than the reported 5% I(0) critical values that accepts a null hypothesis of no cointegration.

## Supplementary material

1  
2  
3 “LnSuicide” indicates that suicide rates were logarithmically-transformed. “ $\Delta$ ” signifies the series is differenced. Signs as “+” and “-” denote the exposure  
4 variable being partitioned in positive and negative changes, respectively. “NA” denotes that a certain test or test parameter is not applicable.

5 Number of lags used for each variable in the model are noted by “lag#”. To select the optimal number of lags to be used for choosing p and q parameters for the  
6 NARDL (i.e., numbers of lags for dependent and independent variables, respectively), we applied a varsoc command in STATA using the minimal values of  
7 Akaike Information Criterion, Schwarz’s Bayesian information criterion (SBIC), and the Hannan and Quinn information criterion information criteria. If  
8 information criteria indicated different lag orders, SBIC was used to select optimal lags. Thus, for the analysis of the whole population, men, and women, both  
9 exposure and outcome time series were lagged once.

10 Wald test for asymmetry in a short-term ( $Wald_{SR}$ ) and long-term ( $Wald_{LR}$ ) has a null hypothesis of no cointegration. Q-test for autocorrelation reports the results  
11 of Portmanteau test for white noise. Heteroscedasticity is measured by Breusch-Pagan/Cook-Weisberg test. Normality is measured by Jarque-Bera test. RESET  
12 statistics refers to the regression specification error tests. CUSUM and CUSUMQ refer to the tests of the cumulative sum of recursive residuals and their squares,  
13 respectively. “Stable, no structural break” in the results of CUSUM indicates that the model was found stable and the null hypothesis of no structural break was  
14 not rejected (same applies to “Stable” as an output for CUSUMQ).

## REFERENCES

- 15  
16  
17  
18 1 Narayan PK. The saving and investment nexus for China: evidence from cointegration tests. *Applied Economics* 2005; **37**(17): 1979–1990.  
19 2 Shin Y, Yu B, Greenwood-Nimmo M. Modelling Asymmetric Cointegration and Dynamic Multipliers in a Nonlinear ARDL Framework. In: Sickles  
20 RC, Horrace WC, eds. *Festschrift in Honor of Peter Schmidt: Econometric Methods and Applications*. New York: Springer Science+Business Media,  
21 2014: 281–314.  
22  
23  
24  
25  
26  
27  
28  
29  
30  
31  
32  
33  
34  
35  
36  
37  
38  
39  
40  
41  
42  
43  
44  
45  
46

## STROBE Statement—checklist of items that should be included in reports of observational studies

|                              | Item No                                                                                                                                                                                                                                                                                                   | Recommendation                                                                                                                                                                                                                                                                                                                                                                                                                                                         | Page No |
|------------------------------|-----------------------------------------------------------------------------------------------------------------------------------------------------------------------------------------------------------------------------------------------------------------------------------------------------------|------------------------------------------------------------------------------------------------------------------------------------------------------------------------------------------------------------------------------------------------------------------------------------------------------------------------------------------------------------------------------------------------------------------------------------------------------------------------|---------|
| <b>Title and abstract</b>    | 1                                                                                                                                                                                                                                                                                                         | (a) Indicate the study's design with a commonly used term in the title or the abstract                                                                                                                                                                                                                                                                                                                                                                                 | 1       |
|                              |                                                                                                                                                                                                                                                                                                           | (b) Provide in the abstract an informative and balanced summary of what was done and what was found                                                                                                                                                                                                                                                                                                                                                                    | 2       |
| <b>Introduction</b>          |                                                                                                                                                                                                                                                                                                           |                                                                                                                                                                                                                                                                                                                                                                                                                                                                        |         |
| Background/rationale         | 2                                                                                                                                                                                                                                                                                                         | Explain the scientific background and rationale for the investigation being reported                                                                                                                                                                                                                                                                                                                                                                                   | 3       |
| Objectives                   | 3                                                                                                                                                                                                                                                                                                         | State specific objectives, including any prespecified hypotheses                                                                                                                                                                                                                                                                                                                                                                                                       | 3       |
| <b>Methods</b>               |                                                                                                                                                                                                                                                                                                           |                                                                                                                                                                                                                                                                                                                                                                                                                                                                        |         |
| Study design                 | 4                                                                                                                                                                                                                                                                                                         | Present key elements of study design early in the paper                                                                                                                                                                                                                                                                                                                                                                                                                | 3-4     |
| Setting                      | 5                                                                                                                                                                                                                                                                                                         | Describe the setting, locations, and relevant dates, including periods of recruitment, exposure, follow-up, and data collection                                                                                                                                                                                                                                                                                                                                        | 3-5     |
| Participants                 | 6                                                                                                                                                                                                                                                                                                         | (a) <i>Cohort study</i> —Give the eligibility criteria, and the sources and methods of selection of participants. Describe methods of follow-up<br><i>Case-control study</i> —Give the eligibility criteria, and the sources and methods of case ascertainment and control selection. Give the rationale for the choice of cases and controls<br><i>Cross-sectional study</i> —Give the eligibility criteria, and the sources and methods of selection of participants | 3-5     |
|                              |                                                                                                                                                                                                                                                                                                           | (b) <i>Cohort study</i> —For matched studies, give matching criteria and number of exposed and unexposed<br><i>Case-control study</i> —For matched studies, give matching criteria and the number of controls per case                                                                                                                                                                                                                                                 | n/a     |
| Variables                    | 7                                                                                                                                                                                                                                                                                                         | Clearly define all outcomes, exposures, predictors, potential confounders, and effect modifiers. Give diagnostic criteria, if applicable                                                                                                                                                                                                                                                                                                                               | 3-4     |
| Data sources/<br>measurement | 8*                                                                                                                                                                                                                                                                                                        | For each variable of interest, give sources of data and details of methods of assessment (measurement). Describe comparability of assessment methods if there is more than one group                                                                                                                                                                                                                                                                                   | 3-4     |
| Bias                         | 9                                                                                                                                                                                                                                                                                                         | Describe any efforts to address potential sources of bias                                                                                                                                                                                                                                                                                                                                                                                                              | 4       |
| Study size                   | 10                                                                                                                                                                                                                                                                                                        | Explain how the study size was arrived at                                                                                                                                                                                                                                                                                                                                                                                                                              | 4       |
| Quantitative variables       | 11                                                                                                                                                                                                                                                                                                        | Explain how quantitative variables were handled in the analyses. If applicable, describe which groupings were chosen and why                                                                                                                                                                                                                                                                                                                                           | 5       |
| Statistical methods          | 12                                                                                                                                                                                                                                                                                                        | (a) Describe all statistical methods, including those used to control for confounding                                                                                                                                                                                                                                                                                                                                                                                  | 5       |
|                              |                                                                                                                                                                                                                                                                                                           | (b) Describe any methods used to examine subgroups and interactions                                                                                                                                                                                                                                                                                                                                                                                                    | 5       |
|                              | (c) Explain how missing data were addressed                                                                                                                                                                                                                                                               | n/a                                                                                                                                                                                                                                                                                                                                                                                                                                                                    |         |
|                              | (d) <i>Cohort study</i> —If applicable, explain how loss to follow-up was addressed<br><i>Case-control study</i> —If applicable, explain how matching of cases and controls was addressed<br><i>Cross-sectional study</i> —If applicable, describe analytical methods taking account of sampling strategy | n/a                                                                                                                                                                                                                                                                                                                                                                                                                                                                    |         |
|                              | (e) Describe any sensitivity analyses                                                                                                                                                                                                                                                                     | n/a                                                                                                                                                                                                                                                                                                                                                                                                                                                                    |         |

Continued on next page

| <b>Results</b>           |     |                                                                                                                                                                                                              |                |
|--------------------------|-----|--------------------------------------------------------------------------------------------------------------------------------------------------------------------------------------------------------------|----------------|
| Participants             | 13* | (a) Report numbers of individuals at each stage of study—eg numbers potentially eligible, examined for eligibility, confirmed eligible, included in the study, completing follow-up, and analysed            | n/a            |
|                          |     | (b) Give reasons for non-participation at each stage                                                                                                                                                         | n/a            |
|                          |     | (c) Consider use of a flow diagram                                                                                                                                                                           | n/a            |
| Descriptive data         | 14* | (a) Give characteristics of study participants (eg demographic, clinical, social) and information on exposures and potential confounders                                                                     | 5-7            |
|                          |     | (b) Indicate number of participants with missing data for each variable of interest                                                                                                                          | n/a            |
|                          |     | (c) <i>Cohort study</i> —Summarise follow-up time (eg, average and total amount)                                                                                                                             | n/a            |
| Outcome data             | 15* | <i>Cohort study</i> —Report numbers of outcome events or summary measures over time                                                                                                                          | 6-7            |
|                          |     | <i>Case-control study</i> —Report numbers in each exposure category, or summary measures of exposure                                                                                                         |                |
|                          |     | <i>Cross-sectional study</i> —Report numbers of outcome events or summary measures                                                                                                                           |                |
| Main results             | 16  | (a) Give unadjusted estimates and, if applicable, confounder-adjusted estimates and their precision (eg, 95% confidence interval). Make clear which confounders were adjusted for and why they were included | 5-7, and 13-15 |
|                          |     | (b) Report category boundaries when continuous variables were categorized                                                                                                                                    |                |
|                          |     | (c) If relevant, consider translating estimates of relative risk into absolute risk for a meaningful time period                                                                                             |                |
| Other analyses           | 17  | Report other analyses done—eg analyses of subgroups and interactions, and sensitivity analyses                                                                                                               |                |
| <b>Discussion</b>        |     |                                                                                                                                                                                                              |                |
| Key results              | 18  | Summarise key results with reference to study objectives                                                                                                                                                     | 7              |
| Limitations              | 19  | Discuss limitations of the study, taking into account sources of potential bias or imprecision. Discuss both direction and magnitude of any potential bias                                                   | 8              |
| Interpretation           | 20  | Give a cautious overall interpretation of results considering objectives, limitations, multiplicity of analyses, results from similar studies, and other relevant evidence                                   | 7-8            |
| Generalisability         | 21  | Discuss the generalisability (external validity) of the study results                                                                                                                                        | 8              |
| <b>Other information</b> |     |                                                                                                                                                                                                              |                |
| Funding                  | 22  | Give the source of funding and the role of the funders for the present study and, if applicable, for the original study on which the present article is based                                                | 9              |

\*Give information separately for cases and controls in case-control studies and, if applicable, for exposed and unexposed groups in cohort and cross-sectional studies.

**Note:** An Explanation and Elaboration article discusses each checklist item and gives methodological background and published examples of transparent reporting. The STROBE checklist is best used in conjunction with this article (freely available on the Web sites of PLoS Medicine at <http://www.plosmedicine.org/>, Annals of Internal Medicine at <http://www.annals.org/>, and Epidemiology at <http://www.epidem.com/>). Information on the STROBE Initiative is available at [www.strobe-statement.org](http://www.strobe-statement.org).

# BMJ Open

## A Swedish nationwide time series analysis of influenza and suicide deaths from 1910 to 1978

|                                 |                                                                                                                                                                                                                                                                                                                                                                                                                                                                                             |
|---------------------------------|---------------------------------------------------------------------------------------------------------------------------------------------------------------------------------------------------------------------------------------------------------------------------------------------------------------------------------------------------------------------------------------------------------------------------------------------------------------------------------------------|
| Journal:                        | <i>BMJ Open</i>                                                                                                                                                                                                                                                                                                                                                                                                                                                                             |
| Manuscript ID                   | bmjopen-2021-049302.R1                                                                                                                                                                                                                                                                                                                                                                                                                                                                      |
| Article Type:                   | Original research                                                                                                                                                                                                                                                                                                                                                                                                                                                                           |
| Date Submitted by the Author:   | 13-May-2021                                                                                                                                                                                                                                                                                                                                                                                                                                                                                 |
| Complete List of Authors:       | Rück, Christian; Karolinska Institutet, Department of Clinical Neuroscience, Center for Psychiatry Research<br>Mataix-Cols, David; Karolinska Institutet, Department of Clinical Neuroscience, Center for Psychiatry Research<br>Malki, Kinda; Karolinska Institutet<br>Adler, Mats; Karolinska Institutet<br>Flygare, Oskar; Karolinska Institutet<br>Runeson, Bo; Karolinska Institutet, Clin Neuroscience<br>Sidorchuk, Anna; Karolinska Institutet Department of Clinical Neuroscience, |
| <b>Primary Subject Heading</b>: | Mental health                                                                                                                                                                                                                                                                                                                                                                                                                                                                               |
| Secondary Subject Heading:      | Epidemiology, Public health                                                                                                                                                                                                                                                                                                                                                                                                                                                                 |
| Keywords:                       | MENTAL HEALTH, COVID-19, Suicide & self-harm < PSYCHIATRY                                                                                                                                                                                                                                                                                                                                                                                                                                   |
|                                 |                                                                                                                                                                                                                                                                                                                                                                                                                                                                                             |

SCHOLARONE™  
Manuscripts



I, the Submitting Author has the right to grant and does grant on behalf of all authors of the Work (as defined in the below author licence), an exclusive licence and/or a non-exclusive licence for contributions from authors who are: i) UK Crown employees; ii) where BMJ has agreed a CC-BY licence shall apply, and/or iii) in accordance with the terms applicable for US Federal Government officers or employees acting as part of their official duties; on a worldwide, perpetual, irrevocable, royalty-free basis to BMJ Publishing Group Ltd ("BMJ") its licensees and where the relevant Journal is co-owned by BMJ to the co-owners of the Journal, to publish the Work in this journal and any other BMJ products and to exploit all rights, as set out in our [licence](#).

The Submitting Author accepts and understands that any supply made under these terms is made by BMJ to the Submitting Author unless you are acting as an employee on behalf of your employer or a postgraduate student of an affiliated institution which is paying any applicable article publishing charge ("APC") for Open Access articles. Where the Submitting Author wishes to make the Work available on an Open Access basis (and intends to pay the relevant APC), the terms of reuse of such Open Access shall be governed by a Creative Commons licence – details of these licences and which [Creative Commons](#) licence will apply to this Work are set out in our licence referred to above.

Other than as permitted in any relevant BMJ Author's Self Archiving Policies, I confirm this Work has not been accepted for publication elsewhere, is not being considered for publication elsewhere and does not duplicate material already published. I confirm all authors consent to publication of this Work and authorise the granting of this licence.

Word count  
Abstract: 231  
Body: 3532  
Tables: 3  
Figures: 2

1  
2  
3  
4  
5  
6  
7  
8  
9  
10  
11  
12  
13 **A Swedish nationwide time series analysis of influenza and suicide deaths from 1910 to**  
14 **1978**  
15  
16

17  
18 Christian Rück, M.D.<sup>1</sup>, David Mataix-Cols, Ph.D.<sup>1</sup>, Kinda Malki, M.D. <sup>1</sup>, Mats Adler, M.D. <sup>1</sup>,  
19 Oskar Flygare, M.Sc.<sup>1</sup>, Bo Runeson, M.D. <sup>1</sup>, Anna Sidorchuk, M.D.<sup>1</sup>  
20  
21  
22  
23  
24  
25

26 Corresponding author:

27 Professor Christian Rück, M46, Karolinska University Hospital Huddinge, SE-14186  
28 Huddinge, Sweden E-mail: [Christian.ruck@ki.se](mailto:Christian.ruck@ki.se), telephone +46704843392.  
29  
30  
31

32 Affiliation:

33 1. Centre for Psychiatry Research, Department of Clinical Neuroscience,  
34 Karolinska Institutet, & Stockholm Health Care Services, Region Stockholm, Sweden  
35  
36  
37  
38  
39  
40  
41  
42  
43  
44  
45  
46  
47  
48  
49  
50  
51  
52  
53  
54  
55  
56  
57  
58  
59  
60

## ABSTRACT

**Objectives:** There is concern that the COVID-19 pandemic will be associated to a surge of suicides, but evidence supporting a link between pandemics and suicide is limited. Using data from the three influenza pandemics of the 20<sup>th</sup> century, we aimed to investigate whether an association exists between influenza deaths and suicide deaths.

**Design:** Time series analysis.

**Setting:** Sweden.

**Participants:** Deaths from influenza and suicides extracted from the Statistical Yearbook of Sweden for 1910-1978, covering three pandemics (the Spanish flu, the Asian flu and the Hong-Kong flu).

**Main outcome measures:** Annual suicide rates in Sweden among the whole population, men, and women. Non-linear autoregressive distributed lag (NARDL) models was implemented to explore if there is a short-term and/or long-term relationship of increases and decreases in influenza death rates with suicide rates during 1910-1978.

**Results:** Between 1910-1978, there was no evidence of either short-term or long-term significant associations between influenza death rates and changes in suicides ( $\beta$ -coefficients of 0.00002,  $P=0.931$  and  $\beta=0.00103$ ,  $P=0.764$  for short-term relationship of increases and decreases in influenza death rates, respectively, with suicide rates, and  $\beta=-0.0002$ ,  $P=0.998$  and  $\beta=0.00211$ ,  $P=0.962$  for long-term relationship of increases and decreases in influenza death rates, respectively, with suicide rates). The same pattern emerged in separate analyses for men and women.

**Conclusions:** We found no evidence of short or long-term association between influenza death rates and suicide death rates across three 20<sup>th</sup> century pandemics.

**Key words:** pandemics, suicide, mental health, Spanish flu, Asian influenza, Hong-Kong influenza, COVID-19

### Strengths and limitations of this study

- To our knowledge, this is the first study to investigate the association between influenza deaths and suicide across several pandemics.
- The large amount of nationwide data on influenza and suicide death rates covering 1910-1978 is a strength of the study.
- To guard against effects of changes in the recording of causes of death, we created a series of dummy variables for each corresponding period but no significant effects were found.
- No historical data with higher temporal resolution than yearly data could affect the results if the time sequence of association between changes in influenza death and suicide differ from the chosen time interval.



## INTRODUCTION

Various international surveys have documented a negative impact of the COVID-19 pandemic on the population's mental health, with increased levels of psychological stress, psychiatric symptoms, insomnia, and alcohol consumption.[1–4] Whether these acute impacts will persist long term is currently unknown. The Royal College of Psychiatrists in the UK and the World Health Organization as well as the International Academy of Suicide Research have raised concerns of a possible increase in suicide rates.[5–7] Such concerns originate from a combination of known risk factors for suicide, including the impacts of social distancing and disconnectedness, an economic downturn, the decreased access to mental health services, and increased access to lethal means exemplified by an increase in gun purchases in the US.[8] For example, a study of the economic recession in USA 2007-2009 found that for every percentage point increase in the unemployment rate, there was about a 1.6 per cent increase in the suicide rate.[9,10] These findings have been questioned. A study using an interrupted time-series analysis taking e.g. seasonality and long-term trends into account, found little evidence that the recession resulted in net excess suicides across all age and gender groups.[11] However, there was some evidence of excess suicides among men aged 65 and above 65 and young women. Another study failed to find an increase in suicide rates in Sweden during the two most recent economic recessions.[12]

While the concern is widespread, there is currently little evidence to support a clear association between the ongoing COVID-19 outbreak and an increased risk of suicide. Data from the US Centers for Disease Control and Prevention shows that suicide decreased in 2020, compared to the preceding year.[13] Data from April to October 2020 from the UK did not show an increase of suicides.[14] The first months of the COVID-19 pandemic in 21 countries was studied by Pirkis and colleagues and overall there was no support for an increase in suicides.[15] Other reports highlight that the outcomes differ and that certain minorities may be at higher risk.[16]

Historic US mortality data from the largest pandemic in the 20<sup>th</sup> century, the Spanish flu, showed that the Spanish flu was associated with an increase in suicides but those effects may have been mitigated by a decline in alcohol consumption.[17] Suicide during the same pandemic in Taiwan, where the Japanese Colonial Government implemented physical distancing, school closings and prohibited religious activities, was studied in a paper by Chang and colleagues.[18] They reported a small and shortlived increase of suicides in the second wave of the pandemic. A study of the impact of social distancing measures on suicide in 1918 in the US was studied and showed that increasing social distancing was associated with suicide rates independent of the influenza mortality rate.[19] In Sweden, there were measures in place in Sweden during the Spanish Flu to minimize the spread of the disease, such as school closings, and public gatherings, cinemas and religious meetings were temporarily stopped in some places.[20]

The outbreak of the Severe Acute Respiratory Syndrome (SARS) epidemic in 2003 in Hong Kong was according to two studies associated with an increase of suicide in the population above the age of 65.[21,22] In the first of these two reports, the association was only statistically significant in elderly women.[21] Another study of suicides during SARS suggested that disconnectedness and fear of contracting SARS were more prevalent in older

1  
2  
3 adult SARS-related suicide victims than non-SARS-related suicide victims. However, this  
4 was based on a small number of suicides.[23] To summarise, at present, our understanding of  
5 the effects of pandemics on suicide rates is very limited.  
6

7  
8 The availability of high-quality historical data on mortality due to influenza and suicide in  
9 Sweden provides a unique opportunity to examine this important question. While we at  
10 present have some short-term data on the rates of suicide during the COVID-19 pandemic, a  
11 better understanding of what may be the outcome in the longer run would be valuable. Using  
12 historical data from the three major influenza pandemics of the 20<sup>th</sup> century, we aimed to  
13 formally investigate whether an association between influenza deaths and suicide deaths  
14 exists. We hypothesize that such association, if any, would likely be weak. Given the  
15 substantial sex differences in suicidal behaviour and the studies suggesting sex-specific  
16 effects during SARS,[21] we additionally report on associations separately in men and  
17 women.  
18  
19

## 20 21 22 **METHODS**

### 23 24 **Data acquisition**

25 Annual data on influenza death rates and suicide rates were estimated based on information  
26 from the Statistical Yearbook of Sweden from 1910-1978.[24] Over this period, Sweden was  
27 hit by three influenza pandemics which occurred during different socio-political contexts,  
28 namely the Spanish flu (1918-1920, with the first case appearing in Sweden in June 1918), the  
29 Asian flu (1957-1958, being first documented in August 1957), and the Hong Kong flu (1968-  
30 1969, starting in the autumn of 1968).[20] The yearbooks were produced by Statistics  
31 Sweden, a governmental agency responsible for the official statistics in Sweden, with a  
32 history of population statistics going back to the 18<sup>th</sup> century.[24] For each year from 1910 to  
33 1978, we retrieved information on the total population of Sweden, the number of deaths by  
34 influenza (if death cause was indicated as “influenza”) and the number of suicides (if death  
35 cause was indicated as “suicide”), as well as the corresponding data separately for men and  
36 women. Since yearbooks reported data retrospectively for several years prior to the year each  
37 book was published, we checked the correctness of retrieved data by comparing yearbooks  
38 with overlapping reporting periods. We constructed influenza mortality rates and suicide rates  
39 per 100 000 inhabitants for each year by dividing the number of deaths by influenza and,  
40 separately, suicide, by the total number of individuals registered in Sweden in a corresponding  
41 year and then multiplying by 100 000. The corresponding rates for men and women were  
42 constructed likewise. In addition, we collected information on the changes in registration of  
43 deaths in Sweden that included the cause of death classification based on the Bertillon criteria  
44 (prior to 1931), the new classification introduced in cooperation with statistical authorities  
45 from other Nordic countries (1931-1950), the International Classification of Diseases (ICD)  
46 Sixth Revision (ICD-6; 1951-1957), ICD-7 (1958-1968), and ICD-8 (1969-1978).[25] To  
47 capture a potential effect of changes in classification, we created a series of dummy variables  
48 for each corresponding period, but these were only kept in the models if statistically  
49 significant.  
50  
51  
52  
53  
54

55 The study protocol was not preregistered. The full dataset used in the analysis of historical  
56 data (1910-1978) and the STATA code are available in the online Supplement  
57 **(Supplementary eTable 1 and Supplementary material)**.  
58  
59

### 60 **Statistical Analyses**

1  
2  
3 We used the historical data 1910-1978 that includes three pandemics and focused on  
4 exploring a possible asymmetric short-term effect of influenza death rates on suicide (i.e.,  
5 immediate or instantaneous effect) and long-term effect (i.e., if the relationship of exposure  
6 and outcome has a lag-structure, or in other words, if the effect of exposure on outcome is  
7 distributed over a longer period of time) by applying non-linear autoregressive distributed lag  
8 (NARDL) models,[26] a technique initially introduced for research in economics. NARDL  
9 models split the exposure in partial sum of positive changes (i.e, increases in influenza death  
10 rates) and partial sum of negative changes (i.e., decreases in influenza death rates) and explore  
11 if an outcome responds differently (i.e., asymmetrically) to an increase and decrease in  
12 exposure variable.[26] In other words, NARDL models do not rely on an assumption of  
13 symmetrical effects, by which the association of the outcome with a unit of positive change in  
14 the exposure is expected to be equal in strength and opposite in direction to the association  
15 between the outcome and a unit of negative change in the exposure. We performed the  
16 modelling by using the *nardl* command in STATA.  
17  
18  
19

20  
21 Before the NARDL model is executed, it is important to test that the conditions for the  
22 modelling are fulfilled. It starts from testing whether or not the variables are stationary (i.e.,  
23 their means and variances are constant over time). The advantage of the NARDL modelling is  
24 that it can be used regardless of whether the variables are integrated of the order zero, which  
25 means that variables are stationary, integrated of the order one, which indicates non-  
26 stationarity, or mixed.[26] We examined the stationarity properties of the variables by using  
27 the Augmented Dickey–Fuller unit-root test (ADF) and Kwiatkowski-Phillips-Schmidt-Shin  
28 test for stationarity (KPSS) to explore the order of the integration for influenza death rates and  
29 suicide rates separately for the total population, men, and women. Previous studies on  
30 suicides hypothesized that various suicidogenic factors may interplay and reinforce each other  
31 and the logarithmic transformation of suicide time series was suggested.[27,28] We made  
32 such transformation by expressing suicide rates in natural logarithm. To select the optimal  
33 number of lags (i.e., how far in the past the dependency among measurements is examined) to  
34 be used in the NARDL for dependent and independent variables, we applied the *varsoc*  
35 command in STATA using the minimal values of Akaike Information Criterion, Schwarz’s  
36 Bayesian information criterion (SBIC), and the Hannan and Quinn information criterion  
37 information criteria. If information criteria indicated different lag orders, SBIC was used to  
38 select optimal lags. We applied the NARDL model to (i) estimate the coefficients and the  
39 corresponding 95% confidence intervals for short-term and long-term association of suicide  
40 rates with an increase and decrease in influenza death rates; (ii) explore if there is a long-term  
41 cointegration between exposure and outcome by using a bounds test (if variables are  
42 cointegrated, it means their positive and negative components do not drift far away from each  
43 other in the longer term); and (iii) obtain Wald test statistics that specifies whether or not  
44 short-term and/or long-term relation between the exposure and outcome is asymmetrical.  
45 Model diagnostic tests are described in the **Supplementary material**.  
46  
47  
48  
49

50  
51 The modelling was performed, first, for the whole period of 1910-1978, and then for the  
52 periods of 1918-1956 (from the beginning of the Spanish influenza pandemic to the year  
53 before the Asian influenza pandemic), and for 1957-1978 (from the beginning of Asian  
54 pandemic to the end of observation period; with this interval also covering the Hong Kong  
55 influenza pandemic).  
56

57 All statistical analyses were performed using STATA version 15.1 (StataCorp LLC, College  
58 Station, TX, USA).  
59  
60

### Patient and public involvement

Patients and members of the public were not directly involved as this study used publically available historical national mortality data.

## RESULTS

Over the period 1910-1978, influenza death rates fluctuated considerably in Sweden with the highest rates being observed during the Spanish flu (in 1918, 1919, and 1920, the rates were 470.93, 125.55, and 48.32 per 100 000 inhabitants, respectively) (**Figure 1**). In post-pandemic years, several noticeable peaks in influenza death rates appeared, with the ones in 1922, 1927, 1929, 1931, 1937, and 1941 being particularly high. In the following years, a considerable fluctuation in influenza mortality remained, although the rates during the periods of the Asian flu (in 1957 and 1958: 8.78 and 3.99 per 100 000 inhabitants, respectively) and the Hong Kong flu (in 1968 and 1969: 3.67 and 4.68 per 100 000 inhabitants, respectively) were lower than that in the first half of the century. The influenza death rates were very similar in men and women across the entire observation period (**Figure 2**).

[Figure 1 to be inserted here]

[Figure 2 to be inserted here]

During the same period, a total of 80 058 deaths due to suicide occurred in Sweden (60 713 in men and 19 345 in women). The average suicide rate across 1910-1978 was 16.79 per 100 000 inhabitants (standard deviation [SD] of 2.58), with corresponding rates for men and women as 25.85 (SD=3.37) and 7.91 (SD=2.26) per 100 000, respectively. There was a considerable fluctuation in the suicide rates over time (**Figure 1**). The initial decrease in suicide rates during 1913-1918, with the lowest rate of 9.97 per 100 000 in 1918, was followed by an increase with the highest peak of 22.15 per 100 000 reached in 1970, with a series of intermediate peaks.

Sex-specific suicide rates differed considerably with the rates among men being between twice to over four times higher than that in women (on average, 3.4-times higher) (**Figure 2**). Moreover, suicide rates in men exhibited a sharp dip in 1913-1918, which was first followed by an increase by 1921 and then continued to raise more gradually, although with several distinct peaks and, rarely, dips. Among women, an upward trend in suicide rate was present, although with less fluctuations than that in men.

In our analysis of 1910-1978 data, the first step with the use of the ADF and KPSS test statistics on variables' stationarity indicated that the logarithmically-transformed suicide rates were integrated of the order one (for all, and men and women separately); whereas the influenza death rates were integrated of the order zero (for all and for men and women separately) (**Supplementary eTable 2**). On this premise, we implemented the NARDL modelling. Dummy variables on changes in death registration did neither appear statistically significant nor affected any parameter estimates in the initial model, and thus were not included in the final models. As reported in **Table 1**, for the observation period of 1910-1978, there were no statistically significant associations (either short-term or long-term) between decreased or increased influenza death rates and suicide rates among the overall population and among men. The corresponding results for women indicated a possible short-term association whereby a decrease in influenza rates seemed to be associated with a borderline

1  
2  
3 decrease in suicides; however, the findings were not supported by the Wald test for  
4 asymmetry ( $[\text{Wald}_{\text{SR}}]$ , i.e. the null hypothesis of  $\text{Wald}_{\text{SR}}$  that an increase and decrease in  
5 influenza death rates would symmetrically affect suicide rates was not rejected). This suggests  
6 that association was likely due to the effect of other unobserved factors that may influence  
7 suicides in women. Full specification of the models is reported in **Supplementary eTable 3**.  
8 Full specification also includes the results of testing for long-term cointegration between  
9 influenza mortality and suicides (as reported by F-statistics for Pesaran/Shin/Smith bounds  
10 test  $[\text{F}_{\text{PSS}}]$ ). Long-term cointegration was not found as we were unable to reject the null  
11 hypothesis of no cointegration between variables (**Supplementary eTable 3**, see footnotes for  
12 details on bounds test for cointegration).  
13  
14

15  
16 The results of the additional analyses for the periods 1918-1956 and 1957-1978 also failed to  
17 provide clear evidence of association between changes in influenza mortality rates and suicide  
18 rates in either short-term or long-term. However, in the analysis among women, a long-term  
19 asymmetry was suggested in both periods (the Wald test for asymmetry in the long-term  
20  $[\text{Wald}_{\text{LR}}]$   $p=0.044$  and  $p<0.001$  in the analyses of 1918-1956 and 1957-1978, respectively)  
21 and a short-term asymmetry in the analysis of 1957-1978 ( $\text{Wald}_{\text{SR}}$  test  $p=0.019$ ) (**Tables 2** and  
22 **3**). We assume that these findings may again reflect the influence of unobserved confounders,  
23 as these results were not supported by other coefficients, which correspond to long- and short-  
24 term associations between increases and decreases in influenza deaths and suicides among  
25 women in 1918-1956 and 1957-1978 (**Tables 2** and **3**). It is important to mention that the  
26 results for 1957-1978 should be considered with caution since the analysis included time  
27 series with only 22 observations. Full specifications for the models used in the analyses of  
28 1918-1956 and 1957-1978 are reported in **Supplementary eTable 4** and **5**. No evidence of  
29 long-term cointegration between influenza and suicide rates were found in either period  
30 ( $\text{F}_{\text{PSS}}$  statistics does not reject the null hypothesis in the analyses of the whole population,  
31 men, and women; **Supplementary eTable 4** and **5**, see footnotes for details on bounds test for  
32 cointegration). Overall, the model diagnostics for all models for 1910-1978, 1918-1956, and  
33 1957-1978 time series support the validity of the results since, with very few exceptions, all  
34 diagnostic tests (for details see Supplementary materials) are insignificant indicating that there  
35 is no autocorrelation, heteroscedasticity, misspecification and non-normality. In addition, the  
36 tests of the cumulative sum of recursive residuals and their squares (CUSUM and CUSUMQ,  
37 respectively) for all models indicate stability and absence of structural breaks (for details see  
38 footnotes for **Table 1-3** and **Supplementary eTable 3-5**).  
39  
40  
41  
42  
43  
44  
45  
46

## 47 **DISCUSSION**

48 This study used publicly available Swedish national data from 1910 to 1978 to shed light on  
49 the potential association between influenza-related deaths and over 80 000 deaths by suicide  
50 across the three 20<sup>th</sup> century pandemics. To our knowledge, this is the first study of influenza  
51 death and suicide that analyses data from several influenza pandemics. The full modelling  
52 provided no clear evidence of either a short-term or a long-term relationship between changes  
53 in influenza death rates and changes in suicide rates. The year with the highest number of  
54 influenza-related deaths by far, 1918, had the lowest number of suicides in the whole time  
55 series.  
56

### 57 **The findings in context**



1  
2  
3 International historical data on pandemics and suicide are very scarce. A report from the US  
4 focusing on the years 1910-1920 and using monthly data suggested a possible association  
5 between influenza deaths and suicide but because the data did not go beyond the last year of  
6 that pandemic, it does not inform us about any longer term effects.[17] Strengths of that study  
7 included the use of monthly data and the use of time series analysis, rather than just  
8 comparing suicide rates before and after the pandemic. Chang et al studied suicides during the  
9 same pandemic in Taiwan, not using a time series analysis but also using monthly data from  
10 1918-20 and found an increase during the few months of the second wave of the pandemic but  
11 that the effect was short-lived. As our study used yearly and not monthly data, it could not  
12 confirm or disconfirm the findings of the Taiwanese study. Our study expands and improves  
13 upon previous investigations because it allowed us to examine the long-term associations  
14 between influenza and suicide deaths. A study focusing on SARS and suicide found some  
15 evidence of sex-specific effects in the short-term.[21] As suicide rates varied considerably in  
16 the years preceding SARS in Hong Kong, it is difficult to be certain that SARS, and not other  
17 contributing factors, was causally associated with an increase in suicides. In the present study,  
18 which uniquely spanned over several decades, we found that while suicide was consistently  
19 more prevalent among men throughout the study period, there were no sex-specific  
20 associations to influenza death.  
21  
22  
23  
24  
25

### 26 **Meaning of the study**

27 What do these results mean for our understanding of the short- and long-term consequences of  
28 influenza pandemics? Our results do not support the belief that global pandemics necessarily  
29 lead to a substantial increase in suicides. There are many factors associated with a global  
30 pandemic that may potentially increase suicide risk in the population, but these may be offset  
31 by other protective factors that should not be overlooked. A shared sense of belonging and  
32 focus, social connectedness and a “pulling together effect” may be one such factor.[1,29] We  
33 acknowledge that these historical findings may not be directly applicable to the current  
34 COVID-19 pandemic because there are several important differences between the previous  
35 and current pandemics, such as globalisation, a different socio-political context and the  
36 impact of social media, to name a few.  
37  
38  
39

### 40 **Strengths and limitations**

41 The major strengths of this study were the use of a large amount of historical national data  
42 across three 20<sup>th</sup> century pandemics and state of the art time-series analyses. A limitation is  
43 that all data comes from a single country and thus caution is needed when generalizing  
44 the study findings to countries with different level of development of clinical and preventive  
45 medicine, social support, etc. The study used the Swedish historical public death records and  
46 we had no means of verifying the causes of death. The coverage and precision of these  
47 records is likely to have improved over time for both variables. To guard against effects of  
48 changes in the recording of causes of death, we created a series of dummy variables for each  
49 corresponding period but no significant effects of those were found. If there were some other  
50 time-varying factors that could affect the coverage and precision of death records, apart from  
51 the official changes in registration system, this might have biased our results, in particular if  
52 such factors differentially affected the quality of recording deaths due to influenza and  
53 suicide. As we did not have access to data with higher temporal resolution than yearly data,  
54 that could affect our results if the time sequence of association between changes in influenza  
55 death and suicide differ from the chosen time interval. A multitude of factors may vary that  
56 impact the resilience of the society with regards to the effect of a pandemic. Such factors may  
57 also vary over time and place. However, the fact that we observed no clear associations  
58 between influenza and suicide deaths across pandemics, which challenged society with  
59  
60

1  
2  
3 various degrees of e.g. economic effects and health care supply issues, does support the  
4 stability of our findings.  
5

## 6 **Conclusion**

7 In this national analysis of historical data spanning across three 20<sup>th</sup> century pandemics, we  
8 found no evidence of a short- or long-term association between influenza death rates and  
9 suicide rates. The results challenge the notion that an increase of suicides follows as a certain  
10 consequence of a pandemic. Future research on the effect of the current COVID-19 pandemic  
11 should explore the possibility of differential short- and long-term effects on suicide rates in  
12 different subgroups of the population.  
13  
14  
15  
16  
17

## 18 **Footnotes**

19  
20 Contributor statement: CR and AS have full access to all the data in this study and take full  
21 responsibility as guarantors for the integrity of the data and the accuracy of the data analysis.  
22 CR, DMC, and AS conceived and designed the study. CR, KM, MA, and AS performed data  
23 collection. AS undertook the statistical analysis. CR, DMC, and AS drafted the manuscript.  
24 CR, AS, DMC, KM, MA, BR and OF provided critical input to the analyses, interpreted the  
25 data, and revised the manuscript critically. The corresponding author confirms that all listed  
26 authors meet authorship criteria and that no others meeting the criteria have been omitted.  
27  
28

29 Funding: Karolinska Institutet and Region Stockholm, which provide salary for the authors,  
30 had no involvement in the study design; collection, analysis, and interpretation of data; in the  
31 writing of the report; or in the decision to submit the paper for publication.  
32  
33

34 Competing interests: All authors have completed the ICMJE uniform disclosure form  
35 at [www.icmje.org/coi\\_disclosure.pdf](http://www.icmje.org/coi_disclosure.pdf) and declare: no grant support from any organisation for  
36 the submitted work, salaries of the author were provided from Region Stockholm and  
37 Karolinska Institutet but not specifically for this project; no financial relationships with any  
38 organisations that might have an interest in the submitted work in the previous three years; no  
39 other relationships or activities that could appear to have influenced the submitted work.  
40  
41  
42

43 Data sharing: The full dataset (numbers of deaths by influenza and suicide and total  
44 population for 1910-1978) is published as supplementary material (eTable 1).  
45  
46

47 Dissemination to participants and patient organizations: since only aggregated mortality data  
48 was used, dissemination to participants is not possible. We intend to disseminate the results to  
49 the general public via media and the research groups webpage.  
50  
51

52 Transparency declaration: The lead author affirms that this manuscript is an honest, accurate,  
53 and transparent account of the study being reported; that no important aspects of the study  
54 have been omitted; and that any discrepancies from the study as planned have been explained.  
55  
56

57 Ethical approval: Since only data already available in the public domain were used, ethical  
58 approval was not necessary.  
59  
60



## References

- 1 Reger MA, Stanley IH, Joiner TE. Suicide Mortality and Coronavirus Disease 2019—A Perfect Storm? *JAMA Psychiatry* Published Online First: 10 April 2020. doi:10.1001/jamapsychiatry.2020.1060
- 2 Dutheil F, Mondillon L, Navel V. PTSD as the second tsunami of the SARS-Cov-2 pandemic. *Psychol Med* 2020;:1–2. doi:10.1017/S0033291720001336
- 3 O'Connor RC, Wetherall K, Cleare S, *et al.* Mental health and well-being during the COVID-19 pandemic: longitudinal analyses of adults in the UK COVID-19 Mental Health & Wellbeing study. *Br J Psychiatry* 2020;:1–8. doi:10.1192/bjp.2020.212
- 4 Pierce M, Hope H, Ford T, *et al.* Mental health before and during the COVID-19 pandemic: a longitudinal probability sample survey of the UK population. *Lancet Psychiatry* 2020;7:883–92. doi:10.1016/S2215-0366(20)30308-4
- 5 WHO. Substantial investment needed to avert mental health crisis. <https://www.who.int/news-room/detail/14-05-2020-substantial-investment-needed-to-avert-mental-health-crisis> (accessed 1 Jun 2020).
- 6 Zalsman G, Stanley B, Szanto K, *et al.* Suicide in the Time of COVID-19: Review and Recommendations. *Arch Suicide Res* 2020;:1–6. doi:10.1080/13811118.2020.1830242
- 7 Psychiatrists see alarming rise in patients needing urgent and emergency care and forecast a 'tsunami' of mental illness. [www.rcpsych.ac.uk](http://www.rcpsych.ac.uk). <https://www.rcpsych.ac.uk/news-and-features/latest-news/detail/2020/05/15/psychiatrists-see-alarming-rise-in-patients-needing-urgent-and-emergency-care> (accessed 1 Jun 2020).
- 8 Moutier C. Suicide Prevention in the COVID-19 Era: Transforming Threat Into Opportunity. *JAMA Psychiatry* Published Online First: 16 October 2020. doi:10.1001/jamapsychiatry.2020.3746
- 9 Stuckler D, Basu S, Suhrcke M, *et al.* The public health effect of economic crises and alternative policy responses in Europe: an empirical analysis. *The Lancet* 2009;374:315–23. doi:10.1016/S0140-6736(09)61124-7
- 10 Phillips JA, Nugent CN. Suicide and the Great Recession of 2007–2009: The role of economic factors in the 50 U.S. states. *Soc Sci Med* 2014;116:22–31. doi:10.1016/j.socscimed.2014.06.015
- 11 Harper S, Bruckner TA. Did the Great Recession increase suicides in the USA? Evidence from an interrupted time-series analysis. *Ann Epidemiol* 2017;27:409-414.e6. doi:10.1016/j.annepidem.2017.05.017
- 12 Reeves A, McKee M, Stuckler D. Economic suicides in the Great Recession in Europe and North America. *Br J Psychiatry* 2014;205:246–7. doi:10.1192/bjp.bp.114.144766
- 13 Ahmad FB, Anderson RN. The Leading Causes of Death in the US for 2020. *JAMA* Published Online First: 31 March 2021. doi:10.1001/jama.2021.5469
- 14 Appleby L, Richards N, Ibrahim S, *et al.* Suicide in England in the COVID-19 pandemic: Early observational data from real time surveillance. *Lancet Reg Health - Eur* 2021;:100110. doi:10.1016/j.lanepe.2021.100110
- 15 Pirkis J, John A, Shin S, *et al.* Suicide trends in the early months of the COVID-19 pandemic: an interrupted time-series analysis of preliminary data from 21 countries. *Lancet Psychiatry* Published Online First: 13 April 2021. doi:10.1016/S2215-0366(21)00091-2

- 1  
2  
3 16 Mitchell TO, Li L. State-Level Data on Suicide Mortality During COVID-19  
4 Quarantine: Early Evidence of a Disproportionate Impact on Racial Minorities. *Psychiatry*  
5 *Res* 2021;**295**:113629. doi:10.1016/j.psychres.2020.113629  
6  
7 17 Wasserman IM. The impact of epidemic, war, prohibition and media on suicide:  
8 United States, 1910-1920. *Suicide Life Threat Behav* 1992;**22**:240–54.  
9  
10 18 Chang Y-H, Chang S-S, Hsu C-Y, *et al.* Impact of Pandemic on Suicide: Excess  
11 Suicides in Taiwan During the 1918–1920 Influenza Pandemic. *J Clin Psychiatry* 2020;**81**.  
12 doi:10.4088/JCP.20113454  
13  
14 19 Stack S, Rockett IRH. Social distancing predicts suicide rates: Analysis of the 1918 flu  
15 pandemic in 43 large cities, research note. *Suicide Life Threat Behav* 2021;:sltb.12729.  
16 doi:10.1111/sltb.12729  
17  
18 20 Holmberg M. The ghost of pandemics past: revisiting two centuries of influenza in  
19 Sweden. *Med Humanit* 2017;**43**:141–7. doi:10.1136/medhum-2016-011023  
20  
21 21 Chan SMS, Chiu FKH, Lam CWL, *et al.* Elderly suicide and the 2003 SARS epidemic  
22 in Hong Kong. *Int J Geriatr Psychiatry* 2006;**21**:113–8. doi:10.1002/gps.1432  
23  
24 22 Cheung YT, Chau PH, Yip PSF. A revisit on older adults suicides and Severe Acute  
25 Respiratory Syndrome (SARS) epidemic in Hong Kong. *Int J Geriatr Psychiatry*  
26 2008;**23**:1231–8. doi:10.1002/gps.2056  
27  
28 23 Yip PSF, Cheung YT, Chau PH, *et al.* The Impact of Epidemic Outbreak: The Case of  
29 Severe Acute Respiratory Syndrome (SARS) and Suicide Among Older Adults in Hong  
30 Kong. *Crisis* 2010;**31**:86–92. doi:10.1027/0227-5910/a000015  
31  
32 24 *Statistics Sweden. Statistical yearbook of Sweden [Statistisk årsbok för Sverige 1914–*  
33 *2014]. <https://www.scb.se/hitta-statistik/aldre-statistik/innehall/statistisk-arsbok-1914-2014/>.*  
34  
35 25 The National Board of Health and Welfare. Cause of death statistics. History,  
36 production methods and reliability [Dödsorsaksstatistik. Historik, produktionsmetoder och  
37 tillförlitlighet]. [www.socialstyrelsen.se](http://www.socialstyrelsen.se). 2010.  
38  
39 26 Shin Y, Yu B, Greenwood-Nimmo M. Modelling Asymmetric Cointegration and  
40 Dynamic Multipliers in a Nonlinear ARDL Framework. In: Sickles RC, Horrace WC, eds.  
41 *Festschrift in Honor of Peter Schmidt: Econometric Methods and Applications*. New York: :  
42 Springer Science+Business Media 2014. 281–314.  
43  
44 27 Norstrom T, Stickley A, Shibuya K. The importance of alcoholic beverage type for  
45 suicide in Japan: a time-series analysis, 1963-2007. *Drug Alcohol Rev* 2012;**31**:251–6.  
46 doi:10.1111/j.1465-3362.2011.00300.x  
47  
48 28 Gunnell D, Lopatzidis A, Dorling D, *et al.* Suicide and unemployment in young  
49 people. Analysis of trends in England and Wales, 1921-1995. *Br J Psychiatry* 1999;**175**:263–  
50 70. doi:10.1192/bjp.175.3.263  
51  
52 29 Zortea TC, Brenna CTA, Joyce M, *et al.* The Impact of Infectious Disease-Related  
53 Public Health Emergencies on Suicide, Suicidal Behavior, and Suicidal Thoughts: A  
54 Systematic Review. *Crisis* 2020;:1–14. doi:10.1027/0227-5910/a000753  
55  
56  
57  
58  
59  
60

## Figure legends

**Figure 1. Annual suicide rate (scaled on the left arithmetic Y-axis) and influenza mortality (scaled on the right logarithmic Y-axis) in Sweden in 1910-1978 per 100 000 inhabitants.** *Note:* To ease visualization, influenza death rates are reported on the logarithmic scale, while for the analysis, the logarithmic transformation was performed for suicide rates. Grey areas denote the time periods corresponding to the Spanish influenza pandemic ('S.flu', 1918-1920), the Asian influenza pandemic ('A.flu', 1957-1958), and the Hong Kong influenza pandemic ('HK.flu', 1968-1969) in Sweden.

**Figure 2. Sex-specific annual suicide rate (scaled on the left arithmetic Y-axis) and influenza mortality (scaled on the right logarithmic Y-axis) in Sweden in 1910-1978 per 100 000 inhabitants of corresponding sex.** *Note:* To ease visualization, influenza death rates are reported on the logarithmic scale, while for the analysis, the logarithmic transformation was performed for suicide rates. Grey areas denote the time periods corresponding to the Spanish influenza pandemic ('S.flu', 1918-1920), the Asian influenza pandemic ('A.flu', 1957-1958), and the Hong Kong influenza pandemic ('HK.flu', 1968-1969) in Sweden.

**Table 1. Short-term and long-term relationship of suicide rates with positive and negative changes in influenza death rates among the whole population, men, and women in 1910-1978 in Sweden**

|                                      | Whole population                 |         | Men                               |         | Women                             |         |
|--------------------------------------|----------------------------------|---------|-----------------------------------|---------|-----------------------------------|---------|
|                                      | Coeff. (95% CI)                  | p-value | Coeff. (95% CI)                   | p-value | Coeff. (95% CI)                   | p-value |
| <b>Short-term coefficients</b>       |                                  |         |                                   |         |                                   |         |
| Influenza +                          | 0.00002<br>(-0.00036 to 0.00039) | 0.931   | 0.00004<br>(-0.00034 to 0.00041)  | 0.854   | -0.00007<br>(-0.00056 to 0.00041) | 0.760   |
| Influenza –                          | 0.00103<br>(-0.00579 to 0.00785) | 0.764   | -0.00192<br>(-0.01005 to 0.00621) | 0.638   | 0.00780<br>(0.00015 to 0.01544)   | 0.046   |
| <b>Long-term coefficients</b>        |                                  |         |                                   |         |                                   |         |
| Influenza +                          | -0.00012                         | 0.998   | -0.01314                          | 0.745   | 0.11254                           | 0.538   |
| Influenza –                          | 0.00211                          | 0.962   | 0.01443                           | 0.722   | -0.10789                          | 0.544   |
| <b>Model diagnostics</b>             |                                  |         |                                   |         |                                   |         |
| Q-test for autocorrelation, $\chi^2$ | 40.160                           | 0.125   | 35.260                            | 0.273   | 31.850                            | 0.424   |
| Heteroscedasticity, $\chi^2$         | 3.649                            | 0.056   | 5.439                             | 0.020   | 1.280                             | 0.258   |
| Normality, $\chi^2$                  | 2.826                            | 0.243   | 2.237                             | 0.327   | 2.372                             | 0.305   |
| RESET, F-statistics                  | 4.656                            | 0.006   | 5.473                             | 0.023   | 1.013                             | 0.394   |
| CUSUM                                | Stabl., no str. break            | NA      | Stabl., no str. break             | NA      | Stabl., no str. break             | NA      |
| CUSUMQ                               | Stabl.                           | NA      | Stabl.                            | NA      | Stabl.                            | NA      |
| Adj. R <sup>2</sup>                  | 0.257                            | NA      | 0.300                             | NA      | 0.374                             | NA      |
| Wald <sub>SR</sub> , F-statistics    | 0.054                            | 0.817   | 0.275                             | 0.602   | 1.062                             | 0.307   |
| Wald <sub>LR</sub> , F-statistics    | 1.206                            | 0.277   | 1.176                             | 0.283   | 0.771                             | 0.384   |

*Note:* Signs as “+” and “–” denote the exposure variable being partitioned in positive and negative changes, respectively. Wald test for asymmetry in the short-term (Wald<sub>SR</sub>) and long-term (Wald<sub>LR</sub>) has a null hypothesis of no cointegration. Q-test for autocorrelation reports the results of Portmanteau test for white noise. Heteroscedasticity is measured by Breusch-Pagan/Cook-Weisberg test. Normality is measured by Jarque-Bera test. RESET statistics refers to the regression specification error tests. CUSUM and CUSUMQ refer to the tests of the cumulative sum of recursive residuals and their squares, respectively. “NA” denotes that a certain test parameter was not applicable. Model diagnostics support the validity of the results since, with very few exceptions (RESET statistics for the whole population and men, and heteroscedasticity for men), all diagnostic tests are insignificant indicating that there is no autocorrelation, heteroscedasticity, misspecification and non-normality In

1  
2  
3 addition, all CUSUM and CUSUMQ tests all models indicate stability and absence of structural breaks (“Stabl., no str. break” in the results of  
4 CUSUM indicates that the model was found stable and the null hypothesis of no structural break was not rejected [same applies to “Stabl.” as an  
5 output for CUSUMQ]).  
6  
7  
8  
9  
10  
11  
12  
13  
14  
15  
16  
17  
18  
19  
20  
21  
22  
23  
24  
25  
26  
27  
28  
29  
30  
31  
32  
33  
34  
35  
36  
37  
38  
39  
40  
41  
42  
43  
44  
45  
46

For peer review only

**Table 2. Short-term and long-term relationship of suicide rates with positive and negative changes in influenza death rates among the whole population, men, and women in 1918-1956 in Sweden**

|                                      | Whole population                 |         | Men                               |         | Women                            |         |
|--------------------------------------|----------------------------------|---------|-----------------------------------|---------|----------------------------------|---------|
|                                      | Coeff. (95% CI)                  | p-value | Coeff. (95% CI)                   | p-value | Coeff. (95% CI)                  | p-value |
| <b>Short-term coefficients</b>       |                                  |         |                                   |         |                                  |         |
| Influenza +                          | 0.00002<br>(-0.00077 to 0.00082) | 0.955   | -0.00014<br>(-0.00102 to 0.00075) | 0.755   | 0.00098<br>(-0.00068 to 0.00263) | 0.237   |
| Influenza –                          | 0.00087<br>(-0.00643 to 0.00817) | 0.809   | -0.00132<br>(-0.01001 to 0.00741) | 0.760   | 0.00434<br>(-0.00595 to 0.01463) | 0.394   |
| <b>Long-term coefficients</b>        |                                  |         |                                   |         |                                  |         |
| Influenza +                          | 0.00011                          | 0.994   | -0.00490                          | 0.802   | 0.01403                          | 0.521   |
| Influenza –                          | 0.00103                          | 0.936   | 0.00548                           | 0.775   | -0.01098                         | 0.600   |
| <b>Model diagnostics</b>             |                                  |         |                                   |         |                                  |         |
| Q-test for autocorrelation, $\chi^2$ | 14.130                           | 0.658   | 9.674                             | 0.917   | 9.614                            | 0.919   |
| Heteroscedasticity, $\chi^2$         | 0.939                            | 0.333   | 0.768                             | 0.381   | 5.042                            | 0.025   |
| Normality, $\chi^2$                  | 0.420                            | 0.811   | 0.132                             | 0.936   | 2.383                            | 0.304   |
| RESET, F-statistics                  | 0.413                            | 0.745   | 0.764                             | 0.524   | 0.505                            | 0.683   |
| CUSUM                                | Stabl., no str. break            | NA      | Stabl., no str. break             | NA      | Stabl., no str. break            | NA      |
| CUSUMQ                               | Stabl.                           | NA      | Stabl.                            | NA      | Stabl.                           | NA      |
| Adj. R <sup>2</sup>                  | 0.309                            | NA      | 0.345                             | NA      | 0.432                            | NA      |
| Wald <sub>SR</sub> , F-statistics    | 0.056                            | 0.815   | 0.155                             | 0.697   | 0.183                            | 0.673   |
| Wald <sub>LR</sub> , F-statistics    | 1.555                            | 0.222   | 0.217                             | 0.645   | 4.479                            | 0.044   |

*Note:* Signs as “+” and “–” denote the exposure variable being partitioned in positive and negative changes, respectively. Wald test for asymmetry in the short-term (Wald<sub>SR</sub>) and long-term (Wald<sub>LR</sub>) has a null hypothesis of no cointegration. Q-test for autocorrelation reports the results of Portmanteau test for white noise. Heteroscedasticity is measured by Breusch-Pagan/Cook-Weisberg test. Normality is measured by Jarque-Bera test. RESET statistics refers to the regression specification error tests. CUSUM and CUSUMQ refer to the tests of the cumulative sum of recursive residuals and their squares, respectively. “NA” denotes that a certain test parameter was not applicable. Model diagnostics support the validity of the results since, with one exception (heteroscedasticity for women), all diagnostic tests are insignificant indicating that there is no autocorrelation, heteroscedasticity, misspecification and non-normality. In addition, all CUSUM and CUSUMQ tests all models indicate

1  
2  
3  
4  
5  
6  
7  
8  
9  
10  
11  
12  
13  
14  
15  
16  
17  
18  
19  
20  
21  
22  
23  
24  
25  
26  
27  
28  
29  
30  
31  
32  
33  
34  
35  
36  
37  
38  
39  
40  
41  
42  
43  
44  
45  
46

stability and absence of structural breaks (“Stabl., no str. break” in the results of CUSUM indicates that the model was found stable and the null hypothesis of no structural break was not rejected [same applies to “Stabl.” as an output for CUSUMQ]).

For peer review only



**Table 3. Short-term and long-term relationship of suicide rates with positive and negative changes in influenza death rates among the whole population, men, and women in 1957-1978 in Sweden**

|                                      | Whole population                  |         | Men                               |         | Women                             |         |
|--------------------------------------|-----------------------------------|---------|-----------------------------------|---------|-----------------------------------|---------|
|                                      | Coeff. (95% CI)                   | p-value | Coeff. (95% CI)                   | p-value | Coeff. (95% CI)                   | p-value |
| <b>Short-term coefficients</b>       |                                   |         |                                   |         |                                   |         |
| Influenza +                          | -0.00964<br>(-0.02252 to 0.00324) | 0.883   | -0.00876<br>(-0.02738 to 0.00985) | 0.328   | -0.00976<br>(-0.02033 to 0.00081) | 0.068   |
| Influenza –                          | 0.00194<br>(-0.02614 to 0.03003)  | 0.130   | -0.01531<br>(-0.04658 to 0.01596) | 0.309   | 0.02155<br>(-0.00343 to 0.04653)  | 0.085   |
| <b>Long-term coefficients</b>        |                                   |         |                                   |         |                                   |         |
| Influenza +                          | 0.01255                           | 0.618   | -0.02659                          | 0.541   | 0.04091                           | 0.064   |
| Influenza –                          | -0.01033                          | 0.684   | 0.024538                          | 0.582   | -0.02870                          | 0.184   |
| <b>Model diagnostics</b>             |                                   |         |                                   |         |                                   |         |
| Q-test for autocorrelation, $\chi^2$ | 5.662                             | 0.773   | 3.790                             | 0.925   | 5.243                             | 0.813   |
| Heteroscedasticity, $\chi^2$         | 0.102                             | 0.750   | 0.155                             | 0.694   | 0.079                             | 0.778   |
| Normality, $\chi^2$                  | 1.569                             | 0.456   | 1.627                             | 0.443   | 1.237                             | 0.537   |
| RESET, F-statistics                  | 5.839                             | 0.014   | 3.348                             | 0.064   | 1.089                             | 0.398   |
| CUSUM                                | Stabl., no str. break             | NA      | Stabl., no str. break             | NA      | Stabl., no str. break             | NA      |
| CUSUMQ                               | Stabl.                            | NA      | Stabl.                            | NA      | Stabl.                            | NA      |
| Adj. R <sup>2</sup>                  | 0.246                             | NA      | 0.337                             | NA      | 0.371                             | NA      |
| Wald <sub>SR</sub> , F-statistics    | 2.903                             | 0.112   | 0.536                             | 0.477   | 7.132                             | 0.019   |
| Wald <sub>LR</sub> , F-statistics    | 0.922                             | 0.354   | 0.297                             | 0.595   | 26.74                             | <0.001  |

*Note:* Signs as “+” and “–” denote the exposure variable being partitioned in positive and negative changes, respectively. Wald test for asymmetry in the short-term (Wald<sub>SR</sub>) and long-term (Wald<sub>LR</sub>) has a null hypothesis of no cointegration. Q-test for autocorrelation reports the results of Portmanteau test for white noise. Heteroscedasticity is measured by Breusch-Pagan/Cook-Weisberg test. Normality is measured by Jarque-Bera test. RESET statistics refers to the regression specification error tests. CUSUM and CUSUMQ refer to the tests of the cumulative sum of recursive residuals and their squares, respectively. “NA” denotes that a certain test parameter was not applicable. Model diagnostics support the validity of the results since, with one exception (RESET statistics for the whole population), all diagnostic tests are insignificant indicating that there is no autocorrelation, heteroscedasticity, misspecification and non-normality. In addition, all CUSUM and CUSUMQ tests all

1  
2  
3  
4  
5  
6  
7  
8  
9  
10  
11  
12  
13  
14  
15  
16  
17  
18  
19  
20  
21  
22  
23  
24  
25  
26  
27  
28  
29  
30  
31  
32  
33  
34  
35  
36  
37  
38  
39  
40  
41  
42  
43  
44  
45  
46

models indicate stability and absence of structural breaks (“Stabl., no str. break” in the results of CUSUM indicates that the model was found stable and the null hypothesis of no structural break was not rejected [same applies to “Stabl.” as an output for CUSUMQ]).

For peer review only

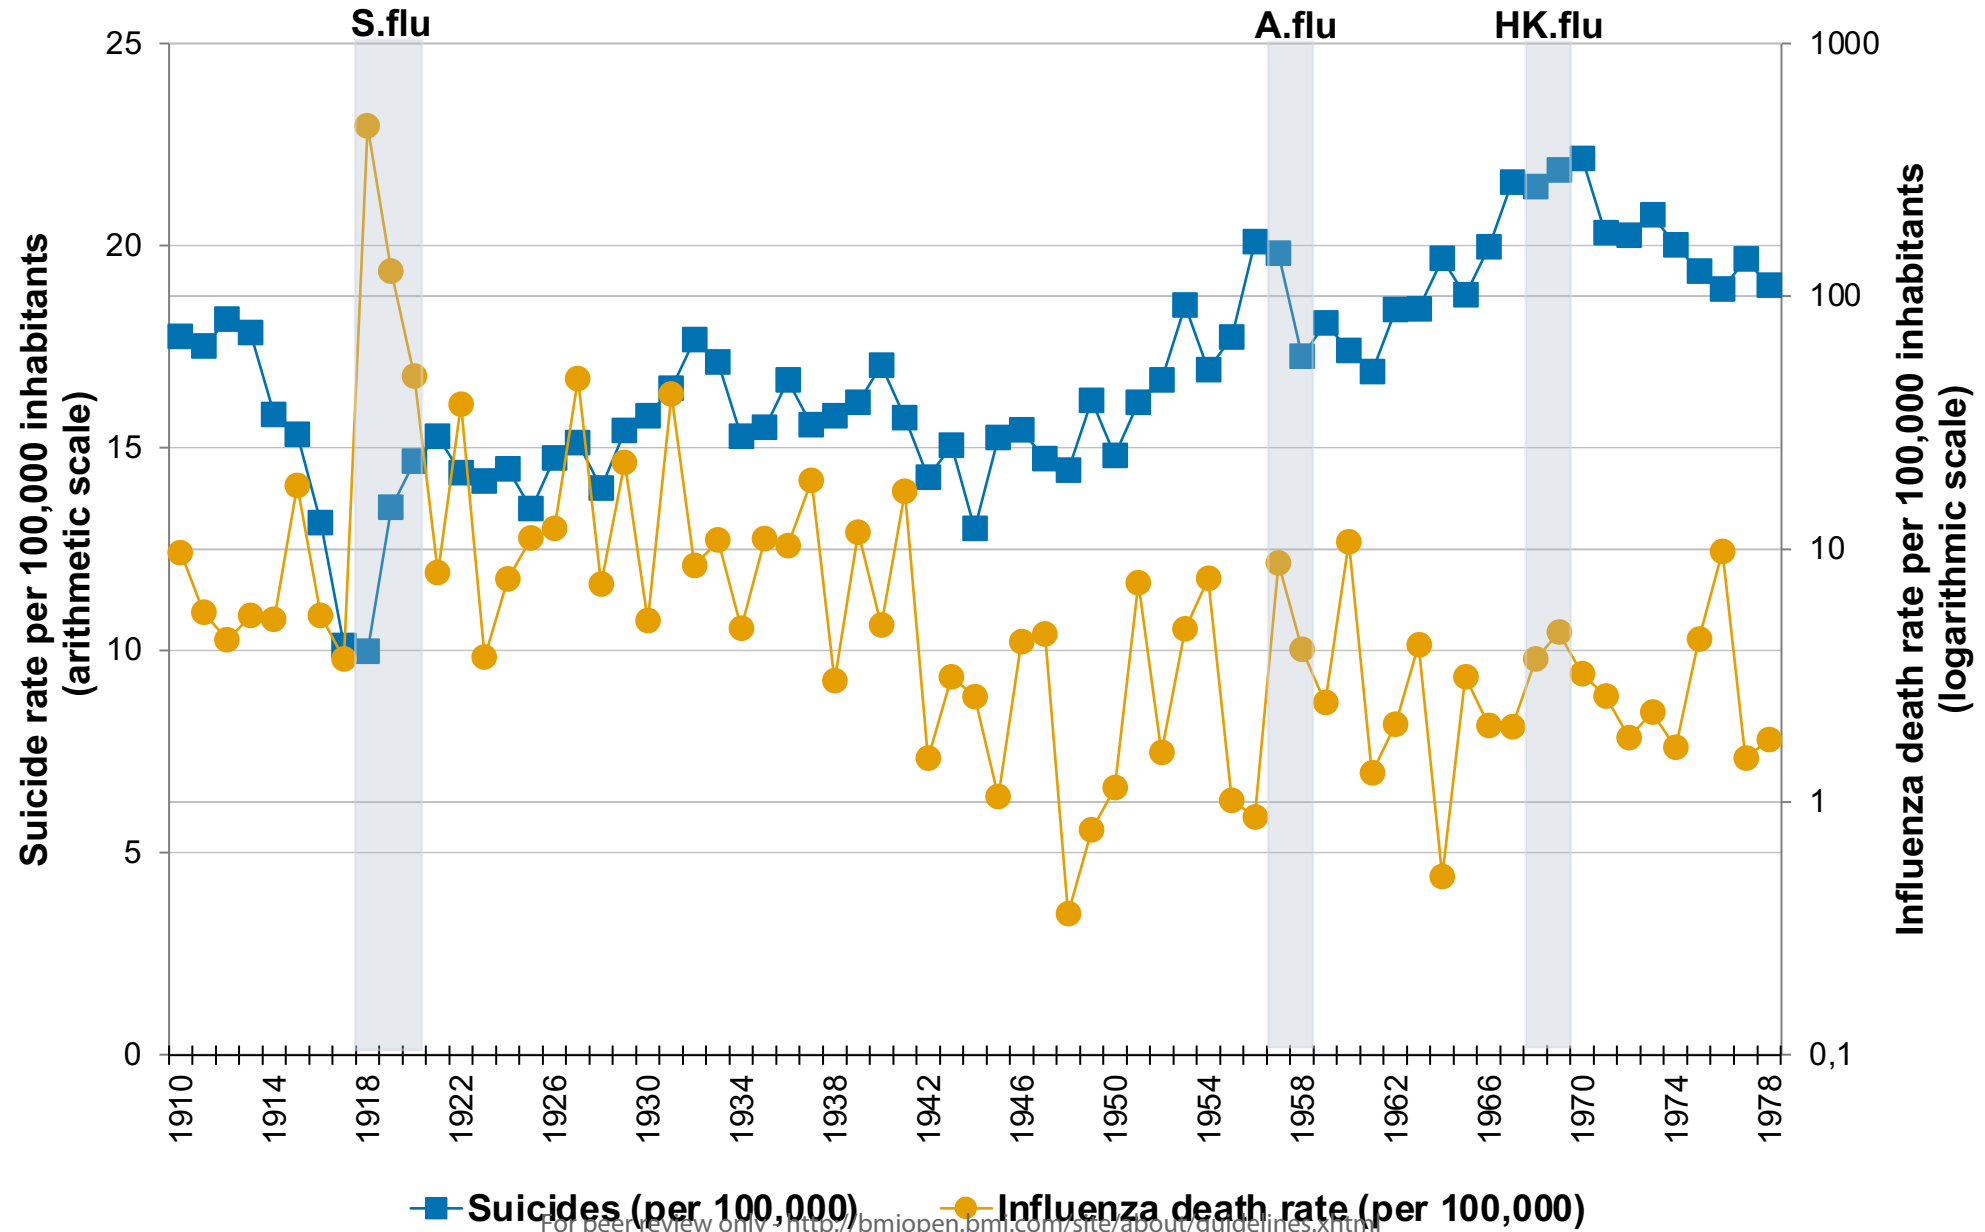

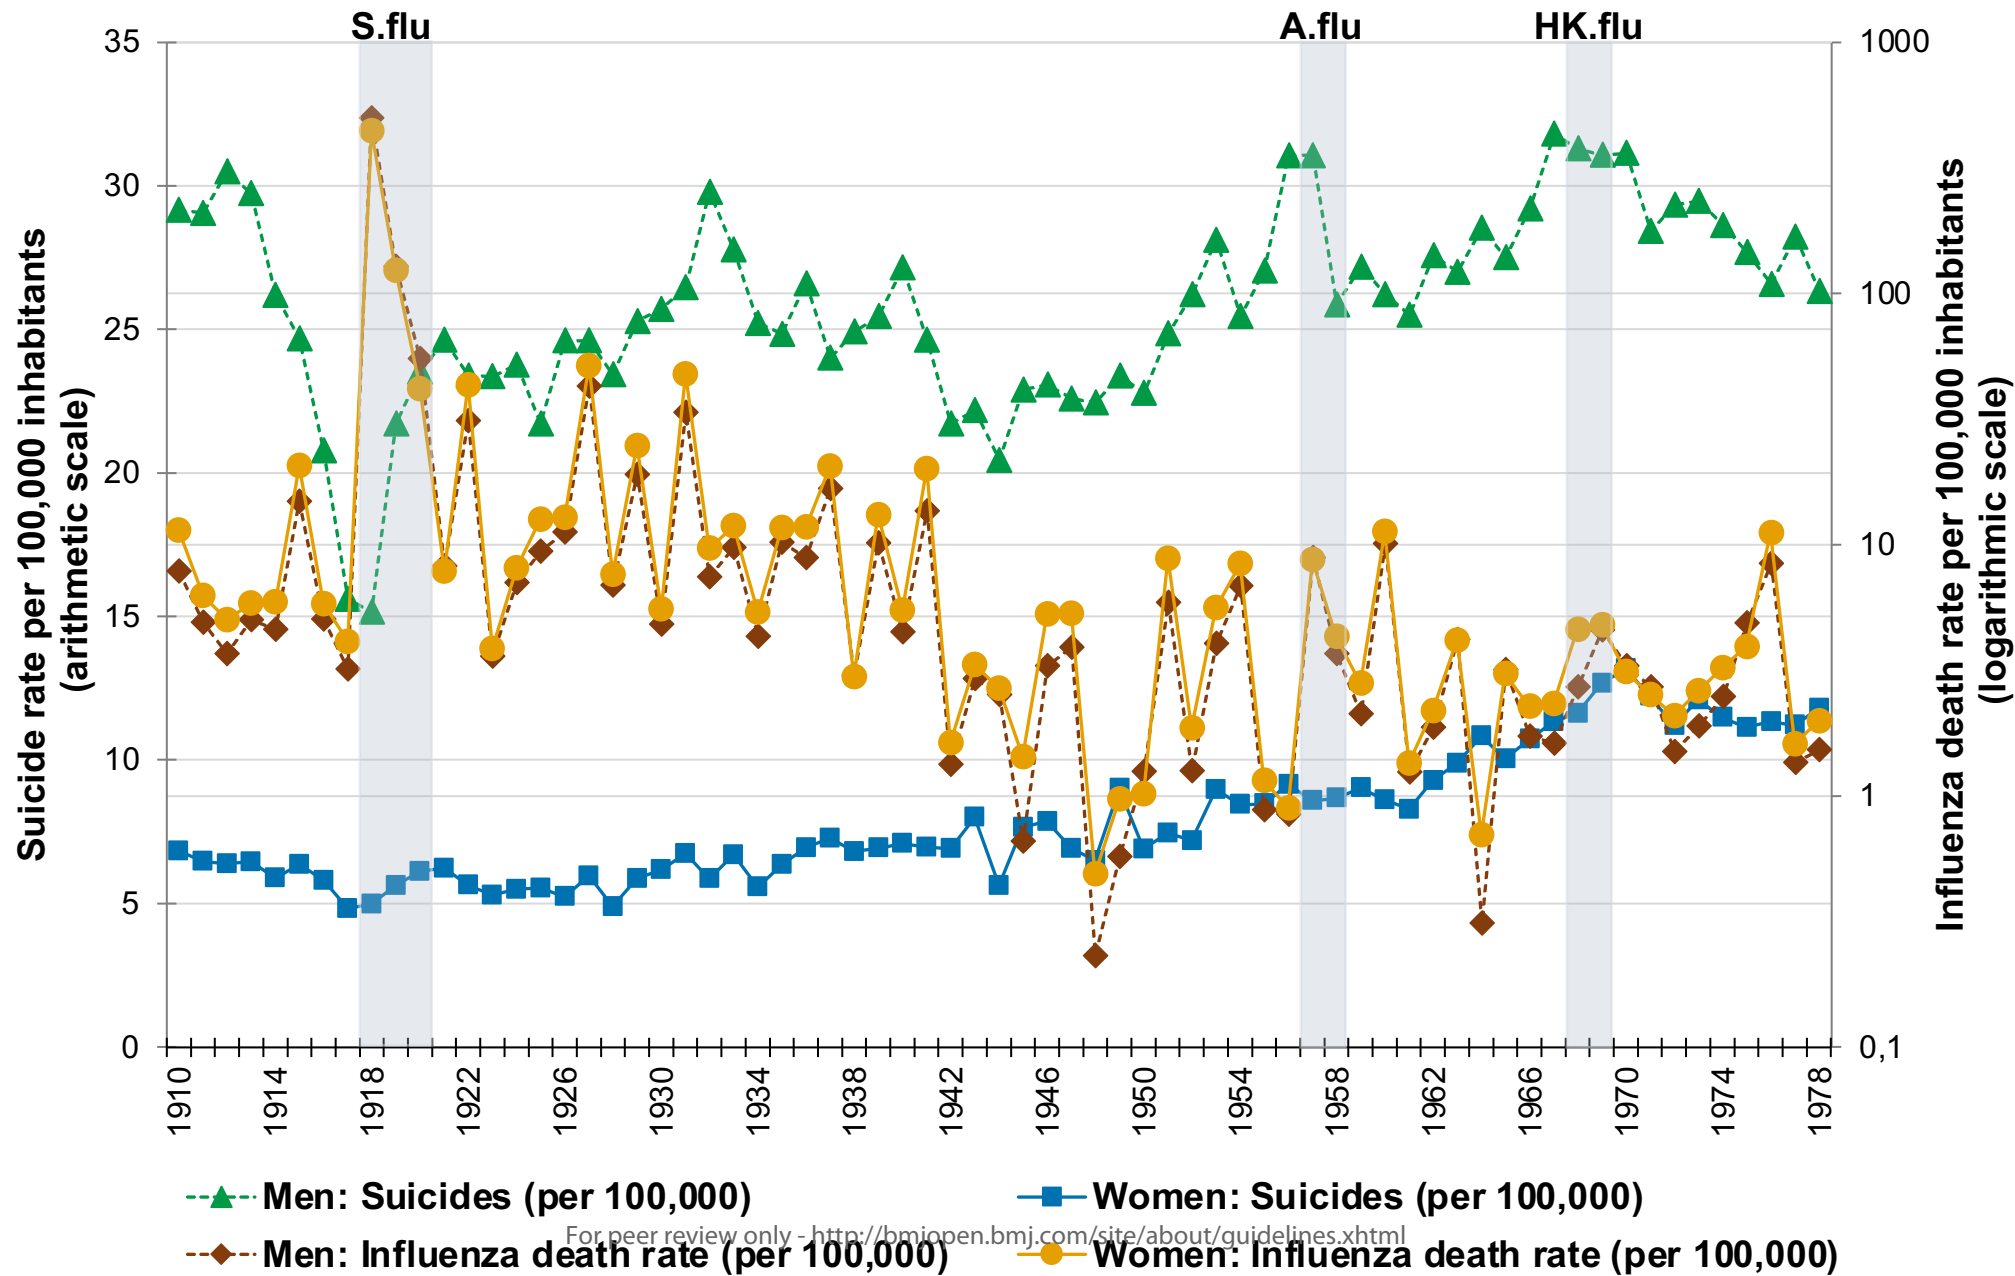

1  
2  
3  
4  
5  
6  
7  
8  
9  
10  
11  
12  
13  
14  
15  
16  
17  
18  
19  
20  
21  
22  
23  
24  
25  
26  
27  
28  
29  
30  
31  
32  
33  
34  
35  
36  
37  
38  
39  
40  
41

## Supplementary material

**eTable 1. Original data on the number of deaths by influenza and suicide, and population size for total population, men, and women in 1910-1978, retrieved from the Statistical Yearbook of Sweden from 1910-1978**

| Year | Total population, N | Men, N  | Women, N | Deaths by influenza in total population, N | Deaths by influenza among men, N | Deaths by influenza among women, N | Deaths by suicide in total population, N | Deaths by suicide among men, N | Deaths by suicide among women, N |
|------|---------------------|---------|----------|--------------------------------------------|----------------------------------|------------------------------------|------------------------------------------|--------------------------------|----------------------------------|
| 1910 | 5522403             | 2698729 | 2823674  | 534                                        | 212                              | 322                                | 980                                      | 787                            | 193                              |
| 1911 | 5561799             | 2718638 | 2843161  | 312                                        | 134                              | 178                                | 974                                      | 790                            | 184                              |
| 1912 | 5604192             | 2740737 | 2863455  | 245                                        | 101                              | 144                                | 1019                                     | 836                            | 183                              |
| 1913 | 5638583             | 2756946 | 2881637  | 307                                        | 139                              | 168                                | 1006                                     | 820                            | 186                              |
| 1914 | 5679607             | 2777447 | 2902160  | 300                                        | 128                              | 172                                | 899                                      | 728                            | 171                              |
| 1915 | 5712740             | 2794552 | 2918188  | 1018                                       | 417                              | 601                                | 876                                      | 690                            | 186                              |
| 1916 | 5757566             | 2817950 | 2939616  | 314                                        | 143                              | 171                                | 757                                      | 586                            | 171                              |
| 1917 | 5800847             | 2841554 | 2959293  | 213                                        | 91                               | 122                                | 587                                      | 444                            | 143                              |
| 1918 | 5813850             | 2849205 | 2964645  | 27379                                      | 14245                            | 13134                              | 580                                      | 432                            | 148                              |
| 1919 | 5847037             | 2868395 | 2978642  | 7341                                       | 3667                             | 3674                               | 791                                      | 623                            | 168                              |
| 1920 | 5904489             | 2898256 | 3006233  | 2853                                       | 1596                             | 1257                               | 866                                      | 682                            | 184                              |
| 1921 | 5954316             | 2925988 | 3028328  | 479                                        | 241                              | 238                                | 910                                      | 721                            | 189                              |
| 1922 | 5987520             | 2944031 | 3043489  | 2235                                       | 918                              | 1317                               | 861                                      | 689                            | 172                              |
| 1923 | 6005759             | 2948508 | 3057251  | 224                                        | 106                              | 118                                | 851                                      | 689                            | 162                              |
| 1924 | 6036118             | 2964230 | 3071888  | 458                                        | 210                              | 248                                | 874                                      | 705                            | 169                              |
| 1925 | 6053562             | 2972554 | 3081008  | 669                                        | 280                              | 389                                | 817                                      | 646                            | 171                              |
| 1926 | 6074368             | 2982625 | 3091743  | 731                                        | 335                              | 396                                | 896                                      | 734                            | 162                              |
| 1927 | 6087923             | 2990205 | 3097718  | 2875                                       | 1277                             | 1598                               | 921                                      | 736                            | 185                              |
| 1928 | 6105190             | 2999562 | 3105628  | 444                                        | 207                              | 237                                | 855                                      | 703                            | 152                              |
| 1929 | 6120080             | 3007946 | 3112134  | 1345                                       | 573                              | 772                                | 944                                      | 761                            | 183                              |
| 1930 | 6142191             | 3020848 | 3121343  | 319                                        | 146                              | 173                                | 970                                      | 777                            | 193                              |
| 1931 | 6162446             | 3037064 | 3125382  | 2518                                       | 1025                             | 1493                               | 1015                                     | 804                            | 211                              |
| 1932 | 6190364             | 3053528 | 3136836  | 531                                        | 228                              | 303                                | 1094                                     | 910                            | 184                              |
| 1933 | 6211566             | 3066888 | 3144678  | 673                                        | 300                              | 373                                | 1063                                     | 852                            | 211                              |
| 1934 | 6233090             | 3079690 | 3153400  | 303                                        | 133                              | 170                                | 953                                      | 777                            | 176                              |
| 1935 | 6250506             | 3090451 | 3160055  | 685                                        | 316                              | 369                                | 969                                      | 768                            | 201                              |
| 1936 | 6266888             | 3100534 | 3166354  | 646                                        | 275                              | 371                                | 1045                                     | 825                            | 220                              |
| 1937 | 6284722             | 3111256 | 3173466  | 1173                                       | 522                              | 651                                | 978                                      | 747                            | 231                              |
| 1938 | 6310214             | 3125000 | 3185214  | 190                                        | 95                               | 95                                 | 996                                      | 779                            | 217                              |
| 1939 | 6341303             | 3142356 | 3198947  | 740                                        | 319                              | 421                                | 1022                                     | 800                            | 222                              |
| 1940 | 6371432             | 3160128 | 3211304  | 318                                        | 142                              | 176                                | 1086                                     | 858                            | 228                              |
| 1941 | 6406474             | 3180535 | 3225939  | 1082                                       | 434                              | 648                                | 1009                                     | 784                            | 225                              |
| 1942 | 6458200             | 3207756 | 3250444  | 96                                         | 43                               | 53                                 | 922                                      | 697                            | 225                              |
| 1943 | 6522827             | 3240631 | 3282196  | 204                                        | 95                               | 109                                | 982                                      | 719                            | 263                              |
| 1944 | 6597348             | 3279723 | 3317625  | 172                                        | 83                               | 89                                 | 858                                      | 671                            | 187                              |
| 1945 | 6673749             | 3321502 | 3352247  | 70                                         | 22                               | 48                                 | 1018                                     | 761                            | 257                              |
| 1946 | 6763685             | 3366694 | 3396991  | 291                                        | 111                              | 180                                | 1044                                     | 777                            | 267                              |
| 1947 | 6842046             | 3407577 | 3434469  | 316                                        | 133                              | 183                                | 1008                                     | 770                            | 238                              |

Supplementary material

|      |         |         |         |     |     |     |      |      |     |
|------|---------|---------|---------|-----|-----|-----|------|------|-----|
| 1948 | 6924888 | 3448122 | 3476766 | 25  | 8   | 17  | 1000 | 774  | 226 |
| 1949 | 6986181 | 3479079 | 3507102 | 54  | 20  | 34  | 1130 | 814  | 316 |
| 1950 | 7041829 | 3506442 | 3535387 | 80  | 44  | 36  | 1043 | 799  | 244 |
| 1951 | 7098740 | 3535736 | 3563004 | 522 | 208 | 314 | 1145 | 879  | 266 |
| 1952 | 7150606 | 3562475 | 3588131 | 112 | 45  | 67  | 1192 | 934  | 258 |
| 1953 | 7192316 | 3583598 | 3608718 | 347 | 145 | 202 | 1332 | 1008 | 324 |
| 1954 | 7234664 | 3605013 | 3629651 | 553 | 248 | 305 | 1225 | 918  | 307 |
| 1955 | 7290112 | 3633983 | 3656129 | 74  | 32  | 42  | 1293 | 983  | 310 |
| 1956 | 7338991 | 3659917 | 3679074 | 64  | 31  | 33  | 1474 | 1137 | 337 |
| 1957 | 7388611 | 3685654 | 3702957 | 649 | 327 | 322 | 1463 | 1145 | 318 |
| 1958 | 7429675 | 3706039 | 3723636 | 297 | 137 | 160 | 1282 | 959  | 323 |
| 1959 | 7462823 | 3722867 | 3739956 | 184 | 79  | 105 | 1350 | 1012 | 338 |
| 1960 | 7497967 | 3740119 | 3757848 | 801 | 378 | 423 | 1305 | 981  | 324 |
| 1961 | 7542028 | 3763040 | 3778988 | 98  | 47  | 51  | 1273 | 960  | 313 |
| 1962 | 7581148 | 3782252 | 3798896 | 154 | 71  | 83  | 1396 | 1043 | 353 |
| 1963 | 7627507 | 3805699 | 3821808 | 319 | 160 | 159 | 1406 | 1028 | 378 |
| 1964 | 7695200 | 3840897 | 3854303 | 39  | 12  | 27  | 1514 | 1096 | 418 |
| 1965 | 7772506 | 3882473 | 3890033 | 243 | 124 | 119 | 1459 | 1068 | 391 |
| 1966 | 7843088 | 3919170 | 3923918 | 157 | 68  | 89  | 1566 | 1145 | 421 |
| 1967 | 7892774 | 3942223 | 3950551 | 156 | 64  | 92  | 1702 | 1254 | 448 |
| 1968 | 7934996 | 3961414 | 3973582 | 291 | 108 | 183 | 1702 | 1240 | 462 |

review only

## Supplementary material

**Supplementary material. Model diagnostics**

We carried out several types of model diagnostics, including Portmanteau test for white noise to check autocorrelation in residuals, Breusch-Pagan/Cook-Weisberg test for heteroscedasticity, Jarque-Bera test on normality, and the regression specification error tests that indicates whether there is a misspecification in the model. We also performed tests for stability of the models by using the cumulative sum of recursive residuals and their squares to test whether there is a structural break due to changes in regression coefficients over time.

**Supplementary material. STATA codes for the non-linear autoregressive distributed lag (NARDL) modelling of association between influenza death rates and suicide rates**

```

clear
use "Z:\Influenza_deaths_suicides\ALL19101978.dta"

///// 1. DATA MANAGEMENT: generate and label variables to be used in the analyses

/// Labels for original variables (retrieved from the Statistical Yearbooks 1910-1978)

lab var year "Years 1910-1978"

lab var number_population_all "Total number of inhabitants (population size) in Sweden in corresponding year"
lab var number_population_men "Total number of male population in Sweden in corresponding year"
lab var number_population_women "Total number of female population in Sweden in corresponding year"

lab var number_influenza_all "Number of deaths from influenza in total population in corresponding year"
lab var number_influenza_men "Number of deaths from influenza among men in corresponding year"
lab var number_influenza_women "Number of deaths from influenza among women in corresponding year"

lab var number_suicide_all "Number of suicides in total population in corresponding year"
lab var number_suicide_men "Number of suicides among men in corresponding year"
lab var number_suicide_women "Number of suicides among women in corresponding year"

/// Calculation of annual influenza death rates and suicide rates per 100,000 for total population, men, and women

gen influenza_rates_all = (number_influenza_all/number_population_all)*100000
gen influenza_rates_men = (number_influenza_men/number_population_men)*100000
gen influenza_rates_women = (number_influenza_women/number_population_women)*100000

gen suicide_rates_all = (number_suicide_all/number_population_all)*100000
gen suicide_rates_men = (number_suicide_men/number_population_men)*100000
gen suicide_rates_women = (number_suicide_women/number_population_women)*100000

lab var influenza_rates_all "Influenza death rates for total population per 100,000, annual"
lab var influenza_rates_men "Influenza death rates among men per 100,000, annual"
lab var influenza_rates_women "Influenza death rates among women per 100,000, annual"

lab var suicide_rates_all "Suicide rates for total population per 100,000, annual"
lab var suicide_rates_men "Suicide rates among men per 100,000, annual"
lab var suicide_rates_women "Suicide rates among women per 100,000, annual"

/// Logarithmic transformation for suicide rates for total population, men, and women

```



## Supplementary material

```

1
2
3   gen ln_suicide_rates_all = ln(suicide_rates_all)
4   gen ln_suicide_rates_men = ln(suicide_rates_men)
5   gen ln_suicide_rates_women = ln(suicide_rates_women)
6
7   lab var ln_suicide_rates_all "Log-transformed suicide rates for total population per 100,000, annual"
8   lab var ln_suicide_rates_men "Log-transformed suicide rates among men per 100,000, annual"
9   lab var ln_suicide_rates_women "Log-transformed suicide rates among women per 100,000, annual"
10
11
12
13  /// Variables for changes in death registration in Sweden 1910-1978 (as dummy variables)
14
15  // based on the Bertillon criteria (prior to 1931)
16  gen registration_19101930=0
17  replace registration_19101930=1 if year<=1930
18  lab var registration_19101930 "Dummy variable for death registration in 1910-1930 (Bertillon)"
19
20  // introduced in cooperation with other Nordic countries (1931-1950)
21  gen registration_19311950=0
22  replace registration_19311950=1 if year>=1931 & year<=1950
23  lab var registration_19311950 "Dummy variable for death registration in 1931-1950 (new registration)"
24
25  // ICD-6 (1951-1957)
26  gen registration_19511957=0
27  replace registration_19511957=1 if year>=1951 & year<=1957
28  lab var registration_19511957 "Dummy variable for death registration in 1951-1957 (ICD-6)"
29
30  // ICD-7 (1958-1968)
31  gen registration_19581968=0
32  replace registration_19581968=1 if year>=1958 & year<=1968
33  lab var registration_19581968 "Dummy variable for death registration in 1958-1968 (ICD-7)"
34
35  // ICD-8 (1969-1978)
36  gen registration_1969after=0
37  replace registration_1969after=1 if year>=1969
38  lab var registration_1969after "Dummy variable for death registration in 1969 and after (ICD-8)"
39  ///////////////////////////////////////////////////////////////////
40
41
42  ///// 2. CHECKING VARIABLES' PROPERTIES AND TESTING THE CONDITIONS FOR MODELLING
43
44
45  /// Declare data to be time-series data
46  tsset year, yearly
47
48
49  /// Obtain optimal lags for each variable (for (i) augmentation in ADF and KPSS tests, and (ii) for p and q
50  parameters in NARDL).
51  /// Lags obtained for influenza death rates and logarithmically-transformed suicide rates for total population,
52  men, and women, and for time periods 1910-1978, 1918-1956, and 1957-1978
53  /// If AIC, HQIC, and SBIC information criteria indicated different lag orders, SBIC was used to select optimal
54  lags
55
56  varsoc influenza_rates_all
57  varsoc influenza_rates_all if tin(1918, 1956)
58  varsoc influenza_rates_all if tin(1957, )
59
60  varsoc influenza_rates_men

```

## Supplementary material

```

1
2
3 varsoc influenza_rates_men if tin(1918, 1956)
4 varsoc influenza_rates_men if tin(1957, )
5
6 varsoc influenza_rates_women
7 varsoc influenza_rates_women if tin(1918, 1956)
8 varsoc influenza_rates_women if tin(1957, )
9
10 varsoc ln_suicide_rates_all
11 varsoc ln_suicide_rates_all if tin(1918, 1956)
12 varsoc ln_suicide_rates_all if tin(1957, )
13
14 varsoc ln_suicide_rates_men
15 varsoc ln_suicide_rates_men if tin(1918, 1956)
16 varsoc ln_suicide_rates_men if tin(1957, )
17
18 varsoc ln_suicide_rates_women
19 varsoc ln_suicide_rates_women if tin(1918, 1956)
20 varsoc ln_suicide_rates_women if tin(1957, )
21
22 /// Tests for stationarity: ADF and KPSS for influenza death rates and logarithmically-transformed suicide rates
23 variables for total population, men, and women
24 /// Augmentation by at least one lag was used (for suicide rates in women - by two lags according to SBIC in
25 varsoc)
26
27 dfuller influenza_rates_all, lag(1)
28 dfuller influenza_rates_men, lag(1)
29 dfuller influenza_rates_women, lag(1)
30
31 dfuller ln_suicide_rates_all, lag(1)
32 dfuller ln_suicide_rates_men, lag(1)
33 dfuller ln_suicide_rates_women, lag(1)
34 dfuller ln_suicide_rates_women, lag(2)
35
36 dfuller D.influenza_rates_all, lag(1)
37 dfuller D.influenza_rates_men, lag(1)
38 dfuller D.influenza_rates_women, lag(1)
39
40 dfuller D.ln_suicide_rates_all, lag(1)
41 dfuller D.ln_suicide_rates_men, lag(1)
42 dfuller D.ln_suicide_rates_women, lag(1)
43 dfuller D.ln_suicide_rates_women, lag(2)
44
45 kpss influenza_rates_all, maxlag(1) notrend
46 kpss influenza_rates_men, maxlag(1) notrend
47 kpss influenza_rates_women, maxlag(1) notrend
48
49 kpss ln_suicide_rates_all, maxlag(1) notrend
50 kpss ln_suicide_rates_men, maxlag(1) notrend
51 kpss ln_suicide_rates_women, maxlag(2) notrend
52
53 kpss D.influenza_rates_all, maxlag(1) notrend
54 kpss D.influenza_rates_men, maxlag(1) notrend
55 kpss D.influenza_rates_women, maxlag(1) notrend
56
57 kpss D.ln_suicide_rates_all, maxlag(1) notrend
58 kpss D.ln_suicide_rates_men, maxlag(1) notrend
59 kpss D.ln_suicide_rates_women, maxlag(2) notrend
60

```

## Supplementary material

1  
2  
3  
4 *////* 3. ESTIMATION OF NON-LINEAR AUTOREGRESSIVE DISTRIBUTED LAG (NARDL) MODELS:  
5 for total population, men, and women, and for time periods 1910-1978, 1918-1956, and 1957-1978  
6 *///* The dependent and independent variables are indicated in levels.  
7 *///* The covariates (i.e., changes in death registration system 1910-1978) are included with the deterministic  
8 option, but these were only kept in the models if statistically significant.  
9 *///* The optimal number of lags for dependent and independent variables (p and q parameters, respectively).  
10 *///* Since p and q parameters refer to levels, one additional lag is added to p and q to get an optimal lag length in  
11 differences (p and q must be at least 2).  
12 *///* The model provides an output for a long-term cointegration bounds test and diagnostic tests.

13  
14 `nardl ln_suicide_rates_all influenza_rates_all, p(2) q(2) h(69) plot bootstrap(100) level(95) residuals /* used as  
15 a final model */`

16 `nardl ln_suicide_rates_all influenza_rates_all, p(2) q(2) deterministic(registration_19101930  
17 registration_19311950 registration_19511957 registration_19581968 registration_1969after) h(69) plot  
18 bootstrap(100) level(95) residuals`

19  
20 `nardl ln_suicide_rates_men influenza_rates_men, p(2) q(2) h(69) plot bootstrap(100) level(95) residuals /* used  
21 as a final model */`

22 `nardl ln_suicide_rates_men influenza_rates_men, p(2) q(2) deterministic(registration_19101930  
23 registration_19311950 registration_19511957 registration_19581968 registration_1969after) h(69) plot  
24 bootstrap(100) level(95) residuals`

25  
26 `nardl ln_suicide_rates_women influenza_rates_women, p(3) q(2) h(69) plot bootstrap(100) level(95) residuals  
27 /* used as a final model */`

28 `nardl ln_suicide_rates_women influenza_rates_women, p(3) q(2) deterministic(registration_19101930  
29 registration_19311950 registration_19511957 registration_19581968 registration_1969after) h(69) plot  
30 bootstrap(100) level(95) residuals`

31  
32 `nardl ln_suicide_rates_all influenza_rates_all if tin(1918,1956), p(2) q(2) h(39) plot bootstrap(50) level(95)  
33 residuals`

34 `nardl ln_suicide_rates_men influenza_rates_men if tin(1918,1956), p(2) q(2) h(39) plot bootstrap(50) level(95)  
35 residuals`

36 `nardl ln_suicide_rates_women influenza_rates_women if tin(1918,1956), p(5) q(2) h(39) plot bootstrap(50)  
37 level(95) residuals`

38 `nardl ln_suicide_rates_all influenza_rates_all if tin(1957, ), p(2) q(2) h(22) plot bootstrap(50) level(95) residuals`  
39 `nardl ln_suicide_rates_men influenza_rates_men if tin(1957, ), p(2) q(2) h(22) plot bootstrap(50) level(95)  
40 residuals`

41 `nardl ln_suicide_rates_women influenza_rates_women if tin(1957, ), p(2) q(2) h(22) plot bootstrap(50)  
42 level(95) residuals`

43  
44  
45 */\* REFERENCES*

46 For varsoc and dfuller:

47 StataCorp. Stata 15 Base Reference Manual. College Station, TX: Stata Press; 2017

48  
49 For kpss:

50 Author: Christopher F Baum, Boston College, USA [baum@@bc.edu](mailto:baum@@bc.edu)

51 Kwiatkowski, D., Phillips, P.C.B., Schmidt, P. and Y. Shin. Testing the null hypothesis of stationarity against  
52 the alternative of a unit root: How sure are we that economic time series have a unit root? Journal of  
53 Econometrics, 54, 1992, 159-178.

54 Lee, D. and P. Schmidt. On the power of the KPSS test of stationarity against fractionally-integrated alternatives.  
55 Journal of Econometrics, 73, 1996, 285-302.

56 Schwert, G.W. Tests for Unit Roots: A Monte Carlo Investigation. Journal of Business and Economic Statistics,  
57 7, 1989, 147-160.

58  
59 For nardl:  
60

## Supplementary material

1  
2  
3 Author: Stata implementation by Marco Sunder (sunder@wifa.uni-leipzig.de). This version was created on  
4 26jan2012.

5 Shin, Y., Yu, B., Greenwood-Nimmo, M. (2011): Modelling asymmetric cointegration and dynamic multipliers  
6 in a nonlinear ARDL framework. Working paper (version of November 2011),  
7 <http://ssrn.com/abstract=1807745>. \*/

8  
9 end of do-file  
10  
11  
12  
13  
14  
15  
16  
17  
18  
19  
20  
21  
22  
23  
24  
25  
26  
27  
28  
29  
30  
31  
32  
33  
34  
35  
36  
37  
38  
39  
40  
41  
42  
43  
44  
45  
46  
47  
48  
49  
50  
51  
52  
53  
54  
55  
56  
57  
58  
59  
60

For peer review only

Supplementary material

eTable 2. Unit root tests at the level and first difference by Augmented Dickey-Fuller (ADF) and Kwiatkowski-Phillips-Schmidt-Shin (KPSS) test statistics

|                                       | ADF at level   |         | KPSS at level  |                      | Results for stationarity at the level | ADF at first difference |         | KPSS at first difference |                      | Results for stationarity at the 1 <sup>st</sup> difference | Order of integration |
|---------------------------------------|----------------|---------|----------------|----------------------|---------------------------------------|-------------------------|---------|--------------------------|----------------------|------------------------------------------------------------|----------------------|
|                                       | Test statistic | p-value | Test statistic | p-value <sup>1</sup> |                                       | Test statistic          | p-value | Test statistic           | p-value <sup>1</sup> |                                                            |                      |
| <b>Suicide rate (log-transformed)</b> |                |         |                |                      |                                       |                         |         |                          |                      |                                                            |                      |
| All                                   | -2.181         | 0.213   | 1.980          | <0.001               | nonstationary                         | -6.640                  | <0.001  | 0.068                    | >0.1                 | stationary                                                 | 1                    |
| Males                                 | -3.230         | 0.018   | 0.964          | <0.001               | nonstationary                         | -6.512                  | <0.001  | 0.053                    | >0.1                 | stationary                                                 | 1                    |
| Females                               | -0.517         | 0.889   | 3.130          | <0.001               | nonstationary                         | -8.692                  | <0.001  | 0.104                    | >0.1                 | stationary                                                 | 1                    |
| <b>Influenza death rate</b>           |                |         |                |                      |                                       |                         |         |                          |                      |                                                            |                      |
| All                                   | -4.895         | <0.001  | 0.461          | >0.1                 | stationary                            | -8.727                  | <0.001  | <i>0.016</i>             | >0.1                 | <i>stationary</i>                                          | 0                    |
| Males                                 | -4.856         | <0.001  | 0.431          | >0.1                 | stationary                            | -8.642                  | <0.001  | <i>0.016</i>             | >0.1                 | <i>stationary</i>                                          | 0                    |
| Females                               | -4.940         | <0.001  | 0.491          | >0.1                 | stationary                            | -8.824                  | <0.001  | <i>0.015</i>             | >0.1                 | <i>stationary</i>                                          | 0                    |

Note: For the ADF test, the null hypothesis implies that the variable contains a unit root (the alternate hypothesis is that the variable is stationary), whereas for the KPSS test the null hypothesis implies that the variable is stationary (the alternate hypothesis is that there is a unit root). The results for ADF and KPSS tests for stationarity at first difference for influenza death rates are reported as explanatory (written in Italics) since the stationarity at the level has already been established (i.e., integrated of the order zero).

<sup>1</sup> KPSS test results do not indicate the exact p-value, but report the level of significance at which the null hypothesis is rejected (1%, 2.5%, 5%, or 10% significance level).

Abbreviations: ADF, Augmented Dickey-Fuller unit-root test; KPSS, Kwiatkowski-Phillips-Schmidt-Shin test for stationarity

## Supplementary material

**eTable 3. Full specification for non-linear autoregressive distributed lag models used for the analysis of short-term and long-term relationship of suicide rates with positive and negative changes in influenza death rates among the whole population, men, and women in 1910-1978 in Sweden**

|                             | Whole population               |         | Men                            |         | Women                           |         |
|-----------------------------|--------------------------------|---------|--------------------------------|---------|---------------------------------|---------|
|                             | Coefficient (95% CI)           | p-value | Coefficient (95% CI)           | p-value | Coefficient (95% CI)            | p-value |
| LnSuicide, lag 1            | -0.08466 (-0.23940 to 0.07009) | 0.278   | -0.11457 (-0.30588 to 0.07674) | 0.235   | -0.04517 (-0.15832 to 0.06799)  | 0.427   |
| Influenza +, lag 1          | -0.00001 (-0.00761 to 0.00759) | 0.998   | -0.00150 (-0.01032 to 0.00732) | 0.734   | 0.00508 (-0.00366 to 0.01382)   | 0.249   |
| Influenza -, lag 1          | -0.00018 (-0.00775 to 0.00739) | 0.962   | -0.00165 (-0.01044 to 0.00714) | 0.708   | 0.00487 (-0.00383 to 0.01358)   | 0.267   |
| $\Delta$ LnSuicide, lag 1   | -0.14610 (-0.43113 to 0.13893) | 0.309   | 0.029465 (-0.27204 to 0.33097) | 0.846   | -0.65184 (-0.91785 to -0.38582) | <0.001  |
| $\Delta$ LnSuicide, lag 2   | NA                             | NA      | NA                             | NA      | -0.30807 (-0.55722 to -0.05892) | 0.016   |
| $\Delta$ Influenza +        | 0.00002 (-0.00036 to 0.00039)  | 0.931   | 0.00004 (-0.00034 to 0.00041)  | 0.854   | -0.00007 (-0.00056 to 0.00041)  | 0.760   |
| $\Delta$ Influenza +, lag 1 | 0.00153 (-0.00285 to 0.00590)  | 0.488   | 0.00085 (-0.00347 to 0.00518)  | 0.694   | 0.00093 (-0.00482 to 0.00668)   | 0.747   |
| $\Delta$ Influenza -        | 0.00103 (-0.00579 to 0.00785)  | 0.764   | -0.00192 (-0.01005 to 0.00621) | 0.638   | 0.00780 (0.00015 to 0.01544)    | 0.046   |
| $\Delta$ Influenza -, lag 1 | -0.00070 (-0.00236 to 0.00096) | 0.401   | -0.00038 (-0.00212 to 0.00136) | 0.663   | -0.000075 (-0.00289 to 0.00139) | 0.488   |
| <b>Long-term effect</b>     |                                |         |                                |         |                                 |         |
| Influenza +                 | -0.00012                       | 0.998   | -0.01314                       | 0.745   | 0.11254                         | 0.538   |
| Influenza -                 | 0.00211                        | 0.962   | 0.01443                        | 0.722   | -0.10789                        | 0.544   |
| <b>Model diagnostics</b>    |                                |         |                                |         |                                 |         |

Supplementary material

|                                      |                                        |       |                                        |       |                                        |       |
|--------------------------------------|----------------------------------------|-------|----------------------------------------|-------|----------------------------------------|-------|
| Q-test for autocorrelation, $\chi^2$ | 40.160                                 | 0.125 | 35.260                                 | 0.273 | 31.850                                 | 0.424 |
| Heteroscedasticity, $\chi^2$         | 3.649                                  | 0.056 | 5.439                                  | 0.020 | 1.280                                  | 0.258 |
| Normality, $\chi^2$                  | 2.826                                  | 0.243 | 2.237                                  | 0.327 | 2.372                                  | 0.305 |
| RESET, F-statistics                  | 4.656                                  | 0.006 | 5.473                                  | 0.023 | 1.013                                  | 0.394 |
| CUSUM                                | Stable, no structural break            | NA    | Stable, no structural break            | NA    | Stable, no structural break            | NA    |
| CUSUMQ                               | Stable                                 | NA    | Stable                                 | NA    | Stable                                 | NA    |
| Adj. R <sup>2</sup>                  | 0.257                                  | NA    | 0.300                                  | NA    | 0.374                                  | NA    |
| Wald <sub>SR</sub> , F-statistics    | 0.054                                  | 0.817 | 0.275                                  | 0.602 | 1.062                                  | 0.307 |
| Wald <sub>LR</sub> , F-statistics    | 1.206                                  | 0.277 | 1.176                                  | 0.283 | 0.771                                  | 0.384 |
| <b>Cointegration test statistics</b> |                                        |       |                                        |       |                                        |       |
| t_BDM                                | -1.095                                 | NA    | -1.199                                 | NA    | -0.799                                 | NA    |
| F_PSS                                | 3.789                                  | NA    | 3.735                                  | NA    | 2.530                                  | NA    |
| <b>Critical values for F_PSS</b>     |                                        |       |                                        |       |                                        |       |
| 5% critical values; I(0), I(1)       | k=1: 5.055, 5.915<br>k=2: 3.947, 5.020 | NA    | k=1: 5.055, 5.915<br>k=2: 3.947, 5.020 | NA    | k=1: 5.055, 5.915<br>k=2: 3.947, 5.020 | NA    |

Note: F\_PSS denotes F-statistics for Pesaran/Shin/Smith bounds test with null hypothesis of no cointegration. Critical values are retrieved from Narayan PK (2005) for a sample size of n=70.[1] The null hypothesis of no cointegration is supported if F\_PSS statistics is lower than 5% I(0) critical value; the null hypothesis is rejected if F\_PSS statistics is greater than 5% I(1) critical value. We applied a conservative approach to considering the number of exposure variables (k), as suggested by Shin Y, et al (2014) [2] (since influenza death rates represent one exposure (k=1), while the analysis actually partitions the

## Supplementary material

1  
2 exposure to positive and negative changes ( $k=2$ ). In a given table, the results of  $F_{PSS}$  for the whole population, men, and women are lower than the reported  
3 5%  $I(0)$  critical values that accepts a null hypothesis of no cointegration.  
4

5 “LnSuicide” indicates that suicide rates were logarithmically-transformed. “ $\Delta$ ” signifies the series is differenced. Signs as “+” and “-” denote the exposure  
6 variable being partitioned in positive and negative changes, respectively. “NA” denotes that a certain test or test parameter is not applicable.

7 Number of lags used for each variable in the model are noted by “lag#”. To select the optimal number of lags to be used for choosing  $p$  and  $q$  parameters for the  
8 NARDL (i.e., numbers of lags for dependent and independent variables, respectively), we applied a varsoc command in STATA using the minimal values of  
9 Akaike Information Criterion, Schwarz’s Bayesian information criterion (SBIC), and the Hannan and Quinn information criterion information criteria. If  
10 information criteria indicated different lag orders, SBIC was used to select optimal lags. Thus, for the analysis of the whole population and men, both exposure  
11 and outcome time series were lagged once, while for analysis among women to outcome time series were lagged twice and exposure time series were lagged  
12 once.

13 Wald test for asymmetry in a short-term ( $Wald_{SR}$ ) and long-term ( $Wald_{LR}$ ) has a null hypothesis of no cointegration. Q-test for autocorrelation reports the results  
14 of Portmanteau test for white noise. Heteroscedasticity is measured by Breusch-Pagan/Cook-Weisberg test. Normality is measured by Jarque-Bera test. RESET  
15 statistics refers to the regression specification error tests. CUSUM and CUSUMQ refer to the tests of the cumulative sum of recursive residuals and their squares,  
16 respectively. “Stable, no structural break” in the results of CUSUM indicates that the model was found stable and the null hypothesis of no structural break was  
17 not rejected (same applies to “Stable” as an output for CUSUMQ).  
18  
19  
20  
21  
22  
23  
24  
25  
26  
27  
28  
29  
30  
31  
32  
33  
34  
35  
36  
37  
38  
39  
40  
41  
42  
43  
44  
45  
46



## Supplementary material

**eTable 4. Full specification for non-linear autoregressive distributed lag models used for the analysis of short-term and long-term relationship of suicide rates with positive and negative changes in influenza death rates among the whole population, men, and women in 1918-1956 in Sweden**

|                         | Whole population               |         | Men                             |         | Women                          |         |
|-------------------------|--------------------------------|---------|---------------------------------|---------|--------------------------------|---------|
|                         | Coefficient (95% CI)           | p-value | Coefficient (95% CI)            | p-value | Coefficient (95% CI)           | p-value |
| LnSuicide, lag 1        | -0.32229 (-0.73472 to 0.09015) | 0.121   | -0.26417 (-0.60333 to 0.07492)  | 0.122   | -0.36067 (-0.97384 to 0.25250) | 0.238   |
| Influenza +, lag 1      | 0.00003 (-0.00851 to 0.00858)  | 0.994   | -0.00129 (-0.011384 to 0.00879) | 0.795   | 0.00506 (-0.00682 to 0.01695)  | 0.390   |
| Influenza -, lag 1      | -0.00033 (-0.00869 to 0.00803) | 0.936   | -0.00145 (-0.01129 to 0.00840)  | 0.766   | 0.00396 (-0.00801 to 0.01593)  | 0.503   |
| ΔLnSuicide, lag 1       | -0.19387 (-0.59955 to 0.21181) | 0.337   | -0.03045 (-0.44243 to 0.38153)  | 0.881   | -0.58189 (-1.19784 to 0.03406) | 0.063   |
| ΔLnSuicide, lag 2       | NA                             | NA      | NA                              | NA      | -0.36148 (-0.91643 to 0.19346) | 0.193   |
| ΔLnSuicide, lag 3       | NA                             | NA      | NA                              | NA      | -0.11520 (-0.61658 to 0.38617) | 0.641   |
| ΔLnSuicide, lag 4       | NA                             | NA      | NA                              | NA      | 0.11306 (-0.26409 to 0.49021)  | 0.544   |
| ΔInfluenza +            | 0.00002 (-0.00077 to 0.00082)  | 0.955   | -0.00014 (-0.00102 to 0.00075)  | 0.755   | 0.00098 (-0.00068 to 0.00263)  | 0.237   |
| ΔInfluenza +, lag 1     | 0.00140 (-0.00347 to 0.00627)  | 0.561   | 0.00095 (-0.00389 to 0.00580)   | 0.691   | -0.00063 (-0.00821 to 0.00696) | 0.866   |
| ΔInfluenza -            | 0.00087 (-0.00643 to 0.00817)  | 0.809   | -0.00132 (-0.01001 to 0.00741)  | 0.760   | 0.00434 (-0.00595 to 0.01463)  | 0.394   |
| ΔInfluenza -, lag 1     | -0.00076 (-0.00256 to 0.00104) | 0.396   | -0.00044 (-0.00233 to 0.00145)  | 0.637   | -0.00052 (-0.00328 to 0.00224) | 0.704   |
| <b>Long-term effect</b> |                                |         |                                 |         |                                |         |
| Influenza +             | 0.00011                        | 0.994   | -0.00490                        | 0.802   | 0.01403                        | 0.521   |

## Supplementary material

|                                      |                                        |       |                                        |       |                                        |       |
|--------------------------------------|----------------------------------------|-------|----------------------------------------|-------|----------------------------------------|-------|
| Influenza –                          | 0.00103                                | 0.936 | 0.00548                                | 0.775 | -0.01098                               | 0.600 |
| <b>Model diagnostics</b>             |                                        |       |                                        |       |                                        |       |
| Q-test for autocorrelation, $\chi^2$ | 14.130                                 | 0.658 | 9.674                                  | 0.917 | 9.614                                  | 0.919 |
| Heteroscedasticity, $\chi^2$         | 0.939                                  | 0.333 | 0.768                                  | 0.381 | 5.042                                  | 0.025 |
| Normality, $\chi^2$                  | 0.420                                  | 0.811 | 0.132                                  | 0.936 | 2.383                                  | 0.304 |
| RESET, F-statistics                  | 0.413                                  | 0.745 | 0.764                                  | 0.524 | 0.505                                  | 0.683 |
| CUSUM                                | Stable, no structural break            | NA    | Stable, no structural break            | NA    | Stable, no structural break            | NA    |
| CUSUMQ                               | Stable                                 | NA    | Stable                                 | NA    | Stable                                 | NA    |
| Adj. R <sup>2</sup>                  | 0.309                                  | NA    | 0.345                                  | NA    | 0.432                                  | NA    |
| Wald <sub>SR</sub> , F-statistics    | 0.056                                  | 0.815 | 0.155                                  | 0.697 | 0.183                                  | 0.673 |
| Wald <sub>LR</sub> , F-statistics    | 1.555                                  | 0.222 | 0.217                                  | 0.645 | 4.479                                  | 0.044 |
| <b>Cointegration test statistics</b> |                                        |       |                                        |       |                                        |       |
| t_BDM                                | -1.596                                 | NA    | -1.591                                 | NA    | -1.207                                 | NA    |
| F_PSS                                | 1.009                                  | NA    | 1.019                                  | NA    | 1.328                                  | NA    |
| <b>Critical values for F_PSS</b>     |                                        |       |                                        |       |                                        |       |
| 5% critical values; I(0) to I(1)     | k=1: 5.260, 6.160<br>k=2: 4.133, 5.260 | NA    | k=1: 5.260, 6.160<br>k=2: 4.133, 5.260 | NA    | k=1: 5.260, 6.160<br>k=2: 4.133, 5.260 | NA    |

## Supplementary material

1  
2  
3 *Note:* F\_PSS denotes F-statistics for Pesaran/Shin/Smith bounds test with null hypothesis of no cointegration. Critical values are retrieved from Narayan PK  
4 (2005) for a sample size of n=40 [1]. The null hypothesis of no cointegration is supported if F\_PSS statistics is lower than 5% I(0) critical value; the null  
5 hypothesis is rejected if F\_PSS statistics is greater than 5% I(1) critical value. We applied a conservative approach to considering the number of exposure  
6 variables (k), as suggested by Shin Y, et al (2014) [2] (since influenza death rates represent one exposure (k=1), while the analysis actually partitions the  
7 exposure to positive and negative changes (k=2)). In a given table, the results of F\_PSS for the whole population, men, and women are lower than the reported  
8 5% I(0) critical values that accepts a null hypothesis of no cointegration.

9 “LnSuicide” indicates that suicide rates were logarithmically-transformed. “Δ” signifies the series is differenced. Signs as “+” and “-” denote the exposure  
10 variable being partitioned in positive and negative changes, respectively. “NA” denotes that a certain test or test parameter is not applicable.

11 Number of lags used for each variable in the model are noted by “lag#”. To select the optimal number of lags to be used for choosing p and q parameters for the  
12 NARDL (i.e., numbers of lags for dependent and independent variables, respectively), we applied a varsoc command in STATA using the minimal values of  
13 Akaike Information Criterion, Schwarz’s Bayesian information criterion (SBIC), and the Hannan and Quinn information criterion information criteria. If  
14 information criteria indicated different lag orders, SBIC was used to select optimal lags. Thus, for the analysis of the whole population and men, both exposure  
15 and outcome time series were lagged once, while for analysis among women, outcome time series were lagged four times and exposure time series were lagged  
16 once.

17 Wald test for asymmetry in a short-term (Wald<sub>SR</sub>) and long-term (Wald<sub>LR</sub>) has a null hypothesis of no cointegration. Q-test for autocorrelation reports the results  
18 of Portmanteau test for white noise. Heteroscedasticity is measured by Breusch-Pagan/Cook-Weisberg test. Normality is measured by Jarque-Bera test. RESET  
19 statistics refers to the regression specification error tests. CUSUM and CUSUMQ refer to the tests of the cumulative sum of recursive residuals and their squares,  
20 respectively. “Stable, no structural break” in the results of CUSUM indicates that the model was found stable and the null hypothesis of no structural break was  
21 not rejected (same applies to “Stable” as an output for CUSUMQ).  
22  
23  
24  
25  
26  
27  
28  
29  
30  
31  
32  
33  
34  
35  
36  
37  
38  
39  
40  
41  
42  
43  
44  
45  
46

## Supplementary material

**eTable 5. Full specification for non-linear autoregressive distributed lag models used for the analysis of short-term and long-term relationship of suicide rates with positive and negative changes in influenza death rates among the whole population, men, and women in 1957-1978 in Sweden**

|                                      | Whole population                |         | Men                             |         | Women                           |         |
|--------------------------------------|---------------------------------|---------|---------------------------------|---------|---------------------------------|---------|
|                                      | Coefficient (95% CI)            | p-value | Coefficient (95% CI)            | p-value | Coefficient (95% CI)            | p-value |
| LnSuicide, lag 1                     | -0.64009 (-1.15104 to -0.12914) | 0.018   | -0.52238 (-1.11901 to 0.07425)  | 0.081   | -0.66040 (-1.04522 to -0.27558) | 0.003   |
| Influenza +, lag 1                   | 0.008034 (-0.02823 to 0.04429)  | 0.640   | -0.01385 (-0.05324 to 0.02553)  | 0.461   | 0.02702 (-0.00364 to 0.05768)   | 0.079   |
| Influenza -, lag 1                   | 0.00661 (-0.02823 to 0.04429)   | 0.699   | -0.01281 (-0.054045 to 0.02841) | 0.514   | 0.01895 (-0.01066 to 0.04857)   | 0.190   |
| $\Delta$ LnSuicide, lag 1            | 0.14293 (-0.41621 to 0.70206)   | 0.590   | -0.04565 (-0.70111 to 0.60981)  | 0.883   | 0.16936 (-0.25995 to 0.59868)   | 0.409   |
| $\Delta$ Influenza +                 | -0.00964 (-0.02252 to 0.00324)  | 0.883   | -0.00876 (-0.02738 to 0.00985)  | 0.328   | -0.00976 (-0.02033 to 0.00081)  | 0.068   |
| $\Delta$ Influenza +, lag 1          | -0.01999 (-0.04573 to 0.00574)  | 0.117   | -0.01837 (-0.04871 to 0.01197)  | 0.214   | -0.01298 (-0.04073 to 0.014772) | 0.331   |
| $\Delta$ Influenza -                 | 0.00194 (-0.02614 to 0.03003)   | 0.130   | -0.01531 (-0.04658 to 0.01596)  | 0.309   | 0.02155 (-0.00343 to 0.04653)   | 0.085   |
| $\Delta$ Influenza -, lag 1          | 0.00864 (-0.00271 to 0.02000)   | 0.124   | 0.01033 (-0.00294 to 0.02359)   | 0.116   | 0.00585 (-0.00565 to 0.01735)   | 0.292   |
| <b>Long-term effect</b>              |                                 |         |                                 |         |                                 |         |
| Influenza +                          | 0.01255                         | 0.618   | -0.02659                        | 0.541   | 0.04091                         | 0.064   |
| Influenza -                          | -0.01033                        | 0.684   | 0.024538                        | 0.582   | -0.02870                        | 0.184   |
| <b>Model diagnostics</b>             |                                 |         |                                 |         |                                 |         |
| Q-test for autocorrelation, $\chi^2$ | 5.662                           | 0.773   | 3.790                           | 0.925   | 5.243                           | 0.813   |

Supplementary material

|                                      |                                        |       |                                        |       |                                        |        |
|--------------------------------------|----------------------------------------|-------|----------------------------------------|-------|----------------------------------------|--------|
| Heteroscedasticity, $\chi^2$         | 0.102                                  | 0.750 | 0.155                                  | 0.694 | 0.079                                  | 0.778  |
| Normality, $\chi^2$                  | 1.569                                  | 0.456 | 1.627                                  | 0.443 | 1.237                                  | 0.537  |
| RESET, F-statistics                  | 5.839                                  | 0.014 | 3.348                                  | 0.064 | 1.089                                  | 0.398  |
| CUSUM                                | Stable, no structural break            | NA    | Stable, no structural break            | NA    | Stable, no structural break            | NA     |
| CUSUMQ                               | Stable                                 | NA    | Stable                                 | NA    | Stable                                 | NA     |
| Adj. R <sup>2</sup>                  | 0.246                                  | NA    | 0.337                                  | NA    | 0.371                                  | NA     |
| Wald <sub>SR</sub> , F-statistics    | 2.903                                  | 0.112 | 0.536                                  | 0.477 | 7.132                                  | 0.019  |
| Wald <sub>LR</sub> , F-statistics    | 0.922                                  | 0.354 | 0.297                                  | 0.595 | 26.74                                  | <0.001 |
| <b>Cointegration test statistics</b> |                                        |       |                                        |       |                                        |        |
| t_BDM                                | -2.706                                 | NA    | -1.891                                 | NA    | -3.707                                 | NA     |
| F_PSS                                | 2.649                                  | NA    | 2.075                                  | NA    | 4.688                                  | NA     |
| <b>Critical values for F_PSS</b>     |                                        |       |                                        |       |                                        |        |
| 5% critical values; I(0), I(1)       | k=1: 5.395, 6.350<br>k=2: 4.267, 5.473 | NA    | k=1: 5.395, 6.350<br>k=2: 4.267, 5.473 | NA    | k=1: 5.395, 6.350<br>k=2: 4.267, 5.473 | NA     |

Note: F\_PSS denotes F-statistics for Pesaran/Shin/Smith bounds test with null hypothesis of no cointegration. Critical values are retrieved from Narayan PK (2005) for a sample size of n=30 [1]. The null hypothesis of no cointegration is supported if F\_PSS statistics is lower than 5% I(0) critical value; the null hypothesis is rejected if F\_PSS statistics is greater than 5% I(1) critical value. We applied a conservative approach to considering the number of exposure variables (k), as suggested by Shin Y, et al (2014) [2] (since influenza death rates represent one exposure (k=1), while the analysis actually partitions the exposure to positive and negative changes (k=2)). In a given table, the results of F\_PSS for the whole population, men, and women are lower than the reported 5% I(0) critical values that accepts a null hypothesis of no cointegration.

## Supplementary material

1  
2  
3 “LnSuicide” indicates that suicide rates were logarithmically-transformed. “ $\Delta$ ” signifies the series is differenced. Signs as “+” and “-” denote the exposure  
4 variable being partitioned in positive and negative changes, respectively. “NA” denotes that a certain test or test parameter is not applicable.

5 Number of lags used for each variable in the model are noted by “lag#”. To select the optimal number of lags to be used for choosing p and q parameters for the  
6 NARDL (i.e., numbers of lags for dependent and independent variables, respectively), we applied a varsoc command in STATA using the minimal values of  
7 Akaike Information Criterion, Schwarz’s Bayesian information criterion (SBIC), and the Hannan and Quinn information criterion information criteria. If  
8 information criteria indicated different lag orders, SBIC was used to select optimal lags. Thus, for the analysis of the whole population, men, and women, both  
9 exposure and outcome time series were lagged once.

10 Wald test for asymmetry in a short-term ( $Wald_{SR}$ ) and long-term ( $Wald_{LR}$ ) has a null hypothesis of no cointegration. Q-test for autocorrelation reports the results  
11 of Portmanteau test for white noise. Heteroscedasticity is measured by Breusch-Pagan/Cook-Weisberg test. Normality is measured by Jarque-Bera test. RESET  
12 statistics refers to the regression specification error tests. CUSUM and CUSUMQ refer to the tests of the cumulative sum of recursive residuals and their squares,  
13 respectively. “Stable, no structural break” in the results of CUSUM indicates that the model was found stable and the null hypothesis of no structural break was  
14 not rejected (same applies to “Stable” as an output for CUSUMQ).

## REFERENCES

- 15  
16  
17  
18 1 Narayan PK. The saving and investment nexus for China: evidence from cointegration tests. *Applied Economics* 2005; **37**(17): 1979–1990.  
19 2 Shin Y, Yu B, Greenwood-Nimmo M. Modelling Asymmetric Cointegration and Dynamic Multipliers in a Nonlinear ARDL Framework. In: Sickles  
20 RC, Horrace WC, eds. *Festschrift in Honor of Peter Schmidt: Econometric Methods and Applications*. New York: Springer Science+Business Media,  
21 2014: 281–314.  
22  
23  
24  
25  
26  
27  
28  
29  
30  
31  
32  
33  
34  
35  
36  
37  
38  
39  
40  
41  
42  
43  
44  
45  
46

## STROBE Statement—checklist of items that should be included in reports of observational studies

|                              | Item No                                                                                                                                                                                                                                                                                                   | Recommendation                                                                                                                                                                                                                                                                                                                                                                                                                                                         | Page No |
|------------------------------|-----------------------------------------------------------------------------------------------------------------------------------------------------------------------------------------------------------------------------------------------------------------------------------------------------------|------------------------------------------------------------------------------------------------------------------------------------------------------------------------------------------------------------------------------------------------------------------------------------------------------------------------------------------------------------------------------------------------------------------------------------------------------------------------|---------|
| <b>Title and abstract</b>    | 1                                                                                                                                                                                                                                                                                                         | (a) Indicate the study's design with a commonly used term in the title or the abstract                                                                                                                                                                                                                                                                                                                                                                                 | 1       |
|                              |                                                                                                                                                                                                                                                                                                           | (b) Provide in the abstract an informative and balanced summary of what was done and what was found                                                                                                                                                                                                                                                                                                                                                                    | 2       |
| <b>Introduction</b>          |                                                                                                                                                                                                                                                                                                           |                                                                                                                                                                                                                                                                                                                                                                                                                                                                        |         |
| Background/rationale         | 2                                                                                                                                                                                                                                                                                                         | Explain the scientific background and rationale for the investigation being reported                                                                                                                                                                                                                                                                                                                                                                                   | 3       |
| Objectives                   | 3                                                                                                                                                                                                                                                                                                         | State specific objectives, including any prespecified hypotheses                                                                                                                                                                                                                                                                                                                                                                                                       | 3       |
| <b>Methods</b>               |                                                                                                                                                                                                                                                                                                           |                                                                                                                                                                                                                                                                                                                                                                                                                                                                        |         |
| Study design                 | 4                                                                                                                                                                                                                                                                                                         | Present key elements of study design early in the paper                                                                                                                                                                                                                                                                                                                                                                                                                | 3-4     |
| Setting                      | 5                                                                                                                                                                                                                                                                                                         | Describe the setting, locations, and relevant dates, including periods of recruitment, exposure, follow-up, and data collection                                                                                                                                                                                                                                                                                                                                        | 3-5     |
| Participants                 | 6                                                                                                                                                                                                                                                                                                         | (a) <i>Cohort study</i> —Give the eligibility criteria, and the sources and methods of selection of participants. Describe methods of follow-up<br><i>Case-control study</i> —Give the eligibility criteria, and the sources and methods of case ascertainment and control selection. Give the rationale for the choice of cases and controls<br><i>Cross-sectional study</i> —Give the eligibility criteria, and the sources and methods of selection of participants | 3-5     |
|                              |                                                                                                                                                                                                                                                                                                           | (b) <i>Cohort study</i> —For matched studies, give matching criteria and number of exposed and unexposed<br><i>Case-control study</i> —For matched studies, give matching criteria and the number of controls per case                                                                                                                                                                                                                                                 | n/a     |
| Variables                    | 7                                                                                                                                                                                                                                                                                                         | Clearly define all outcomes, exposures, predictors, potential confounders, and effect modifiers. Give diagnostic criteria, if applicable                                                                                                                                                                                                                                                                                                                               | 3-4     |
| Data sources/<br>measurement | 8*                                                                                                                                                                                                                                                                                                        | For each variable of interest, give sources of data and details of methods of assessment (measurement). Describe comparability of assessment methods if there is more than one group                                                                                                                                                                                                                                                                                   | 3-4     |
| Bias                         | 9                                                                                                                                                                                                                                                                                                         | Describe any efforts to address potential sources of bias                                                                                                                                                                                                                                                                                                                                                                                                              | 4       |
| Study size                   | 10                                                                                                                                                                                                                                                                                                        | Explain how the study size was arrived at                                                                                                                                                                                                                                                                                                                                                                                                                              | 4       |
| Quantitative variables       | 11                                                                                                                                                                                                                                                                                                        | Explain how quantitative variables were handled in the analyses. If applicable, describe which groupings were chosen and why                                                                                                                                                                                                                                                                                                                                           | 5       |
| Statistical methods          | 12                                                                                                                                                                                                                                                                                                        | (a) Describe all statistical methods, including those used to control for confounding                                                                                                                                                                                                                                                                                                                                                                                  | 5       |
|                              |                                                                                                                                                                                                                                                                                                           | (b) Describe any methods used to examine subgroups and interactions                                                                                                                                                                                                                                                                                                                                                                                                    | 5       |
|                              | (c) Explain how missing data were addressed                                                                                                                                                                                                                                                               | n/a                                                                                                                                                                                                                                                                                                                                                                                                                                                                    |         |
|                              | (d) <i>Cohort study</i> —If applicable, explain how loss to follow-up was addressed<br><i>Case-control study</i> —If applicable, explain how matching of cases and controls was addressed<br><i>Cross-sectional study</i> —If applicable, describe analytical methods taking account of sampling strategy | n/a                                                                                                                                                                                                                                                                                                                                                                                                                                                                    |         |
|                              | (e) Describe any sensitivity analyses                                                                                                                                                                                                                                                                     | n/a                                                                                                                                                                                                                                                                                                                                                                                                                                                                    |         |

Continued on next page

| <b>Results</b>           |     |                                                                                                                                                                                                              |                |
|--------------------------|-----|--------------------------------------------------------------------------------------------------------------------------------------------------------------------------------------------------------------|----------------|
| Participants             | 13* | (a) Report numbers of individuals at each stage of study—eg numbers potentially eligible, examined for eligibility, confirmed eligible, included in the study, completing follow-up, and analysed            | n/a            |
|                          |     | (b) Give reasons for non-participation at each stage                                                                                                                                                         | n/a            |
|                          |     | (c) Consider use of a flow diagram                                                                                                                                                                           | n/a            |
| Descriptive data         | 14* | (a) Give characteristics of study participants (eg demographic, clinical, social) and information on exposures and potential confounders                                                                     | 5-7            |
|                          |     | (b) Indicate number of participants with missing data for each variable of interest                                                                                                                          | n/a            |
|                          |     | (c) <i>Cohort study</i> —Summarise follow-up time (eg, average and total amount)                                                                                                                             | n/a            |
| Outcome data             | 15* | <i>Cohort study</i> —Report numbers of outcome events or summary measures over time                                                                                                                          | 6-7            |
|                          |     | <i>Case-control study</i> —Report numbers in each exposure category, or summary measures of exposure                                                                                                         |                |
|                          |     | <i>Cross-sectional study</i> —Report numbers of outcome events or summary measures                                                                                                                           |                |
| Main results             | 16  | (a) Give unadjusted estimates and, if applicable, confounder-adjusted estimates and their precision (eg, 95% confidence interval). Make clear which confounders were adjusted for and why they were included | 5-7, and 13-15 |
|                          |     | (b) Report category boundaries when continuous variables were categorized                                                                                                                                    |                |
|                          |     | (c) If relevant, consider translating estimates of relative risk into absolute risk for a meaningful time period                                                                                             |                |
| Other analyses           | 17  | Report other analyses done—eg analyses of subgroups and interactions, and sensitivity analyses                                                                                                               |                |
| <b>Discussion</b>        |     |                                                                                                                                                                                                              |                |
| Key results              | 18  | Summarise key results with reference to study objectives                                                                                                                                                     | 7              |
| Limitations              | 19  | Discuss limitations of the study, taking into account sources of potential bias or imprecision. Discuss both direction and magnitude of any potential bias                                                   | 8              |
| Interpretation           | 20  | Give a cautious overall interpretation of results considering objectives, limitations, multiplicity of analyses, results from similar studies, and other relevant evidence                                   | 7-8            |
| Generalisability         | 21  | Discuss the generalisability (external validity) of the study results                                                                                                                                        | 8              |
| <b>Other information</b> |     |                                                                                                                                                                                                              |                |
| Funding                  | 22  | Give the source of funding and the role of the funders for the present study and, if applicable, for the original study on which the present article is based                                                | 9              |

\*Give information separately for cases and controls in case-control studies and, if applicable, for exposed and unexposed groups in cohort and cross-sectional studies.

**Note:** An Explanation and Elaboration article discusses each checklist item and gives methodological background and published examples of transparent reporting. The STROBE checklist is best used in conjunction with this article (freely available on the Web sites of PLoS Medicine at <http://www.plosmedicine.org/>, Annals of Internal Medicine at <http://www.annals.org/>, and Epidemiology at <http://www.epidem.com/>). Information on the STROBE Initiative is available at [www.strobe-statement.org](http://www.strobe-statement.org).



# BMJ Open

## A Swedish nationwide time series analysis of influenza and suicide deaths from 1910 to 1978

|                                 |                                                                                                                                                                                                                                                                                                                                                                                                                                                                                             |
|---------------------------------|---------------------------------------------------------------------------------------------------------------------------------------------------------------------------------------------------------------------------------------------------------------------------------------------------------------------------------------------------------------------------------------------------------------------------------------------------------------------------------------------|
| Journal:                        | <i>BMJ Open</i>                                                                                                                                                                                                                                                                                                                                                                                                                                                                             |
| Manuscript ID                   | bmjopen-2021-049302.R2                                                                                                                                                                                                                                                                                                                                                                                                                                                                      |
| Article Type:                   | Original research                                                                                                                                                                                                                                                                                                                                                                                                                                                                           |
| Date Submitted by the Author:   | 17-Jun-2021                                                                                                                                                                                                                                                                                                                                                                                                                                                                                 |
| Complete List of Authors:       | Rück, Christian; Karolinska Institutet, Department of Clinical Neuroscience, Center for Psychiatry Research<br>Mataix-Cols, David; Karolinska Institutet, Department of Clinical Neuroscience, Center for Psychiatry Research<br>Malki, Kinda; Karolinska Institutet<br>Adler, Mats; Karolinska Institutet<br>Flygare, Oskar; Karolinska Institutet<br>Runeson, Bo; Karolinska Institutet, Clin Neuroscience<br>Sidorchuk, Anna; Karolinska Institutet Department of Clinical Neuroscience, |
| <b>Primary Subject Heading</b>: | Mental health                                                                                                                                                                                                                                                                                                                                                                                                                                                                               |
| Secondary Subject Heading:      | Epidemiology, Public health                                                                                                                                                                                                                                                                                                                                                                                                                                                                 |
| Keywords:                       | MENTAL HEALTH, COVID-19, Suicide & self-harm < PSYCHIATRY                                                                                                                                                                                                                                                                                                                                                                                                                                   |
|                                 |                                                                                                                                                                                                                                                                                                                                                                                                                                                                                             |

SCHOLARONE™  
Manuscripts



I, the Submitting Author has the right to grant and does grant on behalf of all authors of the Work (as defined in the below author licence), an exclusive licence and/or a non-exclusive licence for contributions from authors who are: i) UK Crown employees; ii) where BMJ has agreed a CC-BY licence shall apply, and/or iii) in accordance with the terms applicable for US Federal Government officers or employees acting as part of their official duties; on a worldwide, perpetual, irrevocable, royalty-free basis to BMJ Publishing Group Ltd ("BMJ") its licensees and where the relevant Journal is co-owned by BMJ to the co-owners of the Journal, to publish the Work in this journal and any other BMJ products and to exploit all rights, as set out in our [licence](#).

The Submitting Author accepts and understands that any supply made under these terms is made by BMJ to the Submitting Author unless you are acting as an employee on behalf of your employer or a postgraduate student of an affiliated institution which is paying any applicable article publishing charge ("APC") for Open Access articles. Where the Submitting Author wishes to make the Work available on an Open Access basis (and intends to pay the relevant APC), the terms of reuse of such Open Access shall be governed by a Creative Commons licence – details of these licences and which [Creative Commons](#) licence will apply to this Work are set out in our licence referred to above.

Other than as permitted in any relevant BMJ Author's Self Archiving Policies, I confirm this Work has not been accepted for publication elsewhere, is not being considered for publication elsewhere and does not duplicate material already published. I confirm all authors consent to publication of this Work and authorise the granting of this licence.

Word count  
Abstract: 231  
Body: 3532  
Tables: 3  
Figures: 2

1  
2  
3  
4  
5  
6  
7  
8  
9  
10  
11  
12  
13 **A Swedish nationwide time series analysis of influenza and suicide deaths from 1910 to**  
14 **1978**  
15  
16

17  
18 Christian Rück, M.D.<sup>1</sup>, David Mataix-Cols, Ph.D.<sup>1</sup>, Kinda Malki, M.D. <sup>1</sup>, Mats Adler, M.D. <sup>1</sup>,  
19 Oskar Flygare, M.Sc.<sup>1</sup>, Bo Runeson, M.D. <sup>1</sup>, Anna Sidorchuk, M.D.<sup>1</sup>  
20  
21  
22  
23  
24  
25

26 Corresponding author:

27 Professor Christian Rück, M46, Karolinska University Hospital Huddinge, SE-14186  
28 Huddinge, Sweden E-mail: [Christian.ruck@ki.se](mailto:Christian.ruck@ki.se), telephone +46704843392.  
29  
30  
31

32 Affiliation:

33 1. Centre for Psychiatry Research, Department of Clinical Neuroscience,  
34 Karolinska Institutet, & Stockholm Health Care Services, Region Stockholm, Sweden  
35  
36  
37  
38  
39  
40  
41  
42  
43  
44  
45  
46  
47  
48  
49  
50  
51  
52  
53  
54  
55  
56  
57  
58  
59  
60

## ABSTRACT

**Objectives:** There is concern that the COVID-19 pandemic will be associated with an increase in suicides, but evidence supporting a link between pandemics and suicide is limited. Using data from the three influenza pandemics of the 20<sup>th</sup> century, we aimed to investigate whether an association exists between influenza deaths and suicide deaths.

**Design:** Time series analysis.

**Setting:** Sweden.

**Participants:** Deaths from influenza and suicides extracted from the Statistical Yearbook of Sweden for 1910-1978, covering three pandemics (the Spanish flu, the Asian flu and the Hong-Kong flu).

**Main outcome measures:** Annual suicide rates in Sweden among the whole population, men, and women. Non-linear autoregressive distributed lag (NARDL) models was implemented to explore if there is a short-term and/or long-term relationship of increases and decreases in influenza death rates with suicide rates during 1910-1978.

**Results:** Between 1910-1978, there was no evidence of either short-term or long-term significant associations between influenza death rates and changes in suicides ( $\beta$ -coefficients of 0.00002,  $P=0.931$  and  $\beta=0.00103$ ,  $P=0.764$  for short-term relationship of increases and decreases in influenza death rates, respectively, with suicide rates, and  $\beta=-0.0002$ ,  $P=0.998$  and  $\beta=0.00211$ ,  $P=0.962$  for long-term relationship of increases and decreases in influenza death rates, respectively, with suicide rates). The same pattern emerged in separate analyses for men and women.

**Conclusions:** We found no evidence of short or long-term association between influenza death rates and suicide death rates across three 20<sup>th</sup> century pandemics.

**Key words:** pandemics, suicide, mental health, Spanish flu, Asian influenza, Hong-Kong influenza, COVID-19

### Strengths and limitations of this study

- To our knowledge, this was the first study to investigate the association between influenza deaths and suicide across several pandemics.
- The large amount of nationwide data on influenza and suicide death rates covering 1910-1978 is a strength of the study.
- To guard against effects of changes in the recording of causes of death, we created a series of dummy variables for each corresponding period but no significant effects were found.
- No historical data with higher temporal resolution than yearly data could affect the results if the time sequence of association between changes in influenza death and suicide differ from the chosen time interval.

## INTRODUCTION

Various international surveys have documented a negative impact of the COVID-19 pandemic on the population's mental health, with increased levels of psychological stress, psychiatric symptoms, insomnia, and alcohol consumption.[1–4] Whether these acute impacts will persist long term is currently unknown. The Royal College of Psychiatrists in the UK and the World Health Organization as well as the International Academy of Suicide Research have raised concerns of a possible increase in suicide rates.[5–7] Such concerns originate from a combination of known risk factors for suicide, including the impacts of social distancing and disconnectedness, an economic downturn, the decreased access to mental health services, and increased access to lethal means exemplified by an increase in gun purchases in the US.[8] For example, a study of the economic recession in USA 2007-2009 found that for every percentage point increase in the unemployment rate, there was about a 1.6 per cent increase in the suicide rate.[9,10] These findings have been questioned. A study using an interrupted time-series analysis taking e.g. seasonality and long-term trends into account, found little evidence that the recession resulted in net excess suicides across all age and gender groups.[11] However, there was some evidence of excess suicides among men aged 65 and above 65 and young women. Another study failed to find an increase in suicide rates in Sweden during the two most recent economic recessions.[12]

While the concern is widespread, there is currently little evidence to support a clear association between the ongoing COVID-19 outbreak and an increased risk of suicide. Data from the US Centers for Disease Control and Prevention shows that suicide decreased in 2020, compared to the preceding year.[13] Data from April to October 2020 from the UK did not show an increase of suicides.[14] The first months of the COVID-19 pandemic in 21 countries was studied by Pirkis and colleagues and overall there was little support for an increase in suicides.[15] Other reports highlight that the outcomes differ and that certain minorities may be at higher risk.[16]

Historic US mortality data from the largest pandemic in the 20<sup>th</sup> century, the Spanish flu, showed that the Spanish flu was associated with an increase in suicides but those effects may have been mitigated by a decline in alcohol consumption.[17] Suicide during the same pandemic in Taiwan, where the Japanese Colonial Government implemented physical distancing, school closings and prohibited religious activities, was studied in a paper by Chang and colleagues.[18] They reported a small and shortlived increase in suicides in the second wave of the pandemic. A study of the impact of social distancing measures on suicide in 1918 in the US was studied and showed that increasing social distancing was associated with suicide rates independent of the influenza mortality rate.[19] In Sweden, there were measures in place in Sweden during the Spanish Flu to minimize the spread of the disease, such as school closings, and public gatherings, cinemas and religious meetings were temporarily stopped in some places.[20]

The outbreak of the Severe Acute Respiratory Syndrome (SARS) epidemic in 2003 in Hong Kong was according to two studies associated with an increase of suicide in the population above the age of 65.[21,22] In the first of these two reports, the association was only statistically significant in elderly women.[21] Another study of suicides during SARS suggested that disconnectedness and fear of contracting SARS were more prevalent in older

1  
2  
3 adult SARS-related suicide victims than non-SARS-related suicide victims. However, this  
4 was based on a small number of suicides.[23] To summarise, at present, our understanding of  
5 the effects of pandemics on suicide rates is very limited.  
6

7  
8 The availability of high-quality historical data on mortality due to influenza and suicide in  
9 Sweden provides a unique opportunity to examine this important question. While we at  
10 present have some short-term data on the rates of suicide during the COVID-19 pandemic, a  
11 better understanding of what may be the outcome in the longer run would be valuable. Using  
12 historical data from the three major influenza pandemics of the 20<sup>th</sup> century, we aimed to  
13 formally investigate whether an association between influenza deaths and suicide deaths  
14 exists. We hypothesize that such association, if any, would likely be weak. Given the  
15 substantial sex differences in suicidal behaviour and the studies suggesting sex-specific  
16 effects during SARS,[21] we additionally report on associations separately in men and  
17 women.  
18  
19  
20  
21

## 22 **METHODS**

### 23 **Data acquisition**

24 Annual data on influenza death rates and suicide rates were estimated based on information  
25 from the Statistical Yearbook of Sweden from 1910-1978.[24] Over this period, Sweden  
26 experienced three influenza pandemics which occurred during different socio-political  
27 contexts, namely the Spanish flu (1918-1920, with the first case appearing in Sweden in June  
28 1918), the Asian flu (1957-1958, being first documented in August 1957), and the Hong Kong  
29 flu (1968-1969, starting in the autumn of 1968).[20] The yearbooks were produced by  
30 Statistics Sweden, a governmental agency responsible for the official statistics in Sweden,  
31 with a history of population statistics going back to the 18<sup>th</sup> century.[24] For each year from  
32 1910 to 1978, we retrieved information on the total population of Sweden, the number of  
33 deaths by influenza (if death cause was indicated as “influenza”) and the number of suicides  
34 (if death cause was indicated as “suicide”), as well as the corresponding data separately for  
35 men and women. Since yearbooks reported data retrospectively for several years prior to the  
36 year each book was published, we checked the correctness of retrieved data by comparing  
37 yearbooks with overlapping reporting periods. We constructed influenza mortality rates and  
38 suicide rates per 100 000 inhabitants for each year by dividing the number of deaths by  
39 influenza and, separately, suicide, by the total number of individuals registered in Sweden in a  
40 corresponding year and then multiplying by 100 000. The corresponding rates for men and  
41 women were constructed likewise. In addition, we collected information on the changes in  
42 registration of deaths in Sweden that included the cause of death classification based on the  
43 Bertillon criteria (prior to 1931), the new classification introduced in cooperation with  
44 statistical authorities from other Nordic countries (1931-1950), the International Classification  
45 of Diseases (ICD) Sixth Revision (ICD-6; 1951-1957), ICD-7 (1958-1968), and ICD-8 (1969-  
46 1978).[25] To capture a potential effect of changes in classification, we created a series of  
47 dummy variables for each corresponding period, but these were only kept in the models if  
48 statistically significant.  
49  
50  
51  
52  
53  
54

55 The study protocol was not preregistered. The full dataset used in the analysis of historical  
56 data (1910-1978) and the STATA code are available in the online Supplement  
57 **(Supplementary eTable 1 and Supplementary material)**.  
58  
59

### 60 **Statistical Analyses**

1  
2  
3 We used the historical data 1910-1978 that includes three pandemics and focused on  
4 exploring a possible asymmetric short-term effect of influenza death rates on suicide (i.e.,  
5 immediate or instantaneous effect) and long-term effect (i.e., if the relationship of exposure  
6 and outcome has a lag-structure, or in other words, if the effect of exposure on outcome is  
7 distributed over a longer period of time) by applying non-linear autoregressive distributed lag  
8 (NARDL) models,[26] a technique initially introduced for research in economics. NARDL  
9 models split the exposure in partial sum of positive changes (i.e, increases in influenza death  
10 rates) and partial sum of negative changes (i.e., decreases in influenza death rates) and explore  
11 if an outcome responds differently (i.e., asymmetrically) to an increase and decrease in  
12 exposure variable.[26] In other words, NARDL models do not rely on an assumption of  
13 symmetrical effects, by which the association of the outcome with a unit of positive change in  
14 the exposure is expected to be equal in strength and opposite in direction to the association  
15 between the outcome and a unit of negative change in the exposure. We performed the  
16 modelling by using the *nardl* command in STATA.  
17  
18  
19

20  
21 Before the NARDL model is executed, it is important to test that the conditions for the  
22 modelling are fulfilled. It starts from testing whether or not the variables are stationary (i.e.,  
23 their means and variances are constant over time). The advantage of the NARDL modelling is  
24 that it can be used regardless of whether the variables are integrated of the order zero, which  
25 means that variables are stationary, integrated of the order one, which indicates non-  
26 stationarity, or mixed.[26] We examined the stationarity properties of the variables by using  
27 the Augmented Dickey–Fuller unit-root test (ADF) and Kwiatkowski-Phillips-Schmidt-Shin  
28 test for stationarity (KPSS) to explore the order of the integration for influenza death rates and  
29 suicide rates separately for the total population, men, and women. Previous studies on  
30 suicides hypothesized that various suicidogenic factors may interplay and reinforce each other  
31 and the logarithmic transformation of suicide time series was suggested.[27,28] We made  
32 such transformation by expressing suicide rates in natural logarithm. To select the optimal  
33 number of lags (i.e., how far in the past the dependency among measurements is examined) to  
34 be used in the NARDL for dependent and independent variables, we applied the *varsoc*  
35 command in STATA using the minimal values of Akaike Information Criterion, Schwarz’s  
36 Bayesian information criterion (SBIC), and the Hannan and Quinn information criterion  
37 information criteria. If information criteria indicated different lag orders, SBIC was used to  
38 select optimal lags. We applied the NARDL model to (i) estimate the coefficients and the  
39 corresponding 95% confidence intervals for short-term and long-term association of suicide  
40 rates with an increase and decrease in influenza death rates; (ii) explore if there is a long-term  
41 cointegration between exposure and outcome by using a bounds test (if variables are  
42 cointegrated, it means their positive and negative components do not drift far away from each  
43 other in the longer term); and (iii) obtain Wald test statistics that specifies whether or not  
44 short-term and/or long-term relation between the exposure and outcome is asymmetrical.  
45 Model diagnostic tests are described in the **Supplementary material**.  
46  
47  
48  
49

50  
51 The modelling was performed, first, for the whole period of 1910-1978, and then for the  
52 periods of 1918-1956 (from the beginning of the Spanish influenza pandemic to the year  
53 before the Asian influenza pandemic), and for 1957-1978 (from the beginning of Asian  
54 pandemic to the end of observation period; with this interval also covering the Hong Kong  
55 influenza pandemic).  
56

57 All statistical analyses were performed using STATA version 15.1 (StataCorp LLC, College  
58 Station, TX, USA).  
59  
60



### Patient and public involvement

Patients and members of the public were not directly involved as this study used publically available historical national mortality data.

## RESULTS

Over the period 1910-1978, influenza death rates fluctuated considerably in Sweden with the highest rates being observed during the Spanish flu (in 1918, 1919, and 1920, the rates were 470.93, 125.55, and 48.32 per 100 000 inhabitants, respectively) (**Figure 1**). In post-pandemic years, several noticeable peaks in influenza death rates appeared, with the ones in 1922, 1927, 1929, 1931, 1937, and 1941 being particularly high. In the following years, a considerable fluctuation in influenza mortality remained, although the rates during the periods of the Asian flu (in 1957 and 1958: 8.78 and 3.99 per 100 000 inhabitants, respectively) and the Hong Kong flu (in 1968 and 1969: 3.67 and 4.68 per 100 000 inhabitants, respectively) were lower than that in the first half of the century. The influenza death rates were very similar in men and women across the entire observation period (**Figure 2**).

[Figure 1 to be inserted here]

[Figure 2 to be inserted here]

During the same period, a total of 80 058 deaths due to suicide occurred in Sweden (60 713 in men and 19 345 in women). The average suicide rate across 1910-1978 was 16.79 per 100 000 inhabitants (standard deviation [SD] of 2.58), with corresponding rates for men and women as 25.85 (SD=3.37) and 7.91 (SD=2.26) per 100 000, respectively. There was a considerable fluctuation in the suicide rates over time (**Figure 1**). The initial decrease in suicide rates during 1913-1918, with the lowest rate of 9.97 per 100 000 in 1918, was followed by an increase with the highest peak of 22.15 per 100 000 reached in 1970, with a series of intermediate peaks.

Sex-specific suicide rates differed considerably with the rates among men being between twice to over four times higher than that in women (on average, 3.4-times higher) (**Figure 2**). Moreover, suicide rates in men exhibited a sharp dip in 1913-1918, which was first followed by an increase by 1921 and then continued to raise more gradually, although with several distinct peaks and, rarely, dips. Among women, an upward trend in suicide rate was present, although with less fluctuations than that in men.

In our analysis of 1910-1978 data, the first step with the use of the ADF and KPSS test statistics on variables' stationarity indicated that the logarithmically-transformed suicide rates were integrated of the order one (for all, and men and women separately); whereas the influenza death rates were integrated of the order zero (for all and for men and women separately) (**Supplementary eTable 2**). On this premise, we implemented the NARDL modelling. Dummy variables on changes in death registration did neither appear statistically significant nor affected any parameter estimates in the initial model, and thus were not included in the final models. As reported in **Table 1**, for the observation period of 1910-1978, there were no statistically significant associations (either short-term or long-term) between decreased or increased influenza death rates and suicide rates among the overall population and among men. The corresponding results for women indicated a possible short-term association whereby a decrease in influenza rates seemed to be associated with a borderline



1  
2  
3 decrease in suicides; however, the findings were not supported by the Wald test for  
4 asymmetry ( $[\text{Wald}_{\text{SR}}]$ , i.e. the null hypothesis of  $\text{Wald}_{\text{SR}}$  that an increase and decrease in  
5 influenza death rates would symmetrically affect suicide rates was not rejected). This suggests  
6 that association was likely due to the effect of other unobserved factors that may influence  
7 suicides in women. Full specification of the models is reported in **Supplementary eTable 3**.  
8 Full specification also includes the results of testing for long-term cointegration between  
9 influenza mortality and suicides (as reported by F-statistics for Pesaran/Shin/Smith bounds  
10 test  $[\text{F}_{\text{PSS}}]$ ). Long-term cointegration was not found as we were unable to reject the null  
11 hypothesis of no cointegration between variables (**Supplementary eTable 3**, see footnotes for  
12 details on bounds test for cointegration).  
13  
14

15  
16 The results of the additional analyses for the periods 1918-1956 and 1957-1978 also failed to  
17 provide clear evidence of association between changes in influenza mortality rates and suicide  
18 rates in either short-term or long-term. However, in the analysis among women, a long-term  
19 asymmetry was suggested in both periods (the Wald test for asymmetry in the long-term  
20  $[\text{Wald}_{\text{LR}}]$   $p=0.044$  and  $p<0.001$  in the analyses of 1918-1956 and 1957-1978, respectively)  
21 and a short-term asymmetry in the analysis of 1957-1978 ( $\text{Wald}_{\text{SR}}$  test  $p=0.019$ ) (**Tables 2** and  
22 **3**). We assume that these findings may again reflect the influence of unobserved confounders,  
23 as these results were not supported by other coefficients, which correspond to long- and short-  
24 term associations between increases and decreases in influenza deaths and suicides among  
25 women in 1918-1956 and 1957-1978 (**Tables 2** and **3**). It is important to mention that the  
26 results for 1957-1978 should be considered with caution since the analysis included time  
27 series with only 22 observations. Full specifications for the models used in the analyses of  
28 1918-1956 and 1957-1978 are reported in **Supplementary eTable 4** and **5**. No evidence of  
29 long-term cointegration between influenza and suicide rates were found in either period  
30 ( $\text{F}_{\text{PSS}}$  statistics does not reject the null hypothesis in the analyses of the whole population,  
31 men, and women; **Supplementary eTable 4** and **5**, see footnotes for details on bounds test for  
32 cointegration). Overall, the model diagnostics for all models for 1910-1978, 1918-1956, and  
33 1957-1978 time series support the validity of the results since, with very few exceptions, all  
34 diagnostic tests (for details see Supplementary materials) are insignificant indicating that there  
35 is no autocorrelation, heteroscedasticity, misspecification and non-normality. In addition, the  
36 tests of the cumulative sum of recursive residuals and their squares (CUSUM and CUSUMQ,  
37 respectively) for all models indicate stability and absence of structural breaks (for details see  
38 footnotes for **Table 1-3** and **Supplementary eTable 3-5**).  
39  
40  
41  
42  
43  
44  
45  
46

## 47 **DISCUSSION**

48 This study used publicly available Swedish national data from 1910 to 1978 to shed light on  
49 the potential association between influenza-related deaths and over 80 000 deaths by suicide  
50 across the three 20<sup>th</sup> century pandemics. To our knowledge, this is the first study of influenza  
51 death and suicide that analyses data from several influenza pandemics. The full modelling  
52 provided no clear evidence of either a short-term or a long-term relationship between changes  
53 in influenza death rates and changes in suicide rates. The year with the highest number of  
54 influenza-related deaths by far, 1918, had the lowest number of suicides in the whole time  
55 series.  
56

### 57 **The findings in context**

1  
2  
3 International historical data on pandemics and suicide are very scarce. A report from the US  
4 focusing on the years 1910-1920 and using monthly data suggested a possible association  
5 between influenza deaths and suicide but because the data did not go beyond the last year of  
6 that pandemic, it does not inform us about any longer term effects.[17] Strengths of that study  
7 included the use of monthly data and the use of time series analysis, rather than just  
8 comparing suicide rates before and after the pandemic. Chang et al studied suicides during the  
9 same pandemic in Taiwan, not using a time series analysis but also using monthly data from  
10 1918-20 and found an increase during the few months of the second wave of the pandemic but  
11 that the effect was short-lived. As our study used yearly and not monthly data, it could not  
12 confirm or disconfirm the findings of the Taiwanese study. Our study expands and improves  
13 upon previous investigations because it allowed us to examine the long-term associations  
14 between influenza and suicide deaths. A study focusing on SARS and suicide found some  
15 evidence of sex-specific effects in the short-term.[21] As suicide rates varied considerably in  
16 the years preceding SARS in Hong Kong, it is difficult to be certain that SARS, and not other  
17 contributing factors, was causally associated with an increase in suicides. In the present study,  
18 which uniquely spanned over several decades, we found that while suicide was consistently  
19 more prevalent among men throughout the study period, there were no sex-specific  
20 associations to influenza death.  
21  
22  
23  
24  
25

### 26 **Meaning of the study**

27 What do these results mean for our understanding of the short- and long-term consequences of  
28 influenza pandemics? Our results do not support the belief that global pandemics necessarily  
29 lead to a substantial increase in suicides. There are many factors associated with a global  
30 pandemic that may potentially increase suicide risk in the population, but these may be offset  
31 by other protective factors that should not be overlooked. A shared sense of belonging and  
32 focus, social connectedness and a “pulling together effect” may be one such factor.[1,29] We  
33 acknowledge that these historical findings may not be directly applicable to the current  
34 COVID-19 pandemic because there are several important differences between the previous  
35 and current pandemics, such as globalisation, mortality rates, a different socio-political  
36 context and the impact of social media, to name a few.  
37  
38  
39

### 40 **Strengths and limitations**

41 The major strengths of this study were the use of a large amount of historical national data  
42 across three 20<sup>th</sup> century pandemics and state of the art time-series analyses. A limitation is  
43 that all data comes from a single country and thus caution is needed when generalising  
44 the study findings to countries with different level of development of clinical and preventive  
45 medicine, social support, etc. The study used the Swedish historical public death records and  
46 we had no means of verifying the causes of death. The coverage and precision of these  
47 records is likely to have improved over time for both variables. To guard against effects of  
48 changes in the recording of causes of death, we created a series of dummy variables for each  
49 corresponding period but no significant effects of those were found. If there were some other  
50 time-varying factors that could affect the coverage and precision of death records, apart from  
51 the official changes in registration system, this might have biased our results, in particular if  
52 such factors differentially affected the quality of recording deaths due to influenza and  
53 suicide. As we did not have access to data with higher temporal resolution than yearly data,  
54 that could affect our results if the time sequence of association between changes in influenza  
55 death and suicide differ from the chosen time interval. A multitude of factors may vary that  
56 impact the resilience of the society with regards to the effect of a pandemic. Such factors may  
57 also vary over time and place. However, the fact that we observed no clear associations  
58 between influenza and suicide deaths across pandemics, which challenged society with  
59  
60

1  
2  
3 various degrees of e.g. economic effects and health care supply issues, does support the  
4 stability of our findings.  
5

## 6 **Conclusion**

7 In this national analysis of historical data spanning across three 20<sup>th</sup> century pandemics, we  
8 found no evidence of a short- or long-term association between influenza death rates and  
9 suicide rates. The results challenge the notion that an increase of suicides follows as a certain  
10 consequence of a pandemic. Future research on the effect of the current COVID-19 pandemic  
11 should explore the possibility of differential short- and long-term effects on suicide rates in  
12 different subgroups of the population.  
13  
14  
15  
16  
17

## 18 **Footnotes**

19  
20 Contributor statement: CR and AS have full access to all the data in this study and take full  
21 responsibility as guarantors for the integrity of the data and the accuracy of the data analysis.  
22 CR, DMC, and AS conceived and designed the study. CR, KM, MA, and AS performed data  
23 collection. AS undertook the statistical analysis. CR, DMC, and AS drafted the manuscript.  
24 CR, AS, DMC, KM, MA, BR and OF provided critical input to the analyses, interpreted the  
25 data, and revised the manuscript critically. The corresponding author confirms that all listed  
26 authors meet authorship criteria and that no others meeting the criteria have been omitted.  
27  
28

29 Funding: Karolinska Institutet and Region Stockholm, which provide salary for the authors,  
30 had no involvement in the study design; collection, analysis, and interpretation of data; in the  
31 writing of the report; or in the decision to submit the paper for publication.  
32  
33

34 Competing interests: All authors have completed the ICMJE uniform disclosure form  
35 at [www.icmje.org/coi\\_disclosure.pdf](http://www.icmje.org/coi_disclosure.pdf) and declare: no grant support from any organisation for  
36 the submitted work, salaries of the author were provided from Region Stockholm and  
37 Karolinska Institutet but not specifically for this project; no financial relationships with any  
38 organisations that might have an interest in the submitted work in the previous three years; no  
39 other relationships or activities that could appear to have influenced the submitted work.  
40  
41  
42

43 Data sharing: The full dataset (numbers of deaths by influenza and suicide and total  
44 population for 1910-1978) is published as supplementary material (eTable 1).  
45  
46

47 Dissemination to participants and patient organisations: since only aggregated mortality data  
48 was used, dissemination to participants is not possible. We intend to disseminate the results to  
49 the general public via media and the research group's webpage.  
50  
51

52 Transparency declaration: The lead author affirms that this manuscript is an honest, accurate,  
53 and transparent account of the study being reported; that no important aspects of the study  
54 have been omitted; and that any discrepancies from the study as planned have been explained.  
55  
56

57 Ethical approval: Since only data already available in the public domain were used, ethical  
58 approval was not necessary.  
59  
60

## References

- 1 Reger MA, Stanley IH, Joiner TE. Suicide Mortality and Coronavirus Disease 2019—A Perfect Storm? *JAMA Psychiatry* Published Online First: 10 April 2020. doi:10.1001/jamapsychiatry.2020.1060
- 2 Dutheil F, Mondillon L, Navel V. PTSD as the second tsunami of the SARS-Cov-2 pandemic. *Psychol Med* 2020;:1–2. doi:10.1017/S0033291720001336
- 3 O'Connor RC, Wetherall K, Cleare S, *et al.* Mental health and well-being during the COVID-19 pandemic: longitudinal analyses of adults in the UK COVID-19 Mental Health & Wellbeing study. *Br J Psychiatry* 2020;:1–8. doi:10.1192/bjp.2020.212
- 4 Pierce M, Hope H, Ford T, *et al.* Mental health before and during the COVID-19 pandemic: a longitudinal probability sample survey of the UK population. *Lancet Psychiatry* 2020;7:883–92. doi:10.1016/S2215-0366(20)30308-4
- 5 WHO. Substantial investment needed to avert mental health crisis. <https://www.who.int/news-room/detail/14-05-2020-substantial-investment-needed-to-avert-mental-health-crisis> (accessed 1 Jun 2020).
- 6 Zalsman G, Stanley B, Szanto K, *et al.* Suicide in the Time of COVID-19: Review and Recommendations. *Arch Suicide Res* 2020;:1–6. doi:10.1080/13811118.2020.1830242
- 7 Psychiatrists see alarming rise in patients needing urgent and emergency care and forecast a 'tsunami' of mental illness. [www.rcpsych.ac.uk](http://www.rcpsych.ac.uk). <https://www.rcpsych.ac.uk/news-and-features/latest-news/detail/2020/05/15/psychiatrists-see-alarming-rise-in-patients-needing-urgent-and-emergency-care> (accessed 1 Jun 2020).
- 8 Moutier C. Suicide Prevention in the COVID-19 Era: Transforming Threat Into Opportunity. *JAMA Psychiatry* Published Online First: 16 October 2020. doi:10.1001/jamapsychiatry.2020.3746
- 9 Stuckler D, Basu S, Suhrcke M, *et al.* The public health effect of economic crises and alternative policy responses in Europe: an empirical analysis. *The Lancet* 2009;374:315–23. doi:10.1016/S0140-6736(09)61124-7
- 10 Phillips JA, Nugent CN. Suicide and the Great Recession of 2007–2009: The role of economic factors in the 50 U.S. states. *Soc Sci Med* 2014;116:22–31. doi:10.1016/j.socscimed.2014.06.015
- 11 Harper S, Bruckner TA. Did the Great Recession increase suicides in the USA? Evidence from an interrupted time-series analysis. *Ann Epidemiol* 2017;27:409–414.e6. doi:10.1016/j.annepidem.2017.05.017
- 12 Reeves A, McKee M, Stuckler D. Economic suicides in the Great Recession in Europe and North America. *Br J Psychiatry* 2014;205:246–7. doi:10.1192/bjp.bp.114.144766
- 13 Ahmad FB, Anderson RN. The Leading Causes of Death in the US for 2020. *JAMA* Published Online First: 31 March 2021. doi:10.1001/jama.2021.5469
- 14 Appleby L, Richards N, Ibrahim S, *et al.* Suicide in England in the COVID-19 pandemic: Early observational data from real time surveillance. *Lancet Reg Health - Eur* 2021;:100110. doi:10.1016/j.lanepe.2021.100110
- 15 Pirkis J, John A, Shin S, *et al.* Suicide trends in the early months of the COVID-19 pandemic: an interrupted time-series analysis of preliminary data from 21 countries. *Lancet Psychiatry* Published Online First: 13 April 2021. doi:10.1016/S2215-0366(21)00091-2

- 1  
2  
3 16 Mitchell TO, Li L. State-Level Data on Suicide Mortality During COVID-19  
4 Quarantine: Early Evidence of a Disproportionate Impact on Racial Minorities. *Psychiatry*  
5 *Res* 2021;**295**:113629. doi:10.1016/j.psychres.2020.113629  
6  
7 17 Wasserman IM. The impact of epidemic, war, prohibition and media on suicide:  
8 United States, 1910-1920. *Suicide Life Threat Behav* 1992;**22**:240–54.  
9  
10 18 Chang Y-H, Chang S-S, Hsu C-Y, *et al.* Impact of Pandemic on Suicide: Excess  
11 Suicides in Taiwan During the 1918–1920 Influenza Pandemic. *J Clin Psychiatry* 2020;**81**.  
12 doi:10.4088/JCP.20113454  
13  
14 19 Stack S, Rockett IRH. Social distancing predicts suicide rates: Analysis of the 1918 flu  
15 pandemic in 43 large cities, research note. *Suicide Life Threat Behav* 2021;:sltb.12729.  
16 doi:10.1111/sltb.12729  
17  
18 20 Holmberg M. The ghost of pandemics past: revisiting two centuries of influenza in  
19 Sweden. *Med Humanit* 2017;**43**:141–7. doi:10.1136/medhum-2016-011023  
20  
21 21 Chan SMS, Chiu FKH, Lam CWL, *et al.* Elderly suicide and the 2003 SARS epidemic  
22 in Hong Kong. *Int J Geriatr Psychiatry* 2006;**21**:113–8. doi:10.1002/gps.1432  
23  
24 22 Cheung YT, Chau PH, Yip PSF. A revisit on older adults suicides and Severe Acute  
25 Respiratory Syndrome (SARS) epidemic in Hong Kong. *Int J Geriatr Psychiatry*  
26 2008;**23**:1231–8. doi:10.1002/gps.2056  
27  
28 23 Yip PSF, Cheung YT, Chau PH, *et al.* The Impact of Epidemic Outbreak: The Case of  
29 Severe Acute Respiratory Syndrome (SARS) and Suicide Among Older Adults in Hong  
30 Kong. *Crisis* 2010;**31**:86–92. doi:10.1027/0227-5910/a000015  
31  
32 24 *Statistics Sweden. Statistical yearbook of Sweden [Statistisk årsbok för Sverige 1914–*  
33 *2014]. <https://www.scb.se/hitta-statistik/aldre-statistik/innehall/statistisk-arsbok-1914-2014/>.*  
34  
35 25 The National Board of Health and Welfare. Cause of death statistics. History,  
36 production methods and reliability [Dödsorsaksstatistik. Historik, produktionsmetoder och  
37 tillförlitlighet]. [www.socialstyrelsen.se](http://www.socialstyrelsen.se). 2010.  
38  
39 26 Shin Y, Yu B, Greenwood-Nimmo M. Modelling Asymmetric Cointegration and  
40 Dynamic Multipliers in a Nonlinear ARDL Framework. In: Sickles RC, Horrace WC, eds.  
41 *Festschrift in Honor of Peter Schmidt: Econometric Methods and Applications*. New York: :  
42 Springer Science+Business Media 2014. 281–314.  
43  
44 27 Norstrom T, Stickley A, Shibuya K. The importance of alcoholic beverage type for  
45 suicide in Japan: a time-series analysis, 1963-2007. *Drug Alcohol Rev* 2012;**31**:251–6.  
46 doi:10.1111/j.1465-3362.2011.00300.x  
47  
48 28 Gunnell D, Lopatzidis A, Dorling D, *et al.* Suicide and unemployment in young  
49 people. Analysis of trends in England and Wales, 1921-1995. *Br J Psychiatry* 1999;**175**:263–  
50 70. doi:10.1192/bjp.175.3.263  
51  
52 29 Zortea TC, Brenna CTA, Joyce M, *et al.* The Impact of Infectious Disease-Related  
53 Public Health Emergencies on Suicide, Suicidal Behavior, and Suicidal Thoughts: A  
54 Systematic Review. *Crisis* 2020;:1–14. doi:10.1027/0227-5910/a000753  
55  
56  
57  
58  
59  
60



## Figure legends

**Figure 1. Annual suicide rate (scaled on the left arithmetic Y-axis) and influenza mortality (scaled on the right logarithmic Y-axis) in Sweden in 1910-1978 per 100 000 inhabitants.** *Note:* To ease visualisation, influenza death rates are reported on the logarithmic scale, while for the analysis, the logarithmic transformation was performed for suicide rates. Grey areas denote the time periods corresponding to the Spanish influenza pandemic ('S.flu', 1918-1920), the Asian influenza pandemic ('A.flu', 1957-1958), and the Hong Kong influenza pandemic ('HK.flu', 1968-1969) in Sweden.

**Figure 2. Sex-specific annual suicide rate (scaled on the left arithmetic Y-axis) and influenza mortality (scaled on the right logarithmic Y-axis) in Sweden in 1910-1978 per 100 000 inhabitants of corresponding sex.** *Note:* To ease visualisation, influenza death rates are reported on the logarithmic scale, while for the analysis, the logarithmic transformation was performed for suicide rates. Grey areas denote the time periods corresponding to the Spanish influenza pandemic ('S.flu', 1918-1920), the Asian influenza pandemic ('A.flu', 1957-1958), and the Hong Kong influenza pandemic ('HK.flu', 1968-1969) in Sweden.

**Table 1. Short-term and long-term relationship of suicide rates with positive and negative changes in influenza death rates among the whole population, men, and women in 1910-1978 in Sweden**

|                                      | Whole population                 |         | Men                               |         | Women                             |         |
|--------------------------------------|----------------------------------|---------|-----------------------------------|---------|-----------------------------------|---------|
|                                      | Coeff. (95% CI)                  | p-value | Coeff. (95% CI)                   | p-value | Coeff. (95% CI)                   | p-value |
| <b>Short-term coefficients</b>       |                                  |         |                                   |         |                                   |         |
| Influenza +                          | 0.00002<br>(-0.00036 to 0.00039) | 0.931   | 0.00004<br>(-0.00034 to 0.00041)  | 0.854   | -0.00007<br>(-0.00056 to 0.00041) | 0.760   |
| Influenza –                          | 0.00103<br>(-0.00579 to 0.00785) | 0.764   | -0.00192<br>(-0.01005 to 0.00621) | 0.638   | 0.00780<br>(0.00015 to 0.01544)   | 0.046   |
| <b>Long-term coefficients</b>        |                                  |         |                                   |         |                                   |         |
| Influenza +                          | -0.00012                         | 0.998   | -0.01314                          | 0.745   | 0.11254                           | 0.538   |
| Influenza –                          | 0.00211                          | 0.962   | 0.01443                           | 0.722   | -0.10789                          | 0.544   |
| <b>Model diagnostics</b>             |                                  |         |                                   |         |                                   |         |
| Q-test for autocorrelation, $\chi^2$ | 40.160                           | 0.125   | 35.260                            | 0.273   | 31.850                            | 0.424   |
| Heteroscedasticity, $\chi^2$         | 3.649                            | 0.056   | 5.439                             | 0.020   | 1.280                             | 0.258   |
| Normality, $\chi^2$                  | 2.826                            | 0.243   | 2.237                             | 0.327   | 2.372                             | 0.305   |
| RESET, F-statistics                  | 4.656                            | 0.006   | 5.473                             | 0.023   | 1.013                             | 0.394   |
| CUSUM                                | Stabl., no str. break            | NA      | Stabl., no str. break             | NA      | Stabl., no str. break             | NA      |
| CUSUMQ                               | Stabl.                           | NA      | Stabl.                            | NA      | Stabl.                            | NA      |
| Adj. R <sup>2</sup>                  | 0.257                            | NA      | 0.300                             | NA      | 0.374                             | NA      |
| Wald <sub>SR</sub> , F-statistics    | 0.054                            | 0.817   | 0.275                             | 0.602   | 1.062                             | 0.307   |
| Wald <sub>LR</sub> , F-statistics    | 1.206                            | 0.277   | 1.176                             | 0.283   | 0.771                             | 0.384   |

*Note:* Signs as “+” and “–” denote the exposure variable being partitioned in positive and negative changes, respectively. Wald test for asymmetry in the short-term (Wald<sub>SR</sub>) and long-term (Wald<sub>LR</sub>) has a null hypothesis of no cointegration. Q-test for autocorrelation reports the results of Portmanteau test for white noise. Heteroscedasticity is measured by Breusch-Pagan/Cook-Weisberg test. Normality is measured by Jarque-Bera test. RESET statistics refers to the regression specification error tests. CUSUM and CUSUMQ refer to the tests of the cumulative sum of recursive residuals and their squares, respectively. “NA” denotes that a certain test parameter was not applicable. Model diagnostics support the validity of the results since, with very few exceptions (RESET statistics for the whole population and men, and heteroscedasticity for men), all diagnostic tests are insignificant indicating that there is no autocorrelation, heteroscedasticity, misspecification and non-normality In



1  
2  
3  
4  
5  
6  
7  
8  
9  
10  
11  
12  
13  
14  
15  
16  
17  
18  
19  
20  
21  
22  
23  
24  
25  
26  
27  
28  
29  
30  
31  
32  
33  
34  
35  
36  
37  
38  
39  
40  
41  
42  
43  
44  
45  
46

addition, all CUSUM and CUSUMQ tests all models indicate stability and absence of structural breaks (“Stabl., no str. break” in the results of CUSUM indicates that the model was found stable and the null hypothesis of no structural break was not rejected [same applies to “Stabl.” as an output for CUSUMQ]).

For peer review only

**Table 2. Short-term and long-term relationship of suicide rates with positive and negative changes in influenza death rates among the whole population, men, and women in 1918-1956 in Sweden**

|                                      | Whole population                 |         | Men                               |         | Women                            |         |
|--------------------------------------|----------------------------------|---------|-----------------------------------|---------|----------------------------------|---------|
|                                      | Coeff. (95% CI)                  | p-value | Coeff. (95% CI)                   | p-value | Coeff. (95% CI)                  | p-value |
| <b>Short-term coefficients</b>       |                                  |         |                                   |         |                                  |         |
| Influenza +                          | 0.00002<br>(-0.00077 to 0.00082) | 0.955   | -0.00014<br>(-0.00102 to 0.00075) | 0.755   | 0.00098<br>(-0.00068 to 0.00263) | 0.237   |
| Influenza –                          | 0.00087<br>(-0.00643 to 0.00817) | 0.809   | -0.00132<br>(-0.01001 to 0.00741) | 0.760   | 0.00434<br>(-0.00595 to 0.01463) | 0.394   |
| <b>Long-term coefficients</b>        |                                  |         |                                   |         |                                  |         |
| Influenza +                          | 0.00011                          | 0.994   | -0.00490                          | 0.802   | 0.01403                          | 0.521   |
| Influenza –                          | 0.00103                          | 0.936   | 0.00548                           | 0.775   | -0.01098                         | 0.600   |
| <b>Model diagnostics</b>             |                                  |         |                                   |         |                                  |         |
| Q-test for autocorrelation, $\chi^2$ | 14.130                           | 0.658   | 9.674                             | 0.917   | 9.614                            | 0.919   |
| Heteroscedasticity, $\chi^2$         | 0.939                            | 0.333   | 0.768                             | 0.381   | 5.042                            | 0.025   |
| Normality, $\chi^2$                  | 0.420                            | 0.811   | 0.132                             | 0.936   | 2.383                            | 0.304   |
| RESET, F-statistics                  | 0.413                            | 0.745   | 0.764                             | 0.524   | 0.505                            | 0.683   |
| CUSUM                                | Stabl., no str. break            | NA      | Stabl., no str. break             | NA      | Stabl., no str. break            | NA      |
| CUSUMQ                               | Stabl.                           | NA      | Stabl.                            | NA      | Stabl.                           | NA      |
| Adj. R <sup>2</sup>                  | 0.309                            | NA      | 0.345                             | NA      | 0.432                            | NA      |
| Wald <sub>SR</sub> , F-statistics    | 0.056                            | 0.815   | 0.155                             | 0.697   | 0.183                            | 0.673   |
| Wald <sub>LR</sub> , F-statistics    | 1.555                            | 0.222   | 0.217                             | 0.645   | 4.479                            | 0.044   |

*Note:* Signs as “+” and “–” denote the exposure variable being partitioned in positive and negative changes, respectively. Wald test for asymmetry in the short-term (Wald<sub>SR</sub>) and long-term (Wald<sub>LR</sub>) has a null hypothesis of no cointegration. Q-test for autocorrelation reports the results of Portmanteau test for white noise. Heteroscedasticity is measured by Breusch-Pagan/Cook-Weisberg test. Normality is measured by Jarque-Bera test. RESET statistics refers to the regression specification error tests. CUSUM and CUSUMQ refer to the tests of the cumulative sum of recursive residuals and their squares, respectively. “NA” denotes that a certain test parameter was not applicable. Model diagnostics support the validity of the results since, with one exception (heteroscedasticity for women), all diagnostic tests are insignificant indicating that there is no autocorrelation, heteroscedasticity, misspecification and non-normality. In addition, all CUSUM and CUSUMQ tests all models indicate

1  
2  
3 stability and absence of structural breaks (“Stabl., no str. break” in the results of CUSUM indicates that the model was found stable and the null  
4 hypothesis of no structural break was not rejected [same applies to “Stabl.” as an output for CUSUMQ]).  
5  
6  
7  
8  
9  
10  
11  
12  
13  
14  
15  
16  
17  
18  
19  
20  
21  
22  
23  
24  
25  
26  
27  
28  
29  
30  
31  
32  
33  
34  
35  
36  
37  
38  
39  
40  
41  
42  
43  
44  
45  
46

For peer review only

**Table 3. Short-term and long-term relationship of suicide rates with positive and negative changes in influenza death rates among the whole population, men, and women in 1957-1978 in Sweden**

|                                      | Whole population                  |         | Men                               |         | Women                             |         |
|--------------------------------------|-----------------------------------|---------|-----------------------------------|---------|-----------------------------------|---------|
|                                      | Coeff. (95% CI)                   | p-value | Coeff. (95% CI)                   | p-value | Coeff. (95% CI)                   | p-value |
| <b>Short-term coefficients</b>       |                                   |         |                                   |         |                                   |         |
| Influenza +                          | -0.00964<br>(-0.02252 to 0.00324) | 0.883   | -0.00876<br>(-0.02738 to 0.00985) | 0.328   | -0.00976<br>(-0.02033 to 0.00081) | 0.068   |
| Influenza –                          | 0.00194<br>(-0.02614 to 0.03003)  | 0.130   | -0.01531<br>(-0.04658 to 0.01596) | 0.309   | 0.02155<br>(-0.00343 to 0.04653)  | 0.085   |
| <b>Long-term coefficients</b>        |                                   |         |                                   |         |                                   |         |
| Influenza +                          | 0.01255                           | 0.618   | -0.02659                          | 0.541   | 0.04091                           | 0.064   |
| Influenza –                          | -0.01033                          | 0.684   | 0.024538                          | 0.582   | -0.02870                          | 0.184   |
| <b>Model diagnostics</b>             |                                   |         |                                   |         |                                   |         |
| Q-test for autocorrelation, $\chi^2$ | 5.662                             | 0.773   | 3.790                             | 0.925   | 5.243                             | 0.813   |
| Heteroscedasticity, $\chi^2$         | 0.102                             | 0.750   | 0.155                             | 0.694   | 0.079                             | 0.778   |
| Normality, $\chi^2$                  | 1.569                             | 0.456   | 1.627                             | 0.443   | 1.237                             | 0.537   |
| RESET, F-statistics                  | 5.839                             | 0.014   | 3.348                             | 0.064   | 1.089                             | 0.398   |
| CUSUM                                | Stabl., no str. break             | NA      | Stabl., no str. break             | NA      | Stabl., no str. break             | NA      |
| CUSUMQ                               | Stabl.                            | NA      | Stabl.                            | NA      | Stabl.                            | NA      |
| Adj. R <sup>2</sup>                  | 0.246                             | NA      | 0.337                             | NA      | 0.371                             | NA      |
| Wald <sub>SR</sub> , F-statistics    | 2.903                             | 0.112   | 0.536                             | 0.477   | 7.132                             | 0.019   |
| Wald <sub>LR</sub> , F-statistics    | 0.922                             | 0.354   | 0.297                             | 0.595   | 26.74                             | <0.001  |

*Note:* Signs as “+” and “–” denote the exposure variable being partitioned in positive and negative changes, respectively. Wald test for asymmetry in the short-term (Wald<sub>SR</sub>) and long-term (Wald<sub>LR</sub>) has a null hypothesis of no cointegration. Q-test for autocorrelation reports the results of Portmanteau test for white noise. Heteroscedasticity is measured by Breusch-Pagan/Cook-Weisberg test. Normality is measured by Jarque-Bera test. RESET statistics refers to the regression specification error tests. CUSUM and CUSUMQ refer to the tests of the cumulative sum of recursive residuals and their squares, respectively. “NA” denotes that a certain test parameter was not applicable. Model diagnostics support the validity of the results since, with one exception (RESET statistics for the whole population), all diagnostic tests are insignificant indicating that there is no autocorrelation, heteroscedasticity, misspecification and non-normality. In addition, all CUSUM and CUSUMQ tests all

1  
2  
3  
4  
5  
6  
7  
8  
9  
10  
11  
12  
13  
14  
15  
16  
17  
18  
19  
20  
21  
22  
23  
24  
25  
26  
27  
28  
29  
30  
31  
32  
33  
34  
35  
36  
37  
38  
39  
40  
41  
42  
43  
44  
45  
46

models indicate stability and absence of structural breaks (“Stabl., no str. break” in the results of CUSUM indicates that the model was found stable and the null hypothesis of no structural break was not rejected [same applies to “Stabl.” as an output for CUSUMQ]).

For peer review only





1  
2  
3  
4  
5  
6  
7  
8  
9  
10  
11  
12  
13  
14  
15  
16  
17  
18  
19  
20  
21  
22  
23  
24  
25  
26  
27  
28  
29  
30  
31  
32  
33  
34  
35  
36  
37  
38  
39  
40  
41

## Supplementary material

**eTable 1. Original data on the number of deaths by influenza and suicide, and population size for total population, men, and women in 1910-1978, retrieved from the Statistical Yearbook of Sweden from 1910-1978**

| Year | Total population, N | Men, N  | Women, N | Deaths by influenza in total population, N | Deaths by influenza among men, N | Deaths by influenza among women, N | Deaths by suicide in total population, N | Deaths by suicide among men, N | Deaths by suicide among women, N |
|------|---------------------|---------|----------|--------------------------------------------|----------------------------------|------------------------------------|------------------------------------------|--------------------------------|----------------------------------|
| 1910 | 5522403             | 2698729 | 2823674  | 534                                        | 212                              | 322                                | 980                                      | 787                            | 193                              |
| 1911 | 5561799             | 2718638 | 2843161  | 312                                        | 134                              | 178                                | 974                                      | 790                            | 184                              |
| 1912 | 5604192             | 2740737 | 2863455  | 245                                        | 101                              | 144                                | 1019                                     | 836                            | 183                              |
| 1913 | 5638583             | 2756946 | 2881637  | 307                                        | 139                              | 168                                | 1006                                     | 820                            | 186                              |
| 1914 | 5679607             | 2777447 | 2902160  | 300                                        | 128                              | 172                                | 899                                      | 728                            | 171                              |
| 1915 | 5712740             | 2794552 | 2918188  | 1018                                       | 417                              | 601                                | 876                                      | 690                            | 186                              |
| 1916 | 5757566             | 2817950 | 2939616  | 314                                        | 143                              | 171                                | 757                                      | 586                            | 171                              |
| 1917 | 5800847             | 2841554 | 2959293  | 213                                        | 91                               | 122                                | 587                                      | 444                            | 143                              |
| 1918 | 5813850             | 2849205 | 2964645  | 27379                                      | 14245                            | 13134                              | 580                                      | 432                            | 148                              |
| 1919 | 5847037             | 2868395 | 2978642  | 7341                                       | 3667                             | 3674                               | 791                                      | 623                            | 168                              |
| 1920 | 5904489             | 2898256 | 3006233  | 2853                                       | 1596                             | 1257                               | 866                                      | 682                            | 184                              |
| 1921 | 5954316             | 2925988 | 3028328  | 479                                        | 241                              | 238                                | 910                                      | 721                            | 189                              |
| 1922 | 5987520             | 2944031 | 3043489  | 2235                                       | 918                              | 1317                               | 861                                      | 689                            | 172                              |
| 1923 | 6005759             | 2948508 | 3057251  | 224                                        | 106                              | 118                                | 851                                      | 689                            | 162                              |
| 1924 | 6036118             | 2964230 | 3071888  | 458                                        | 210                              | 248                                | 874                                      | 705                            | 169                              |
| 1925 | 6053562             | 2972554 | 3081008  | 669                                        | 280                              | 389                                | 817                                      | 646                            | 171                              |
| 1926 | 6074368             | 2982625 | 3091743  | 731                                        | 335                              | 396                                | 896                                      | 734                            | 162                              |
| 1927 | 6087923             | 2990205 | 3097718  | 2875                                       | 1277                             | 1598                               | 921                                      | 736                            | 185                              |
| 1928 | 6105190             | 2999562 | 3105628  | 444                                        | 207                              | 237                                | 855                                      | 703                            | 152                              |
| 1929 | 6120080             | 3007946 | 3112134  | 1345                                       | 573                              | 772                                | 944                                      | 761                            | 183                              |
| 1930 | 6142191             | 3020848 | 3121343  | 319                                        | 146                              | 173                                | 970                                      | 777                            | 193                              |
| 1931 | 6162446             | 3037064 | 3125382  | 2518                                       | 1025                             | 1493                               | 1015                                     | 804                            | 211                              |
| 1932 | 6190364             | 3053528 | 3136836  | 531                                        | 228                              | 303                                | 1094                                     | 910                            | 184                              |
| 1933 | 6211566             | 3066888 | 3144678  | 673                                        | 300                              | 373                                | 1063                                     | 852                            | 211                              |
| 1934 | 6233090             | 3079690 | 3153400  | 303                                        | 133                              | 170                                | 953                                      | 777                            | 176                              |
| 1935 | 6250506             | 3090451 | 3160055  | 685                                        | 316                              | 369                                | 969                                      | 768                            | 201                              |
| 1936 | 6266888             | 3100534 | 3166354  | 646                                        | 275                              | 371                                | 1045                                     | 825                            | 220                              |
| 1937 | 6284722             | 3111256 | 3173466  | 1173                                       | 522                              | 651                                | 978                                      | 747                            | 231                              |
| 1938 | 6310214             | 3125000 | 3185214  | 190                                        | 95                               | 95                                 | 996                                      | 779                            | 217                              |
| 1939 | 6341303             | 3142356 | 3198947  | 740                                        | 319                              | 421                                | 1022                                     | 800                            | 222                              |
| 1940 | 6371432             | 3160128 | 3211304  | 318                                        | 142                              | 176                                | 1086                                     | 858                            | 228                              |
| 1941 | 6406474             | 3180535 | 3225939  | 1082                                       | 434                              | 648                                | 1009                                     | 784                            | 225                              |
| 1942 | 6458200             | 3207756 | 3250444  | 96                                         | 43                               | 53                                 | 922                                      | 697                            | 225                              |
| 1943 | 6522827             | 3240631 | 3282196  | 204                                        | 95                               | 109                                | 982                                      | 719                            | 263                              |
| 1944 | 6597348             | 3279723 | 3317625  | 172                                        | 83                               | 89                                 | 858                                      | 671                            | 187                              |
| 1945 | 6673749             | 3321502 | 3352247  | 70                                         | 22                               | 48                                 | 1018                                     | 761                            | 257                              |
| 1946 | 6763685             | 3366694 | 3396991  | 291                                        | 111                              | 180                                | 1044                                     | 777                            | 267                              |
| 1947 | 6842046             | 3407577 | 3434469  | 316                                        | 133                              | 183                                | 1008                                     | 770                            | 238                              |



Supplementary material

|      |         |         |         |     |     |     |      |      |     |
|------|---------|---------|---------|-----|-----|-----|------|------|-----|
| 1948 | 6924888 | 3448122 | 3476766 | 25  | 8   | 17  | 1000 | 774  | 226 |
| 1949 | 6986181 | 3479079 | 3507102 | 54  | 20  | 34  | 1130 | 814  | 316 |
| 1950 | 7041829 | 3506442 | 3535387 | 80  | 44  | 36  | 1043 | 799  | 244 |
| 1951 | 7098740 | 3535736 | 3563004 | 522 | 208 | 314 | 1145 | 879  | 266 |
| 1952 | 7150606 | 3562475 | 3588131 | 112 | 45  | 67  | 1192 | 934  | 258 |
| 1953 | 7192316 | 3583598 | 3608718 | 347 | 145 | 202 | 1332 | 1008 | 324 |
| 1954 | 7234664 | 3605013 | 3629651 | 553 | 248 | 305 | 1225 | 918  | 307 |
| 1955 | 7290112 | 3633983 | 3656129 | 74  | 32  | 42  | 1293 | 983  | 310 |
| 1956 | 7338991 | 3659917 | 3679074 | 64  | 31  | 33  | 1474 | 1137 | 337 |
| 1957 | 7388611 | 3685654 | 3702957 | 649 | 327 | 322 | 1463 | 1145 | 318 |
| 1958 | 7429675 | 3706039 | 3723636 | 297 | 137 | 160 | 1282 | 959  | 323 |
| 1959 | 7462823 | 3722867 | 3739956 | 184 | 79  | 105 | 1350 | 1012 | 338 |
| 1960 | 7497967 | 3740119 | 3757848 | 801 | 378 | 423 | 1305 | 981  | 324 |
| 1961 | 7542028 | 3763040 | 3778988 | 98  | 47  | 51  | 1273 | 960  | 313 |
| 1962 | 7581148 | 3782252 | 3798896 | 154 | 71  | 83  | 1396 | 1043 | 353 |
| 1963 | 7627507 | 3805699 | 3821808 | 319 | 160 | 159 | 1406 | 1028 | 378 |
| 1964 | 7695200 | 3840897 | 3854303 | 39  | 12  | 27  | 1514 | 1096 | 418 |
| 1965 | 7772506 | 3882473 | 3890033 | 243 | 124 | 119 | 1459 | 1068 | 391 |
| 1966 | 7843088 | 3919170 | 3923918 | 157 | 68  | 89  | 1566 | 1145 | 421 |
| 1967 | 7892774 | 3942223 | 3950551 | 156 | 64  | 92  | 1702 | 1254 | 448 |
| 1968 | 7934996 | 3961414 | 3973582 | 291 | 108 | 183 | 1702 | 1240 | 462 |

review only

## Supplementary material

**Supplementary material. Model diagnostics**

We carried out several types of model diagnostics, including Portmanteau test for white noise to check autocorrelation in residuals, Breusch-Pagan/Cook-Weisberg test for heteroscedasticity, Jarque-Bera test on normality, and the regression specification error tests that indicates whether there is a misspecification in the model. We also performed tests for stability of the models by using the cumulative sum of recursive residuals and their squares to test whether there is a structural break due to changes in regression coefficients over time.

**Supplementary material. STATA codes for the non-linear autoregressive distributed lag (NARDL) modelling of association between influenza death rates and suicide rates**

```

clear
use "Z:\Influenza_deaths_suicides\ALL19101978.dta"

///// 1. DATA MANAGEMENT: generate and label variables to be used in the analyses

/// Labels for original variables (retrieved from the Statistical Yearbooks 1910-1978)

lab var year "Years 1910-1978"

lab var number_population_all "Total number of inhabitants (population size) in Sweden in corresponding year"
lab var number_population_men "Total number of male population in Sweden in corresponding year"
lab var number_population_women "Total number of female population in Sweden in corresponding year"

lab var number_influenza_all "Number of deaths from influenza in total population in corresponding year"
lab var number_influenza_men "Number of deaths from influenza among men in corresponding year"
lab var number_influenza_women "Number of deaths from influenza among women in corresponding year"

lab var number_suicide_all "Number of suicides in total population in corresponding year"
lab var number_suicide_men "Number of suicides among men in corresponding year"
lab var number_suicide_women "Number of suicides among women in corresponding year"

/// Calculation of annual influenza death rates and suicide rates per 100,000 for total population, men, and women

gen influenza_rates_all = (number_influenza_all/number_population_all)*100000
gen influenza_rates_men = (number_influenza_men/number_population_men)*100000
gen influenza_rates_women = (number_influenza_women/number_population_women)*100000

gen suicide_rates_all = (number_suicide_all/number_population_all)*100000
gen suicide_rates_men = (number_suicide_men/number_population_men)*100000
gen suicide_rates_women = (number_suicide_women/number_population_women)*100000

lab var influenza_rates_all "Influenza death rates for total population per 100,000, annual"
lab var influenza_rates_men "Influenza death rates among men per 100,000, annual"
lab var influenza_rates_women "Influenza death rates among women per 100,000, annual"

lab var suicide_rates_all "Suicide rates for total population per 100,000, annual"
lab var suicide_rates_men "Suicide rates among men per 100,000, annual"
lab var suicide_rates_women "Suicide rates among women per 100,000, annual"

/// Logarithmic transformation for suicide rates for total population, men, and women

```

## Supplementary material

```

1
2
3 gen ln_suicide_rates_all = ln(suicide_rates_all)
4 gen ln_suicide_rates_men = ln(suicide_rates_men)
5 gen ln_suicide_rates_women = ln(suicide_rates_women)
6
7 lab var ln_suicide_rates_all "Log-transformed suicide rates for total population per 100,000, annual"
8 lab var ln_suicide_rates_men "Log-transformed suicide rates among men per 100,000, annual"
9 lab var ln_suicide_rates_women "Log-transformed suicide rates among women per 100,000, annual"
10
11
12
13 /// Variables for changes in death registration in Sweden 1910-1978 (as dummy variables)
14
15 // based on the Bertillon criteria (prior to 1931)
16 gen registration_19101930=0
17 replace registration_19101930=1 if year<=1930
18 lab var registration_19101930 "Dummy variable for death registration in 1910-1930 (Bertillon)"
19
20 // introduced in cooperation with other Nordic countries (1931-1950)
21 gen registration_19311950=0
22 replace registration_19311950=1 if year>=1931 & year<=1950
23 lab var registration_19311950 "Dummy variable for death registration in 1931-1950 (new registration)"
24
25 // ICD-6 (1951-1957)
26 gen registration_19511957=0
27 replace registration_19511957=1 if year>=1951 & year<=1957
28 lab var registration_19511957 "Dummy variable for death registration in 1951-1957 (ICD-6)"
29
30 // ICD-7 (1958-1968)
31 gen registration_19581968=0
32 replace registration_19581968=1 if year>=1958 & year<=1968
33 lab var registration_19581968 "Dummy variable for death registration in 1958-1968 (ICD-7)"
34
35 // ICD-8 (1969-1978)
36 gen registration_1969after=0
37 replace registration_1969after=1 if year>=1969
38 lab var registration_1969after "Dummy variable for death registration in 1969 and after (ICD-8)"
39
40
41
42
43
44
45
46
47
48
49
50
51
52
53
54
55
56
57
58
59
60

```

//// 2. CHECKING VARIABLES' PROPERTIES AND TESTING THE CONDITIONS FOR MODELLING

```

/// Declare data to be time-series data
tsset year, yearly

/// Obtain optimal lags for each variable (for (i) augmentation in ADF and KPSS tests, and (ii) for p and q
parameters in NARDL).
/// Lags obtained for influenza death rates and logarithmically-transformed suicide rates for total population,
men, and women, and for time periods 1910-1978, 1918-1956, and 1957-1978
/// If AIC, HQIC, and SBIC information criteria indicated different lag orders, SBIC was used to select optimal
lags

varsoc influenza_rates_all
varsoc influenza_rates_all if tin(1918, 1956)
varsoc influenza_rates_all if tin(1957, )

varsoc influenza_rates_men

```

## Supplementary material

```
1
2
3 varsoc influenza_rates_men if tin(1918, 1956)
4 varsoc influenza_rates_men if tin(1957, )
5
6 varsoc influenza_rates_women
7 varsoc influenza_rates_women if tin(1918, 1956)
8 varsoc influenza_rates_women if tin(1957, )
9
10 varsoc ln_suicide_rates_all
11 varsoc ln_suicide_rates_all if tin(1918, 1956)
12 varsoc ln_suicide_rates_all if tin(1957, )
13
14 varsoc ln_suicide_rates_men
15 varsoc ln_suicide_rates_men if tin(1918, 1956)
16 varsoc ln_suicide_rates_men if tin(1957, )
17
18 varsoc ln_suicide_rates_women
19 varsoc ln_suicide_rates_women if tin(1918, 1956)
20 varsoc ln_suicide_rates_women if tin(1957, )
21
22 /// Tests for stationarity: ADF and KPSS for influenza death rates and logarithmically-transformed suicide rates
23 variables for total population, men, and women
24 /// Augmentation by at least one lag was used (for suicide rates in women - by two lags according to SBIC in
25 varsoc)
26
27 dfuller influenza_rates_all, lag(1)
28 dfuller influenza_rates_men, lag(1)
29 dfuller influenza_rates_women, lag(1)
30
31 dfuller ln_suicide_rates_all, lag(1)
32 dfuller ln_suicide_rates_men, lag(1)
33 dfuller ln_suicide_rates_women, lag(1)
34 dfuller ln_suicide_rates_women, lag(2)
35
36 dfuller D.influenza_rates_all, lag(1)
37 dfuller D.influenza_rates_men, lag(1)
38 dfuller D.influenza_rates_women, lag(1)
39
40 dfuller D.ln_suicide_rates_all, lag(1)
41 dfuller D.ln_suicide_rates_men, lag(1)
42 dfuller D.ln_suicide_rates_women, lag(1)
43 dfuller D.ln_suicide_rates_women, lag(2)
44
45 kpss influenza_rates_all, maxlag(1) notrend
46 kpss influenza_rates_men, maxlag(1) notrend
47 kpss influenza_rates_women, maxlag(1) notrend
48
49 kpss ln_suicide_rates_all, maxlag(1) notrend
50 kpss ln_suicide_rates_men, maxlag(1) notrend
51 kpss ln_suicide_rates_women, maxlag(2) notrend
52
53 kpss D.influenza_rates_all, maxlag(1) notrend
54 kpss D.influenza_rates_men, maxlag(1) notrend
55 kpss D.influenza_rates_women, maxlag(1) notrend
56
57 kpss D.ln_suicide_rates_all, maxlag(1) notrend
58 kpss D.ln_suicide_rates_men, maxlag(1) notrend
59 kpss D.ln_suicide_rates_women, maxlag(2) notrend
60
```

## Supplementary material

1  
2  
3  
4 *////* 3. ESTIMATION OF NON-LINEAR AUTOREGRESSIVE DISTRIBUTED LAG (NARDL) MODELS:  
5 for total population, men, and women, and for time periods 1910-1978, 1918-1956, and 1957-1978  
6 *///* The dependent and independent variables are indicated in levels.  
7 *///* The covariates (i.e., changes in death registration system 1910-1978) are included with the deterministic  
8 option, but these were only kept in the models if statistically significant.  
9 *///* The optimal number of lags for dependent and independent variables (p and q parameters, respectively).  
10 *///* Since p and q parameters refer to levels, one additional lag is added to p and q to get an optimal lag length in  
11 differences (p and q must be at least 2).  
12 *///* The model provides an output for a long-term cointegration bounds test and diagnostic tests.

13  
14 `nardl ln_suicide_rates_all influenza_rates_all, p(2) q(2) h(69) plot bootstrap(100) level(95) residuals /* used as  
15 a final model */`

16 `nardl ln_suicide_rates_all influenza_rates_all, p(2) q(2) deterministic(registration_19101930  
17 registration_19311950 registration_19511957 registration_19581968 registration_1969after) h(69) plot  
18 bootstrap(100) level(95) residuals`

19  
20 `nardl ln_suicide_rates_men influenza_rates_men, p(2) q(2) h(69) plot bootstrap(100) level(95) residuals /* used  
21 as a final model */`

22 `nardl ln_suicide_rates_men influenza_rates_men, p(2) q(2) deterministic(registration_19101930  
23 registration_19311950 registration_19511957 registration_19581968 registration_1969after) h(69) plot  
24 bootstrap(100) level(95) residuals`

25  
26 `nardl ln_suicide_rates_women influenza_rates_women, p(3) q(2) h(69) plot bootstrap(100) level(95) residuals  
27 /* used as a final model */`

28 `nardl ln_suicide_rates_women influenza_rates_women, p(3) q(2) deterministic(registration_19101930  
29 registration_19311950 registration_19511957 registration_19581968 registration_1969after) h(69) plot  
30 bootstrap(100) level(95) residuals`

31  
32 `nardl ln_suicide_rates_all influenza_rates_all if tin(1918,1956), p(2) q(2) h(39) plot bootstrap(50) level(95)  
33 residuals`

34 `nardl ln_suicide_rates_men influenza_rates_men if tin(1918,1956), p(2) q(2) h(39) plot bootstrap(50) level(95)  
35 residuals`

36 `nardl ln_suicide_rates_women influenza_rates_women if tin(1918,1956), p(5) q(2) h(39) plot bootstrap(50)  
37 level(95) residuals`

38 `nardl ln_suicide_rates_all influenza_rates_all if tin(1957, ), p(2) q(2) h(22) plot bootstrap(50) level(95) residuals`  
39 `nardl ln_suicide_rates_men influenza_rates_men if tin(1957, ), p(2) q(2) h(22) plot bootstrap(50) level(95)  
40 residuals`

41 `nardl ln_suicide_rates_women influenza_rates_women if tin(1957, ), p(2) q(2) h(22) plot bootstrap(50)  
42 level(95) residuals`

43  
44  
45 */\* REFERENCES*

46 For varsoc and dfuller:

47 StataCorp. Stata 15 Base Reference Manual. College Station, TX: Stata Press; 2017

48  
49 For kpss:

50 Author: Christopher F Baum, Boston College, USA baum@@bc.edu

51 Kwiatkowski, D., Phillips, P.C.B., Schmidt, P. and Y. Shin. Testing the null hypothesis of stationarity against  
52 the alternative of a unit root: How sure are we that economic time series have a unit root? Journal of  
53 Econometrics, 54, 1992, 159-178.

54 Lee, D. and P. Schmidt. On the power of the KPSS test of stationarity against fractionally-integrated alternatives.  
55 Journal of Econometrics, 73, 1996, 285-302.

56 Schwert, G.W. Tests for Unit Roots: A Monte Carlo Investigation. Journal of Business and Economic Statistics,  
57 7, 1989, 147-160.

58  
59 For nardl:  
60

## Supplementary material

1  
2  
3 Author: Stata implementation by Marco Sunder (sunder@wifa.uni-leipzig.de). This version was created on  
4 26jan2012.

5 Shin, Y., Yu, B., Greenwood-Nimmo, M. (2011): Modelling asymmetric cointegration and dynamic multipliers  
6 in a nonlinear ARDL framework. Working paper (version of November 2011),  
7 <http://ssrn.com/abstract=1807745>. \*/

8  
9 end of do-file  
10  
11  
12  
13  
14  
15  
16  
17  
18  
19  
20  
21  
22  
23  
24  
25  
26  
27  
28  
29  
30  
31  
32  
33  
34  
35  
36  
37  
38  
39  
40  
41  
42  
43  
44  
45  
46  
47  
48  
49  
50  
51  
52  
53  
54  
55  
56  
57  
58  
59  
60

For peer review only

Supplementary material

eTable 2. Unit root tests at the level and first difference by Augmented Dickey-Fuller (ADF) and Kwiatkowski-Phillips-Schmidt-Shin (KPSS) test statistics

|                                       | ADF at level   |         | KPSS at level  |                      | Results for stationarity at the level | ADF at first difference |         | KPSS at first difference |                      | Results for stationarity at the 1 <sup>st</sup> difference | Order of integration |
|---------------------------------------|----------------|---------|----------------|----------------------|---------------------------------------|-------------------------|---------|--------------------------|----------------------|------------------------------------------------------------|----------------------|
|                                       | Test statistic | p-value | Test statistic | p-value <sup>1</sup> |                                       | Test statistic          | p-value | Test statistic           | p-value <sup>1</sup> |                                                            |                      |
| <b>Suicide rate (log-transformed)</b> |                |         |                |                      |                                       |                         |         |                          |                      |                                                            |                      |
| All                                   | -2.181         | 0.213   | 1.980          | <0.001               | nonstationary                         | -6.640                  | <0.001  | 0.068                    | >0.1                 | stationary                                                 | 1                    |
| Males                                 | -3.230         | 0.018   | 0.964          | <0.001               | nonstationary                         | -6.512                  | <0.001  | 0.053                    | >0.1                 | stationary                                                 | 1                    |
| Females                               | -0.517         | 0.889   | 3.130          | <0.001               | nonstationary                         | -8.692                  | <0.001  | 0.104                    | >0.1                 | stationary                                                 | 1                    |
| <b>Influenza death rate</b>           |                |         |                |                      |                                       |                         |         |                          |                      |                                                            |                      |
| All                                   | -4.895         | <0.001  | 0.461          | >0.1                 | stationary                            | -8.727                  | <0.001  | <i>0.016</i>             | >0.1                 | <i>stationary</i>                                          | 0                    |
| Males                                 | -4.856         | <0.001  | 0.431          | >0.1                 | stationary                            | -8.642                  | <0.001  | <i>0.016</i>             | >0.1                 | <i>stationary</i>                                          | 0                    |
| Females                               | -4.940         | <0.001  | 0.491          | >0.1                 | stationary                            | -8.824                  | <0.001  | <i>0.015</i>             | >0.1                 | <i>stationary</i>                                          | 0                    |

Note: For the ADF test, the null hypothesis implies that the variable contains a unit root (the alternate hypothesis is that the variable is stationary), whereas for the KPSS test the null hypothesis implies that the variable is stationary (the alternate hypothesis is that there is a unit root). The results for ADF and KPSS tests for stationarity at first difference for influenza death rates are reported as explanatory (written in Italics) since the stationarity at the level has already been established (i.e., integrated of the order zero).

<sup>1</sup> KPSS test results do not indicate the exact p-value, but report the level of significance at which the null hypothesis is rejected (1%, 2.5%, 5%, or 10% significance level).

Abbreviations: ADF, Augmented Dickey-Fuller unit-root test; KPSS, Kwiatkowski-Phillips-Schmidt-Shin test for stationarity

## Supplementary material

**eTable 3. Full specification for non-linear autoregressive distributed lag models used for the analysis of short-term and long-term relationship of suicide rates with positive and negative changes in influenza death rates among the whole population, men, and women in 1910-1978 in Sweden**

|                          | Whole population               |         | Men                            |         | Women                           |         |
|--------------------------|--------------------------------|---------|--------------------------------|---------|---------------------------------|---------|
|                          | Coefficient (95% CI)           | p-value | Coefficient (95% CI)           | p-value | Coefficient (95% CI)            | p-value |
| LnSuicide, lag 1         | -0.08466 (-0.23940 to 0.07009) | 0.278   | -0.11457 (-0.30588 to 0.07674) | 0.235   | -0.04517 (-0.15832 to 0.06799)  | 0.427   |
| Influenza +, lag 1       | -0.00001 (-0.00761 to 0.00759) | 0.998   | -0.00150 (-0.01032 to 0.00732) | 0.734   | 0.00508 (-0.00366 to 0.01382)   | 0.249   |
| Influenza -, lag 1       | -0.00018 (-0.00775 to 0.00739) | 0.962   | -0.00165 (-0.01044 to 0.00714) | 0.708   | 0.00487 (-0.00383 to 0.01358)   | 0.267   |
| ΔLnSuicide, lag 1        | -0.14610 (-0.43113 to 0.13893) | 0.309   | 0.029465 (-0.27204 to 0.33097) | 0.846   | -0.65184 (-0.91785 to -0.38582) | <0.001  |
| ΔLnSuicide, lag 2        | NA                             | NA      | NA                             | NA      | -0.30807 (-0.55722 to -0.05892) | 0.016   |
| ΔInfluenza +             | 0.00002 (-0.00036 to 0.00039)  | 0.931   | 0.00004 (-0.00034 to 0.00041)  | 0.854   | -0.00007 (-0.00056 to 0.00041)  | 0.760   |
| ΔInfluenza +, lag 1      | 0.00153 (-0.00285 to 0.00590)  | 0.488   | 0.00085 (-0.00347 to 0.00518)  | 0.694   | 0.00093 (-0.00482 to 0.00668)   | 0.747   |
| ΔInfluenza -             | 0.00103 (-0.00579 to 0.00785)  | 0.764   | -0.00192 (-0.01005 to 0.00621) | 0.638   | 0.00780 (0.00015 to 0.01544)    | 0.046   |
| ΔInfluenza -, lag 1      | -0.00070 (-0.00236 to 0.00096) | 0.401   | -0.00038 (-0.00212 to 0.00136) | 0.663   | -0.000075 (-0.00289 to 0.00139) | 0.488   |
| <b>Long-term effect</b>  |                                |         |                                |         |                                 |         |
| Influenza +              | -0.00012                       | 0.998   | -0.01314                       | 0.745   | 0.11254                         | 0.538   |
| Influenza -              | 0.00211                        | 0.962   | 0.01443                        | 0.722   | -0.10789                        | 0.544   |
| <b>Model diagnostics</b> |                                |         |                                |         |                                 |         |



Supplementary material

|                                      |                                        |       |                                        |       |                                        |       |
|--------------------------------------|----------------------------------------|-------|----------------------------------------|-------|----------------------------------------|-------|
| Q-test for autocorrelation, $\chi^2$ | 40.160                                 | 0.125 | 35.260                                 | 0.273 | 31.850                                 | 0.424 |
| Heteroscedasticity, $\chi^2$         | 3.649                                  | 0.056 | 5.439                                  | 0.020 | 1.280                                  | 0.258 |
| Normality, $\chi^2$                  | 2.826                                  | 0.243 | 2.237                                  | 0.327 | 2.372                                  | 0.305 |
| RESET, F-statistics                  | 4.656                                  | 0.006 | 5.473                                  | 0.023 | 1.013                                  | 0.394 |
| CUSUM                                | Stable, no structural break            | NA    | Stable, no structural break            | NA    | Stable, no structural break            | NA    |
| CUSUMQ                               | Stable                                 | NA    | Stable                                 | NA    | Stable                                 | NA    |
| Adj. R <sup>2</sup>                  | 0.257                                  | NA    | 0.300                                  | NA    | 0.374                                  | NA    |
| Wald <sub>SR</sub> , F-statistics    | 0.054                                  | 0.817 | 0.275                                  | 0.602 | 1.062                                  | 0.307 |
| Wald <sub>LR</sub> , F-statistics    | 1.206                                  | 0.277 | 1.176                                  | 0.283 | 0.771                                  | 0.384 |
| <b>Cointegration test statistics</b> |                                        |       |                                        |       |                                        |       |
| t_BDM                                | -1.095                                 | NA    | -1.199                                 | NA    | -0.799                                 | NA    |
| F_PSS                                | 3.789                                  | NA    | 3.735                                  | NA    | 2.530                                  | NA    |
| <b>Critical values for F_PSS</b>     |                                        |       |                                        |       |                                        |       |
| 5% critical values; I(0), I(1)       | k=1: 5.055, 5.915<br>k=2: 3.947, 5.020 | NA    | k=1: 5.055, 5.915<br>k=2: 3.947, 5.020 | NA    | k=1: 5.055, 5.915<br>k=2: 3.947, 5.020 | NA    |

Note: F\_PSS denotes F-statistics for Pesaran/Shin/Smith bounds test with null hypothesis of no cointegration. Critical values are retrieved from Narayan PK (2005) for a sample size of n=70.[1] The null hypothesis of no cointegration is supported if F\_PSS statistics is lower than 5% I(0) critical value; the null hypothesis is rejected if F\_PSS statistics is greater than 5% I(1) critical value. We applied a conservative approach to considering the number of exposure variables (k), as suggested by Shin Y, et al (2014) [2] (since influenza death rates represent one exposure (k=1), while the analysis actually partitions the

## Supplementary material

1  
2 exposure to positive and negative changes ( $k=2$ ). In a given table, the results of  $F_{PSS}$  for the whole population, men, and women are lower than the reported  
3 5%  $I(0)$  critical values that accepts a null hypothesis of no cointegration.  
4

5 “LnSuicide” indicates that suicide rates were logarithmically-transformed. “ $\Delta$ ” signifies the series is differenced. Signs as “+” and “-” denote the exposure  
6 variable being partitioned in positive and negative changes, respectively. “NA” denotes that a certain test or test parameter is not applicable.

7 Number of lags used for each variable in the model are noted by “lag#”. To select the optimal number of lags to be used for choosing  $p$  and  $q$  parameters for the  
8 NARDL (i.e., numbers of lags for dependent and independent variables, respectively), we applied a varsoc command in STATA using the minimal values of  
9 Akaike Information Criterion, Schwarz’s Bayesian information criterion (SBIC), and the Hannan and Quinn information criterion information criteria. If  
10 information criteria indicated different lag orders, SBIC was used to select optimal lags. Thus, for the analysis of the whole population and men, both exposure  
11 and outcome time series were lagged once, while for analysis among women to outcome time series were lagged twice and exposure time series were lagged  
12 once.

13 Wald test for asymmetry in a short-term ( $Wald_{SR}$ ) and long-term ( $Wald_{LR}$ ) has a null hypothesis of no cointegration. Q-test for autocorrelation reports the results  
14 of Portmanteau test for white noise. Heteroscedasticity is measured by Breusch-Pagan/Cook-Weisberg test. Normality is measured by Jarque-Bera test. RESET  
15 statistics refers to the regression specification error tests. CUSUM and CUSUMQ refer to the tests of the cumulative sum of recursive residuals and their squares,  
16 respectively. “Stable, no structural break” in the results of CUSUM indicates that the model was found stable and the null hypothesis of no structural break was  
17 not rejected (same applies to “Stable” as an output for CUSUMQ).  
18  
19  
20  
21  
22  
23  
24  
25  
26  
27  
28  
29  
30  
31  
32  
33  
34  
35  
36  
37  
38  
39  
40  
41  
42  
43  
44  
45  
46

## Supplementary material

**eTable 4. Full specification for non-linear autoregressive distributed lag models used for the analysis of short-term and long-term relationship of suicide rates with positive and negative changes in influenza death rates among the whole population, men, and women in 1918-1956 in Sweden**

|                         | Whole population               |         | Men                             |         | Women                          |         |
|-------------------------|--------------------------------|---------|---------------------------------|---------|--------------------------------|---------|
|                         | Coefficient (95% CI)           | p-value | Coefficient (95% CI)            | p-value | Coefficient (95% CI)           | p-value |
| LnSuicide, lag 1        | -0.32229 (-0.73472 to 0.09015) | 0.121   | -0.26417 (-0.60333 to 0.07492)  | 0.122   | -0.36067 (-0.97384 to 0.25250) | 0.238   |
| Influenza +, lag 1      | 0.00003 (-0.00851 to 0.00858)  | 0.994   | -0.00129 (-0.011384 to 0.00879) | 0.795   | 0.00506 (-0.00682 to 0.01695)  | 0.390   |
| Influenza -, lag 1      | -0.00033 (-0.00869 to 0.00803) | 0.936   | -0.00145 (-0.01129 to 0.00840)  | 0.766   | 0.00396 (-0.00801 to 0.01593)  | 0.503   |
| ΔLnSuicide, lag 1       | -0.19387 (-0.59955 to 0.21181) | 0.337   | -0.03045 (-0.44243 to 0.38153)  | 0.881   | -0.58189 (-1.19784 to 0.03406) | 0.063   |
| ΔLnSuicide, lag 2       | NA                             | NA      | NA                              | NA      | -0.36148 (-0.91643 to 0.19346) | 0.193   |
| ΔLnSuicide, lag 3       | NA                             | NA      | NA                              | NA      | -0.11520 (-0.61658 to 0.38617) | 0.641   |
| ΔLnSuicide, lag 4       | NA                             | NA      | NA                              | NA      | 0.11306 (-0.26409 to 0.49021)  | 0.544   |
| ΔInfluenza +            | 0.00002 (-0.00077 to 0.00082)  | 0.955   | -0.00014 (-0.00102 to 0.00075)  | 0.755   | 0.00098 (-0.00068 to 0.00263)  | 0.237   |
| ΔInfluenza +, lag 1     | 0.00140 (-0.00347 to 0.00627)  | 0.561   | 0.00095 (-0.00389 to 0.00580)   | 0.691   | -0.00063 (-0.00821 to 0.00696) | 0.866   |
| ΔInfluenza -            | 0.00087 (-0.00643 to 0.00817)  | 0.809   | -0.00132 (-0.01001 to 0.00741)  | 0.760   | 0.00434 (-0.00595 to 0.01463)  | 0.394   |
| ΔInfluenza -, lag 1     | -0.00076 (-0.00256 to 0.00104) | 0.396   | -0.00044 (-0.00233 to 0.00145)  | 0.637   | -0.00052 (-0.00328 to 0.00224) | 0.704   |
| <b>Long-term effect</b> |                                |         |                                 |         |                                |         |
| Influenza +             | 0.00011                        | 0.994   | -0.00490                        | 0.802   | 0.01403                        | 0.521   |

## Supplementary material

|                                      |                                        |       |                                        |       |                                        |       |
|--------------------------------------|----------------------------------------|-------|----------------------------------------|-------|----------------------------------------|-------|
| Influenza –                          | 0.00103                                | 0.936 | 0.00548                                | 0.775 | -0.01098                               | 0.600 |
| <b>Model diagnostics</b>             |                                        |       |                                        |       |                                        |       |
| Q-test for autocorrelation, $\chi^2$ | 14.130                                 | 0.658 | 9.674                                  | 0.917 | 9.614                                  | 0.919 |
| Heteroscedasticity, $\chi^2$         | 0.939                                  | 0.333 | 0.768                                  | 0.381 | 5.042                                  | 0.025 |
| Normality, $\chi^2$                  | 0.420                                  | 0.811 | 0.132                                  | 0.936 | 2.383                                  | 0.304 |
| RESET, F-statistics                  | 0.413                                  | 0.745 | 0.764                                  | 0.524 | 0.505                                  | 0.683 |
| CUSUM                                | Stable, no structural break            | NA    | Stable, no structural break            | NA    | Stable, no structural break            | NA    |
| CUSUMQ                               | Stable                                 | NA    | Stable                                 | NA    | Stable                                 | NA    |
| Adj. R <sup>2</sup>                  | 0.309                                  | NA    | 0.345                                  | NA    | 0.432                                  | NA    |
| Wald <sub>SR</sub> , F-statistics    | 0.056                                  | 0.815 | 0.155                                  | 0.697 | 0.183                                  | 0.673 |
| Wald <sub>LR</sub> , F-statistics    | 1.555                                  | 0.222 | 0.217                                  | 0.645 | 4.479                                  | 0.044 |
| <b>Cointegration test statistics</b> |                                        |       |                                        |       |                                        |       |
| t_BDM                                | -1.596                                 | NA    | -1.591                                 | NA    | -1.207                                 | NA    |
| F_PSS                                | 1.009                                  | NA    | 1.019                                  | NA    | 1.328                                  | NA    |
| <b>Critical values for F_PSS</b>     |                                        |       |                                        |       |                                        |       |
| 5% critical values; I(0) to I(1)     | k=1: 5.260, 6.160<br>k=2: 4.133, 5.260 | NA    | k=1: 5.260, 6.160<br>k=2: 4.133, 5.260 | NA    | k=1: 5.260, 6.160<br>k=2: 4.133, 5.260 | NA    |

## Supplementary material

1  
2  
3 *Note:* F\_PSS denotes F-statistics for Pesaran/Shin/Smith bounds test with null hypothesis of no cointegration. Critical values are retrieved from Narayan PK  
4 (2005) for a sample size of  $n=40$  [1]. The null hypothesis of no cointegration is supported if F\_PSS statistics is lower than 5% I(0) critical value; the null  
5 hypothesis is rejected if F\_PSS statistics is greater than 5% I(1) critical value. We applied a conservative approach to considering the number of exposure  
6 variables ( $k$ ), as suggested by Shin Y, et al (2014) [2] (since influenza death rates represent one exposure ( $k=1$ ), while the analysis actually partitions the  
7 exposure to positive and negative changes ( $k=2$ )). In a given table, the results of F\_PSS for the whole population, men, and women are lower than the reported  
8 5% I(0) critical values that accepts a null hypothesis of no cointegration.

9 “LnSuicide” indicates that suicide rates were logarithmically-transformed. “ $\Delta$ ” signifies the series is differenced. Signs as “+” and “-” denote the exposure  
10 variable being partitioned in positive and negative changes, respectively. “NA” denotes that a certain test or test parameter is not applicable.

11 Number of lags used for each variable in the model are noted by “lag#”. To select the optimal number of lags to be used for choosing  $p$  and  $q$  parameters for the  
12 NARDL (i.e., numbers of lags for dependent and independent variables, respectively), we applied a varsoc command in STATA using the minimal values of  
13 Akaike Information Criterion, Schwarz’s Bayesian information criterion (SBIC), and the Hannan and Quinn information criterion information criteria. If  
14 information criteria indicated different lag orders, SBIC was used to select optimal lags. Thus, for the analysis of the whole population and men, both exposure  
15 and outcome time series were lagged once, while for analysis among women, outcome time series were lagged four times and exposure time series were lagged  
16 once.

17 Wald test for asymmetry in a short-term ( $Wald_{SR}$ ) and long-term ( $Wald_{LR}$ ) has a null hypothesis of no cointegration. Q-test for autocorrelation reports the results  
18 of Portmanteau test for white noise. Heteroscedasticity is measured by Breusch-Pagan/Cook-Weisberg test. Normality is measured by Jarque-Bera test. RESET  
19 statistics refers to the regression specification error tests. CUSUM and CUSUMQ refer to the tests of the cumulative sum of recursive residuals and their squares,  
20 respectively. “Stable, no structural break” in the results of CUSUM indicates that the model was found stable and the null hypothesis of no structural break was  
21 not rejected (same applies to “Stable” as an output for CUSUMQ).  
22  
23  
24  
25  
26  
27  
28  
29  
30  
31  
32  
33  
34  
35  
36  
37  
38  
39  
40  
41  
42  
43  
44  
45  
46

## Supplementary material

**eTable 5. Full specification for non-linear autoregressive distributed lag models used for the analysis of short-term and long-term relationship of suicide rates with positive and negative changes in influenza death rates among the whole population, men, and women in 1957-1978 in Sweden**

|                                      | Whole population                |         | Men                             |         | Women                           |         |
|--------------------------------------|---------------------------------|---------|---------------------------------|---------|---------------------------------|---------|
|                                      | Coefficient (95% CI)            | p-value | Coefficient (95% CI)            | p-value | Coefficient (95% CI)            | p-value |
| LnSuicide, lag 1                     | -0.64009 (-1.15104 to -0.12914) | 0.018   | -0.52238 (-1.11901 to 0.07425)  | 0.081   | -0.66040 (-1.04522 to -0.27558) | 0.003   |
| Influenza +, lag 1                   | 0.008034 (-0.02823 to 0.04429)  | 0.640   | -0.01385 (-0.05324 to 0.02553)  | 0.461   | 0.02702 (-0.00364 to 0.05768)   | 0.079   |
| Influenza -, lag 1                   | 0.00661 (-0.02823 to 0.04429)   | 0.699   | -0.01281 (-0.054045 to 0.02841) | 0.514   | 0.01895 (-0.01066 to 0.04857)   | 0.190   |
| $\Delta$ LnSuicide, lag 1            | 0.14293 (-0.41621 to 0.70206)   | 0.590   | -0.04565 (-0.70111 to 0.60981)  | 0.883   | 0.16936 (-0.25995 to 0.59868)   | 0.409   |
| $\Delta$ Influenza +                 | -0.00964 (-0.02252 to 0.00324)  | 0.883   | -0.00876 (-0.02738 to 0.00985)  | 0.328   | -0.00976 (-0.02033 to 0.00081)  | 0.068   |
| $\Delta$ Influenza +, lag 1          | -0.01999 (-0.04573 to 0.00574)  | 0.117   | -0.01837 (-0.04871 to 0.01197)  | 0.214   | -0.01298 (-0.04073 to 0.014772) | 0.331   |
| $\Delta$ Influenza -                 | 0.00194 (-0.02614 to 0.03003)   | 0.130   | -0.01531 (-0.04658 to 0.01596)  | 0.309   | 0.02155 (-0.00343 to 0.04653)   | 0.085   |
| $\Delta$ Influenza -, lag 1          | 0.00864 (-0.00271 to 0.02000)   | 0.124   | 0.01033 (-0.00294 to 0.02359)   | 0.116   | 0.00585 (-0.00565 to 0.01735)   | 0.292   |
| <b>Long-term effect</b>              |                                 |         |                                 |         |                                 |         |
| Influenza +                          | 0.01255                         | 0.618   | -0.02659                        | 0.541   | 0.04091                         | 0.064   |
| Influenza -                          | -0.01033                        | 0.684   | 0.024538                        | 0.582   | -0.02870                        | 0.184   |
| <b>Model diagnostics</b>             |                                 |         |                                 |         |                                 |         |
| Q-test for autocorrelation, $\chi^2$ | 5.662                           | 0.773   | 3.790                           | 0.925   | 5.243                           | 0.813   |

Supplementary material

|                                      |                                        |       |                                        |       |                                        |        |
|--------------------------------------|----------------------------------------|-------|----------------------------------------|-------|----------------------------------------|--------|
| Heteroscedasticity, $\chi^2$         | 0.102                                  | 0.750 | 0.155                                  | 0.694 | 0.079                                  | 0.778  |
| Normality, $\chi^2$                  | 1.569                                  | 0.456 | 1.627                                  | 0.443 | 1.237                                  | 0.537  |
| RESET, F-statistics                  | 5.839                                  | 0.014 | 3.348                                  | 0.064 | 1.089                                  | 0.398  |
| CUSUM                                | Stable, no structural break            | NA    | Stable, no structural break            | NA    | Stable, no structural break            | NA     |
| CUSUMQ                               | Stable                                 | NA    | Stable                                 | NA    | Stable                                 | NA     |
| Adj. R <sup>2</sup>                  | 0.246                                  | NA    | 0.337                                  | NA    | 0.371                                  | NA     |
| Wald <sub>SR</sub> , F-statistics    | 2.903                                  | 0.112 | 0.536                                  | 0.477 | 7.132                                  | 0.019  |
| Wald <sub>LR</sub> , F-statistics    | 0.922                                  | 0.354 | 0.297                                  | 0.595 | 26.74                                  | <0.001 |
| <b>Cointegration test statistics</b> |                                        |       |                                        |       |                                        |        |
| t_BDM                                | -2.706                                 | NA    | -1.891                                 | NA    | -3.707                                 | NA     |
| F_PSS                                | 2.649                                  | NA    | 2.075                                  | NA    | 4.688                                  | NA     |
| <b>Critical values for F_PSS</b>     |                                        |       |                                        |       |                                        |        |
| 5% critical values; I(0), I(1)       | k=1: 5.395, 6.350<br>k=2: 4.267, 5.473 | NA    | k=1: 5.395, 6.350<br>k=2: 4.267, 5.473 | NA    | k=1: 5.395, 6.350<br>k=2: 4.267, 5.473 | NA     |

Note: F\_PSS denotes F-statistics for Pesaran/Shin/Smith bounds test with null hypothesis of no cointegration. Critical values are retrieved from Narayan PK (2005) for a sample size of n=30 [1]. The null hypothesis of no cointegration is supported if F\_PSS statistics is lower than 5% I(0) critical value; the null hypothesis is rejected if F\_PSS statistics is greater than 5% I(1) critical value. We applied a conservative approach to considering the number of exposure variables (k), as suggested by Shin Y, et al (2014) [2] (since influenza death rates represent one exposure (k=1), while the analysis actually partitions the exposure to positive and negative changes (k=2)). In a given table, the results of F\_PSS for the whole population, men, and women are lower than the reported 5% I(0) critical values that accepts a null hypothesis of no cointegration.

## Supplementary material

1  
2  
3 “LnSuicide” indicates that suicide rates were logarithmically-transformed. “ $\Delta$ ” signifies the series is differenced. Signs as “+” and “-” denote the exposure  
4 variable being partitioned in positive and negative changes, respectively. “NA” denotes that a certain test or test parameter is not applicable.

5 Number of lags used for each variable in the model are noted by “lag#”. To select the optimal number of lags to be used for choosing p and q parameters for the  
6 NARDL (i.e., numbers of lags for dependent and independent variables, respectively), we applied a varsoc command in STATA using the minimal values of  
7 Akaike Information Criterion, Schwarz’s Bayesian information criterion (SBIC), and the Hannan and Quinn information criterion information criteria. If  
8 information criteria indicated different lag orders, SBIC was used to select optimal lags. Thus, for the analysis of the whole population, men, and women, both  
9 exposure and outcome time series were lagged once.

10 Wald test for asymmetry in a short-term ( $Wald_{SR}$ ) and long-term ( $Wald_{LR}$ ) has a null hypothesis of no cointegration. Q-test for autocorrelation reports the results  
11 of Portmanteau test for white noise. Heteroscedasticity is measured by Breusch-Pagan/Cook-Weisberg test. Normality is measured by Jarque-Bera test. RESET  
12 statistics refers to the regression specification error tests. CUSUM and CUSUMQ refer to the tests of the cumulative sum of recursive residuals and their squares,  
13 respectively. “Stable, no structural break” in the results of CUSUM indicates that the model was found stable and the null hypothesis of no structural break was  
14 not rejected (same applies to “Stable” as an output for CUSUMQ).

## REFERENCES

- 15  
16  
17  
18 1 Narayan PK. The saving and investment nexus for China: evidence from cointegration tests. *Applied Economics* 2005; **37**(17): 1979–1990.  
19 2 Shin Y, Yu B, Greenwood-Nimmo M. Modelling Asymmetric Cointegration and Dynamic Multipliers in a Nonlinear ARDL Framework. In: Sickles  
20 RC, Horrace WC, eds. *Festschrift in Honor of Peter Schmidt: Econometric Methods and Applications*. New York: Springer Science+Business Media,  
21 2014: 281–314.  
22  
23  
24  
25  
26  
27  
28  
29  
30  
31  
32  
33  
34  
35  
36  
37  
38  
39  
40  
41  
42  
43  
44  
45  
46



## STROBE Statement—checklist of items that should be included in reports of observational studies

|                              | Item No                                                                                                                                                                                                                                                                                                   | Recommendation                                                                                                                                                                                                                                                                                                                                                                                                                                                         | Page No |
|------------------------------|-----------------------------------------------------------------------------------------------------------------------------------------------------------------------------------------------------------------------------------------------------------------------------------------------------------|------------------------------------------------------------------------------------------------------------------------------------------------------------------------------------------------------------------------------------------------------------------------------------------------------------------------------------------------------------------------------------------------------------------------------------------------------------------------|---------|
| <b>Title and abstract</b>    | 1                                                                                                                                                                                                                                                                                                         | (a) Indicate the study's design with a commonly used term in the title or the abstract                                                                                                                                                                                                                                                                                                                                                                                 | 1       |
|                              |                                                                                                                                                                                                                                                                                                           | (b) Provide in the abstract an informative and balanced summary of what was done and what was found                                                                                                                                                                                                                                                                                                                                                                    | 2       |
| <b>Introduction</b>          |                                                                                                                                                                                                                                                                                                           |                                                                                                                                                                                                                                                                                                                                                                                                                                                                        |         |
| Background/rationale         | 2                                                                                                                                                                                                                                                                                                         | Explain the scientific background and rationale for the investigation being reported                                                                                                                                                                                                                                                                                                                                                                                   | 3       |
| Objectives                   | 3                                                                                                                                                                                                                                                                                                         | State specific objectives, including any prespecified hypotheses                                                                                                                                                                                                                                                                                                                                                                                                       | 3       |
| <b>Methods</b>               |                                                                                                                                                                                                                                                                                                           |                                                                                                                                                                                                                                                                                                                                                                                                                                                                        |         |
| Study design                 | 4                                                                                                                                                                                                                                                                                                         | Present key elements of study design early in the paper                                                                                                                                                                                                                                                                                                                                                                                                                | 3-4     |
| Setting                      | 5                                                                                                                                                                                                                                                                                                         | Describe the setting, locations, and relevant dates, including periods of recruitment, exposure, follow-up, and data collection                                                                                                                                                                                                                                                                                                                                        | 3-5     |
| Participants                 | 6                                                                                                                                                                                                                                                                                                         | (a) <i>Cohort study</i> —Give the eligibility criteria, and the sources and methods of selection of participants. Describe methods of follow-up<br><i>Case-control study</i> —Give the eligibility criteria, and the sources and methods of case ascertainment and control selection. Give the rationale for the choice of cases and controls<br><i>Cross-sectional study</i> —Give the eligibility criteria, and the sources and methods of selection of participants | 3-5     |
|                              |                                                                                                                                                                                                                                                                                                           | (b) <i>Cohort study</i> —For matched studies, give matching criteria and number of exposed and unexposed<br><i>Case-control study</i> —For matched studies, give matching criteria and the number of controls per case                                                                                                                                                                                                                                                 | n/a     |
| Variables                    | 7                                                                                                                                                                                                                                                                                                         | Clearly define all outcomes, exposures, predictors, potential confounders, and effect modifiers. Give diagnostic criteria, if applicable                                                                                                                                                                                                                                                                                                                               | 3-4     |
| Data sources/<br>measurement | 8*                                                                                                                                                                                                                                                                                                        | For each variable of interest, give sources of data and details of methods of assessment (measurement). Describe comparability of assessment methods if there is more than one group                                                                                                                                                                                                                                                                                   | 3-4     |
| Bias                         | 9                                                                                                                                                                                                                                                                                                         | Describe any efforts to address potential sources of bias                                                                                                                                                                                                                                                                                                                                                                                                              | 4       |
| Study size                   | 10                                                                                                                                                                                                                                                                                                        | Explain how the study size was arrived at                                                                                                                                                                                                                                                                                                                                                                                                                              | 4       |
| Quantitative variables       | 11                                                                                                                                                                                                                                                                                                        | Explain how quantitative variables were handled in the analyses. If applicable, describe which groupings were chosen and why                                                                                                                                                                                                                                                                                                                                           | 5       |
| Statistical methods          | 12                                                                                                                                                                                                                                                                                                        | (a) Describe all statistical methods, including those used to control for confounding                                                                                                                                                                                                                                                                                                                                                                                  | 5       |
|                              |                                                                                                                                                                                                                                                                                                           | (b) Describe any methods used to examine subgroups and interactions                                                                                                                                                                                                                                                                                                                                                                                                    | 5       |
|                              | (c) Explain how missing data were addressed                                                                                                                                                                                                                                                               | n/a                                                                                                                                                                                                                                                                                                                                                                                                                                                                    |         |
|                              | (d) <i>Cohort study</i> —If applicable, explain how loss to follow-up was addressed<br><i>Case-control study</i> —If applicable, explain how matching of cases and controls was addressed<br><i>Cross-sectional study</i> —If applicable, describe analytical methods taking account of sampling strategy | n/a                                                                                                                                                                                                                                                                                                                                                                                                                                                                    |         |
|                              | (e) Describe any sensitivity analyses                                                                                                                                                                                                                                                                     | n/a                                                                                                                                                                                                                                                                                                                                                                                                                                                                    |         |

Continued on next page

| <b>Results</b>           |     |                                                                                                                                                                                                              |                |
|--------------------------|-----|--------------------------------------------------------------------------------------------------------------------------------------------------------------------------------------------------------------|----------------|
| Participants             | 13* | (a) Report numbers of individuals at each stage of study—eg numbers potentially eligible, examined for eligibility, confirmed eligible, included in the study, completing follow-up, and analysed            | n/a            |
|                          |     | (b) Give reasons for non-participation at each stage                                                                                                                                                         | n/a            |
|                          |     | (c) Consider use of a flow diagram                                                                                                                                                                           | n/a            |
| Descriptive data         | 14* | (a) Give characteristics of study participants (eg demographic, clinical, social) and information on exposures and potential confounders                                                                     | 5-7            |
|                          |     | (b) Indicate number of participants with missing data for each variable of interest                                                                                                                          | n/a            |
|                          |     | (c) <i>Cohort study</i> —Summarise follow-up time (eg, average and total amount)                                                                                                                             | n/a            |
| Outcome data             | 15* | <i>Cohort study</i> —Report numbers of outcome events or summary measures over time                                                                                                                          | 6-7            |
|                          |     | <i>Case-control study</i> —Report numbers in each exposure category, or summary measures of exposure                                                                                                         |                |
|                          |     | <i>Cross-sectional study</i> —Report numbers of outcome events or summary measures                                                                                                                           |                |
| Main results             | 16  | (a) Give unadjusted estimates and, if applicable, confounder-adjusted estimates and their precision (eg, 95% confidence interval). Make clear which confounders were adjusted for and why they were included | 5-7, and 13-15 |
|                          |     | (b) Report category boundaries when continuous variables were categorized                                                                                                                                    |                |
|                          |     | (c) If relevant, consider translating estimates of relative risk into absolute risk for a meaningful time period                                                                                             |                |
| Other analyses           | 17  | Report other analyses done—eg analyses of subgroups and interactions, and sensitivity analyses                                                                                                               |                |
| <b>Discussion</b>        |     |                                                                                                                                                                                                              |                |
| Key results              | 18  | Summarise key results with reference to study objectives                                                                                                                                                     | 7              |
| Limitations              | 19  | Discuss limitations of the study, taking into account sources of potential bias or imprecision. Discuss both direction and magnitude of any potential bias                                                   | 8              |
| Interpretation           | 20  | Give a cautious overall interpretation of results considering objectives, limitations, multiplicity of analyses, results from similar studies, and other relevant evidence                                   | 7-8            |
| Generalisability         | 21  | Discuss the generalisability (external validity) of the study results                                                                                                                                        | 8              |
| <b>Other information</b> |     |                                                                                                                                                                                                              |                |
| Funding                  | 22  | Give the source of funding and the role of the funders for the present study and, if applicable, for the original study on which the present article is based                                                | 9              |

\*Give information separately for cases and controls in case-control studies and, if applicable, for exposed and unexposed groups in cohort and cross-sectional studies.

**Note:** An Explanation and Elaboration article discusses each checklist item and gives methodological background and published examples of transparent reporting. The STROBE checklist is best used in conjunction with this article (freely available on the Web sites of PLoS Medicine at <http://www.plosmedicine.org/>, Annals of Internal Medicine at <http://www.annals.org/>, and Epidemiology at <http://www.epidem.com/>). Information on the STROBE Initiative is available at [www.strobe-statement.org](http://www.strobe-statement.org).
